# Supplementary material for: Inferring Metabolic States in Uncharacterized Environments Using Gene-Expression Measurements
Source: PLoS Comput Biol. 2013 Mar 21;9(3):e1002988. doi: 10.1371/journal.pcbi.1002988 (PMC3605102; doi:10.1371/journal.pcbi.1002988)
Supplement: Table S1 — Gene-expression calls. Based on the gene expression measurements from yeast cells growing on glucose (YPD) or ethanol (YPEtOH) [33], we classified the top 15% highest expressed genes as ‘highly expressed’ (denoted with a ‘1’) and the bottom 15% lowest expressed genes as ‘lowly expressed’ (denoted with ‘−1’). Genes outside the highly and lowly expressed sets are indicated with a ‘0’. (XLSX) [file pcbi.1002988.s004.xlsx]

## Sheet: tableS2_geneExpressionCalls.csv
gene	YPD	YPEtOH
YAL008W	0	0
YBR255W	0	1
YGR164W	0	0
YGR131W	0	1
YNL003C	-1	0
YBR135W	0	0
YBR160W	0	0
YJL082W	0	-1
YJL142C	0	0
YPL191C	0	0
YGL215W	0	0
YKL074C	0	0
YJL077C	0	1
YKL096W-A	0	0
YIL124W	0	0
YIL171W	0	0
YPL039W	0	0
YNL170W	0	0
YGL141W	0	-1
YJL179W	0	0
YKL083W	0	0
YOR009W	-1	0
YKL029C	0	0
YPL166W	0	0
YKL052C	0	-1
YHR025W	1	-1
YOL034W	1	0
YBL008W	0	0
YIL062C	0	-1
YCL023C	0	0
YOL116W	0	1
YDR196C	0	0
YBR280C	0	0
YNR032W	0	0
YNR045W	0	0
YML105C	0	0
YNL288W	0	-1
YIL059C	-1	0
YIL004C	0	0
YNR018W	0	1
YPL144W	0	0
YFR047C	0	1
YHR078W	0	0
YJR115W	0	0
YLR355C	1	-1
YGR099W	0	0
YLR300W	0	0
YCL028W	0	0
YJR140C	0	1
YOR033C	0	0
YOR062C	0	0
YBR043C	0	0
YHR112C	0	0
YLR011W	0	0
YHR007C	0	-1
YHR126C	0	0
YKR084C	1	0
YER121W	0	1
YCR046C	0	0
YKL204W	0	0
YOR266W	0	0
YDR393W	0	0
YGL171W	0	-1
YPR194C	-1	-1
YGR019W	0	1
YBL033C	0	0
YJL188C	1	0
YLL057C	1	0
YNL229C	0	0
YNL277W	-1	0
YMR040W	0	1
YDR077W	-1	0
YMR266W	0	0
YKR064W	0	0
YPL089C	0	0
YGR277C	0	0
YDL139C	0	0
YDR246W	0	0
YOR288C	0	0
YCR028C	0	0
YML054C	-1	1
YLR179C	1	-1
YOR141C	1	0
YPL280W	0	1
YBL106C	0	0
YGL044C	1	0
YER107C	1	0
YBR038W	0	0
YJL021C	-1	0
YGR259C	0	0
YEL047C	1	-1
YPR016C	1	0
YLR157C	0	0
YDL055C	0	-1
YML009C	0	0
YML072C	0	0
YDR142C	0	0
YFL044C	0	1
YKL019W	-1	0
YJL130C	0	0
YBL085W	1	0
YBR116C	-1	1
YDR166C	0	0
YDR082W	0	1
YDR348C	0	0
YKL182W	0	0
YDR333C	0	0
YPL027W	0	0
YIR012W	0	-1
YLR363C	0	0
YDR179C	0	0
YML089C	-1	1
YLR431C	0	0
YKR046C	0	1
YJR005W	0	0
YJL116C	-1	1
YER030W	0	0
YHR041C	0	-1
YJR072C	0	0
YDR047W	-1	0
YKR039W	0	1
YGL003C	0	0
YPL009C	1	0
YDR268W	0	0
YGL192W	0	0
YDL117W	0	0
YMR131C	1	-1
YMR293C	0	1
YJL214W	-1	0
YIL105C	0	-1
YML126C	0	-1
YLR189C	0	0
YIL150C	-1	0
YLR349W	0	0
YHL046C	0	0
YBR212W	0	0
YJR109C	1	0
YLR254C	0	1
YGR085C	1	0
YPL105C	1	0
YGR145W	0	-1
YGR110W	0	1
YKL177W	0	0
YGL154C	0	0
YBR129C	0	0
YCRX10W	0	-1
YDL215C	-1	1
YKL099C	0	0
YDR315C	-1	0
YLR394W	-1	0
YNL104C	0	0
YNL151C	0	0
YNR066C	0	0
YLR220W	0	0
YHR006W	-1	0
YMR232W	0	0
YNL083W	0	0
YER168C	0	0
YPL265W	0	1
YOR227W	0	0
YOR081C	0	-1
YEL026W	1	-1
YGR050C	0	0
YDR021W	-1	0
YGL063W	0	0
YPL212C	1	-1
YOL157C	0	1
YOR345C	0	-1
YPR095C	-1	0
YOR310C	1	-1
YDR188W	0	0
YAL027W	0	0
YGL236C	0	0
YHR133C	1	-1
YDR017C	0	0
YAR061W	0	0
YIL090W	1	0
YBR183W	0	0
YOL048C	-1	0
YML039W	1	0
YCR007C	-1	1
YGR290W	-1	0
YEL004W	0	0
YPR057W	0	0
YLL032C	0	0
YDR116C	-1	0
YDR299W	0	0
YLR030W	0	0
YDR122W	-1	0
YOL062C	0	0
YNL234W	1	0
YLR467W	0	0
YJL194W	0	1
YOL015W	0	0
YDL070W	-1	0
YOR241W	0	0
YLR056W	1	1
YPR039W	0	0
YKL110C	0	0
YML100W-A	0	0
YCLX07W	0	0
YNL255C	0	0
YLR204W	-1	1
YML097C	0	0
YKR007W	0	0
YDL096C	0	-1
YHR193C	0	0
YBL099W	-1	1
YOR126C	0	1
YMR023C	0	0
YOR119C	0	0
YNL187W	-1	0
YMR141C	-1	0
YLL014W	0	0
YCL045C	0	-1
YCL050C	1	-1
YCR061W	0	0
YOR199W	0	0
YPR115W	0	1
YHR088W	0	0
YCLX03C	0	0
YPR162C	0	0
YGR166W	0	0
YDL161W	0	0
YKL050C	0	0
YJR055W	1	1
YGL099W	0	-1
YFL030W	-1	1
YIL119C	-1	1
YPL193W	0	0
YNL005C	0	1
YGL217C	0	-1
YJL144W	0	1
YBR012W-B	-1	0
YBR012W-A	0	0
YJR139C	1	-1
YBR133C	0	0
YBR162C	1	0
YOR130C	0	0
YJL079C	-1	1
YGL019W	0	-1
YGR201C	0	1
YNL172W	0	0
YNL058C	0	-1
YPL160W	0	-1
YNL023C	1	0
YDR214W	0	0
YIL126W	0	0
YLR295C	0	0
YHR168W	0	0
YOR064C	0	1
YNL318C	0	0
YCL021W	0	-1
YOL081W	1	0
YOL036W	0	0
YGL148W	0	-1
YOR031W	0	1
YBR282W	0	0
YDR194C	0	0
YOL114C	1	0
YNL257C	0	0
YNR030W	0	0
YKL076C	0	0
YDR466W	0	1
YFR045W	0	1
YIL002C	0	0
YGR159C	1	-1
YGL089C	1	1
YFR032C	0	0
YNL118C	-1	0
YGL228W	0	0
YJR117W	0	0
YLR357W	0	-1
YCLX12W	0	0
YER127W	1	0
YBL015W	-1	1
YLR017W	1	-1
YHR110W	0	0
YBR041W	0	0
YOR394W	-1	0
YCR044C	1	0
YDL039C	0	0
YKL202W	-1	0
YOR264W	0	0
YGL173C	0	0
YOR366W	0	0
YNL275W	0	0
YAR015W	0	0
YOR384W	0	1
YLL051C	1	1
YDR395W	0	0
YAR040C	0	0
YLR079W	0	0
YLR408C	0	0
YMR093W	0	-1
YMR042W	0	0
YDR079W	-1	0
YMR268C	0	0
YOR169C	1	-1
YML070W	0	0
YPR072W	0	0
YMR108W	0	0
YCR091W	-1	0
YER062C	-1	1
YDR244W	-1	0
YER189W	0	1
YJL009W	1	-1
YDL137W	0	0
YGR271W	1	0
YDR233C	0	0
YGL046W	-1	0
YGR071C	0	0
YCR106W	0	0
YBL100C	-1	1
YER109C	0	0
YDR489W	0	0
YPL282C	0	0
YPR049C	0	1
YDL057W	0	0
YPR014C	0	0
YGR257C	0	1
YEL045C	0	0
YPL235W	0	-1
YBL042C	0	0
YLR122C	0	1
YLR155C	0	0
YBL087C	1	-1
YJL132W	-1	1
YGL190C	0	0
YBR110W	-1	0
YDR144C	1	-1
YOR180C	0	0
YFL046W	0	0
YOR103C	0	-1
YKL137W	0	0
YDR447C	0	-1
YAL061W	0	1
YNL324W	0	1
YPR145W	1	-1
YJL063C	0	0
YPL021W	0	0
YIR010W	0	0
YDR331W	0	0
YJL114W	0	1
YKR044W	0	0
YLR433C	0	-1
YMR068W	0	0
YCLX05C	0	0
YFL068W	0	1
YER032W	0	0
YJR070C	0	-1
YGL005C	0	1
YHR043C	0	0
YDL111C	0	0
YMR133W	-1	1
YPL007C	0	0
YKL159C	0	0
YDR059C	0	0
YBR101C	1	0
YLR396C	-1	0
YBR245C	0	0
YJL216C	-1	0
YBR210W	0	0
YPL103C	0	0
YIL103W	0	0
YIL152W	-1	0
YJR096W	-1	1
YGR143W	-1	0
YGR112W	-1	1
YLR256W	0	0
YCRX12W	0	0
YHR174W	1	-1
YOR012W	1	0
YIR001C	0	0
YDL213C	1	1
YDR317W	0	0
YDR478W	0	0
YKL097C	0	0
YNL106C	0	-1
YOR378W	-1	0
YFR015C	-1	0
YMR230W	0	0
YIL092W	1	1
YAR009C	0	0
YLR453C	0	1
YBR004C	0	1
YGR052W	0	1
YJR161C	0	0
YOR278W	0	0
YNL182C	1	-1
YNL085W	0	-1
YGL061C	0	0
YPL210C	0	-1
YOR087W	0	-1
YGL234W	0	-1
YOR347C	0	0
YPR093C	0	1
YAL029C	1	0
YOL155C	0	-1
YDR421W	0	0
YGR186W	0	0
YDR294C	0	0
YHR135C	0	0
YDR015C	1	0
YBR181C	0	-1
YOR078W	0	0
YOR243C	0	-1
YMR165C	0	0
YCR058C	0	-1
YCR005C	1	0
YGR296W	0	0
YPR055W	1	0
YHR037W	0	0
YLR032W	0	0
YDR114C	-1	0
YLL030C	-1	0
YLL065W	-1	0
YBR099C	0	0
YBL027W	0	0
YOL060C	0	0
YNL208W	0	0
YNL232W	0	0
YDL076C	0	0
YOR225W	0	1
YDR120C	-1	0
YLR465C	-1	0
YJL192C	1	0
YLR054C	0	1
YLR009W	0	-1
YDR063W	1	0
YOR352W	1	0
YGR238C	0	0
YLR423C	-1	0
YDR278C	0	0
YLR105C	0	0
YML091C	0	1
YHR191C	0	0
YDL098C	0	0
YLR202C	0	0
YKR005C	0	0
YMR143W	1	-1
YCR063W	-1	0
YNL189W	-1	-1
YCL047C	0	0
YGL122C	0	0
YDL018C	0	1
YNL303W	0	-1
YPR160W	-1	0
YBL060W	0	0
YBR019C	-1	-1
YKL056C	1	-1
YGR160W	0	-1
YDL163W	0	0
YPL068C	-1	0
YJR057W	0	0
YKL178C	0	1
YFL032W	0	0
YLR377C	-1	1
YBL063W	0	0
YAL059W	0	0
YNL007C	0	0
YPL148C	0	1
YJR137C	0	-1
YMR021C	0	0
YMR074C	0	0
YDR378C	0	0
YJR039W	0	0
YDL158C	0	0
YNL323W	1	0
YFL009W	1	0
YLR297W	0	1
YLR279W	0	0
YDR216W	0	0
YIL120W	0	1
YNL021W	0	0
YGR095C	1	-1
YCL027W	1	-1
YHR029C	1	0
YAL033W	1	0
YBR284W	-1	0
YNR036C	0	0
YNR049C	0	0
YDR192C	0	0
YOL112W	1	0
YML109W	0	0
YOL083W	-1	0
YNL251C	1	0
YBR266C	0	0
YBL004W	0	0
YBR164C	0	0
YHR074W	0	0
YDR464W	1	-1
YFR030W	0	0
YBR131W	0	0
YKL078W	1	-1
YIL055C	0	1
YPL053C	0	0
YLR351C	0	0
YNR014W	0	1
YER125W	1	-1
YER152C	0	0
YLR015W	0	0
YHR116W	-1	0
YPL259C	-1	0
YKL200C	0	0
YGR093W	1	0
YDL037C	1	0
YLR334C	1	0
YHL043W	-1	1
YOR364W	0	-1
YOR386W	-1	1
YDR397C	0	0
YPR198W	1	0
YHL038C	-1	0
YLL053C	0	1
YDR425W	0	0
YOR331C	1	-1
YML076C	0	0
YKR060W	0	0
YHR094C	0	-1
YER069W	0	0
YMR091C	0	-1
YER012W	0	0
YHR098C	-1	-1
YDL135C	0	0
YCR093W	0	0
YGR273C	0	0
YBR069C	0	0
YGR077C	0	0
YCR104W	0	0
YDR040C	0	0
YPR012W	0	0
YGR255C	0	0
YDL051W	0	-1
YBL102W	0	0
YPL237W	0	0
YLR120C	0	0
YEL043W	0	-1
YNL068C	0	0
YJL169W	0	0
YAL043C-A	0	0
YDR146C	0	0
YBR112C	0	0
YBL081W	0	0
YFL040W	-1	0
YNL326C	0	0
YDR337W	-1	0
YJL061W	0	0
YPR147C	0	0
YKL131W	0	0
YDR441C	0	1
YPL094C	0	-1
YPL023C	0	0
YDR231C	-1	1
YJL112W	0	1
YFL066C	0	1
YNL193W	-1	0
YML058W	1	-1
YBR188C	0	0
YER034W	0	0
YJR076C	0	0
YKL157W	0	0
YBR003W	1	-1
YPR129W	1	0
YDL113C	0	0
YMR135C	-1	1
YGL007W	0	0
YPL005W	-1	0
YBR247C	1	-1
YLR185W	-1	-1
YJL210W	0	0
YLR398C	0	0
YIL154C	0	0
YIL101C	-1	1
YKL004W	1	0
YOR208W	1	0
YPL154C	0	1
YLR258W	-1	1
YBR178W	0	0
YJR098C	-1	0
YCRX14W	0	-1
YHR176W	-1	1
YJR018W	0	0
YDL211C	0	0
YDL244W	0	1
YDR319C	0	0
YKL095W	0	0
YOL099C	-1	1
YIL094C	1	1
YLR451W	0	0
YFR017C	-1	1
YGR084C	-1	0
YHR017W	0	0
YNR077C	0	0
YOL044W	0	0
YLR323C	0	0
YOR085W	1	-1
YGR054W	1	-1
YOR050C	0	1
YNL087W	0	0
YGR114C	0	0
YLR318W	1	0
YOR341W	1	0
YDR296W	0	0
YGL232W	0	0
YPR091C	0	0
YGR141W	-1	0
YAR030C	0	0
YJR158W	-1	1
YHR137W	-1	1
YBR187W	1	-1
YMR198W	0	0
YCR003W	-1	0
YMR316C-B	-1	0
YMR316C-A	1	-1
YMR163C	0	0
YGR294W	1	0
YEL008W	1	0
YLL067C	-1	0
YBR020W	-1	-1
YLR418C	0	0
YDR112W	0	0
YER059W	0	0
YPL153C	0	0
YBL025W	0	0
YOL066C	0	0
YDR126W	0	0
YGL167C	0	0
YOR223W	-1	0
YEL022W	1	1
YIL053W	1	-1
YDL074C	0	0
YLR463C	0	0
YJL190C	1	-1
YMR218C	0	0
YNL265C	0	0
YNL230C	0	0
YLL049W	0	0
YHR211W	-1	1
YPR166C	0	0
YJL042W	0	0
YNL301C	1	-1
YDR445C	0	0
YMR058W	0	0
YDR061W	0	0
YOR290C	0	0
YKL114C	0	0
YML024W	0	-1
YML093W	1	0
YHR197W	0	-1
YDR276C	0	1
YLR200W	0	0
YKR003W	0	0
YLR107W	0	0
YER175C	0	1
YKL135C	0	0
YDL183C	0	1
YPL278C	0	1
YMR118C	0	1
YCL049C	0	0
YBL066C	0	0
YGL120C	-1	-1
YDR169C	0	1
YOR057W	0	0
YLR169W	0	0
YMR272C	0	-1
YPR108W	0	-1
YKL054C	0	-1
YGR162W	0	-1
YDL165W	0	0
YDR032C	-1	1
YKL023W	-1	0
YJR051W	0	0
YNL009W	0	1
YFL034W	0	0
YJR135C	-1	0
YGL213C	0	-1
YMR076C	0	0
YGR205W	-1	1
YJR037W	0	0
YNL027W	0	0
YLR291C	1	-1
YDR210W	1	0
YIL122W	0	1
YDL230W	1	0
YJR113C	-1	0
YGL075C	0	0
YIR026C	0	-1
YBR286W-1150	1	1
YLR416C	0	0
YGR097W	0	0
YIL068C	0	0
YCL025C	-1	1
YNR034W	-1	0
YOL085C	-1	0
YNL282W	0	0
YBR286W	0	0
YGL144C	0	0
YDR190C	0	0
YAL031C	0	0
YBL006C	0	0
YGR108W	0	0
YBR264C	0	1
YBR231C	0	0
YPL197C	1	-1
YBR166C	0	0
YDR462W	0	1
YJL148W	0	0
YIL057C	-1	1
YPL055C	-1	0
YLR353W	0	0
YIL148W	0	-1
YNR016C	0	0
YFR036W	0	0
YHR114W	0	0
YGR028W	0	0
YER150W	-1	1
YNL279W	-1	0
YCL034W	0	0
YAR044W	0	0
YDL068W	-1	0
YOL027C	0	0
YPL257W	-1	0
YPL120W	0	1
YOL145C	1	0
YJL099W	0	0
YOL110W	0	0
YDR005C	0	0
YMR311C	0	1
YHL041W	-1	0
YBL039C	1	-1
YGR188C	0	0
YOR362C	0	0
YLR126C	0	1
YDL053C	-1	0
YML074C	0	-1
YKR062W	-1	0
YBR235W	0	0
YER010C	0	0
YML003W	0	0
YMR097C	0	0
YDL133W	0	0
YOR131C	0	0
YGR228W	-1	0
YHR096C	-1	1
YBR008C	0	0
YDL035C	0	0
YMR253C	0	1
YCR102C	0	0
YOR257W	0	0
YGR002C	0	0
YDR042C	0	1
YGR075C	-1	0
YGR253C	0	0
YDR510W	0	0
YEL014C	1	0
YDR467C	0	0
YPR045C	0	0
YPR010C	0	-1
YPL231W	0	-1
YLR148W	0	0
YMR137C	0	1
YDL082W	1	-1
YKL155C	0	0
YBR162W-A	0	0
YFL042C	-1	0
YGL030W	0	-1
YBL083C	0	0
YDR148C	-1	1
YPL096W	0	0
YDR335W	0	0
YPR141C	0	0
YJL067W	0	0
YMR039C	0	0
YDR342C	-1	1
YPL078C	-1	1
YCR095C	-1	0
YLL011W	1	-1
YCL053C	0	-1
YBR286W-450	1	-1
YLR437C	1	-1
YFL064C	0	1
YNL191W	-1	0
YDR237W	0	0
YJL110C	0	0
YKR048C	0	0
YBR001C	-1	0
YPL003W	-1	0
YKL108W	0	0
YJR094C	-1	0
YJR074W	0	1
YPR127W	0	1
YDL148C	1	0
YAL012W	1	-1
YMR288W	0	0
YIL156W	-1	0
YBR241C	-1	1
YKL006W	1	-1
YPL156C	-1	1
YOR153W	1	-1
YLR187W	-1	0
YDR099W	0	0
YKL133C	0	1
YKL188C	0	1
YHR170W	1	-1
YDR259C	-1	1
YCRX16C	0	0
YKL068W	0	0
YGR098C	1	-1
YKL093W	-1	1
YMR002W	-1	0
YLR261C	0	0
YDL246C	0	0
YER081W	0	0
YPL178W	0	0
YMR172C-A	0	0
YPR202W	0	0
YIL096C	1	0
YOL046C	1	-1
YFR011C	-1	1
YIL074C	1	-1
YHL008C	0	0
YLR457C	0	0
YNL249C	0	0
YGR056W	1	0
YGL065C	0	-1
YOR052C	0	1
YBR012C	0	0
YGR116W	0	0
YOR343C	0	1
YGL230C	-1	0
YOL159C	1	0
YBR185C	0	1
YOR010C	1	0
YDR290W	0	0
YDR019C	0	0
YBR150C	0	1
YIR042C	0	0
YER119C	0	1
YMR196W	0	1
YMR161W	0	0
YCR001W	0	-1
YCR054C	0	0
YBL093C	0	0
YMR322C	-1	1
YJR120W	-1	0
YLL061W	0	1
YDR110W	0	0
YDR419W	0	0
YOR221C	0	0
YPL214C	0	1
YGL165C	0	0
YOL064C	1	-1
YBL023C	0	0
YOR274W	0	0
YHR213W	0	0
YOR329C	0	0
YLR005W	0	0
YDR124W	-1	1
YNL267W	0	0
YBR134W	-1	0
YLL047W	0	0
YLR461W	0	0
YLR050C	1	0
YNL307C	0	-1
YDR067C	0	0
YMR056C	0	1
YJL044C	0	0
YCLX09W	-1	1
YPR164W	1	0
YEL060C	-1	1
YHR195W	0	0
YLR101C	0	0
YML026C	1	-1
YPR066W	0	0
YDR229W	0	0
YDL181W	-1	1
YBR022W	0	0
YER177W	0	0
YML048W	0	0
YBL064C	-1	1
YIL045W	-1	1
YKL221W	0	0
YGL126W	0	0
YLR167W	0	-1
YMR270C	0	0
YLR293C	1	-1
YLR228C	0	0
YJR053W	0	0
YJL171C	0	0
YPL031C	0	-1
YKL021C	0	-1
YER0441C	0	1
YDL167C	0	-1
YLR388W	0	-1
YLR373C	0	0
YJR035W	0	1
YKR054C	0	0
YIR034C	0	0
YGL013C	0	0
YMR070W	0	0
YGR207C	-1	1
YDR212W	1	0
YNL052W	-1	1
YGL188C	0	1
YNL025C	1	0
YGR091W	0	0
YDL232W	0	0
YPL119C	0	0
YLR242C	1	0
YMR031W-A	0	-1
YJR148W	0	0
YLL062C	0	0
YOL087C	-1	0
YNL134C	-1	1
YAL037W	0	0
YGL146C	-1	1
YCR051W	0	-1
YBR262C	-1	1
YPL199C	-1	0
YFL036W	0	0
YJR133W	0	0
YIL051C	0	0
YPL057C	0	0
YNR010W	0	0
YDR365C	0	-1
YLR308W	0	0
YNL169C	1	0
YFR034C	0	-1
YHR070W	0	-1
YDR460W	0	0
YNL112W	1	-1
YHL047C	-1	1
YOR360C	1	0
YOR335C	1	-1
YGL251C	0	-1
YER156C	0	-1
YPL255W	0	-1
YOR095C	0	0
YEL038W	0	0
YDR392W	-1	0
YOL025W	0	1
YPL208W	0	0
YOL147C	1	1
YNL280C	1	0
YDR007W	0	0
YIL160C	-1	1
YPR089W	0	0
YBR233W	0	0
YPL122C	1	0
YDL086W	0	0
YMR313C	0	0
YGL179C	0	0
YGR120C	0	0
YML001W	1	0
YLL028W	0	0
YER016W	0	0
YHR061C	0	0
YDR438W	0	0
YNL211C	1	0
YLR124W	0	0
YLR026C	0	0
YJR065C	1	0
YDL131W	0	0
YMR095C	0	0
YER138C	0	0
YDL033C	1	1
YMR255W	0	-1
YHR209W	0	-1
YGL247W	0	0
YCR100C	-1	0
YEL0171C	0	0
YDR516C	-1	-1
YPL233W	0	0
YOR255W	0	0
YHR024C	0	0
YOR200W	0	0
YGR251W	1	0
YPR047W	0	1
YDR044W	1	0
YEL016C	1	0
YOL128C	1	0
YDL151C	0	-1
YKL153W	0	-1
YFL019C	0	0
YMR139W	0	0
YDL080C	0	0
YOR172W	0	-1
YOR105W	-1	0
YDR541C	0	0
YPR143W	0	0
YDR340W	0	0
YNL322C	0	0
YPL090C	0	-1
YPR078C	0	0
YBL058W	0	-1
YFL062W	0	0
YNL197C	0	0
YLR439W	-1	0
YCR020C	0	-1
YDR450W	1	0
YCL051W	0	0
YCR097W	0	0
YLL013C	-1	0
YER038C	0	0
YPR125W	1	0
YHR049W	0	0
YBR007C	0	-1
YPL001W	0	0
YJL038C	0	0
YNL319W	0	1
YPR178W	0	0
YNL159C	0	0
YAL014C	0	0
YBR243C	0	0
YLR181C	1	0
YBL056W	0	0
YNL075W	1	0
YPL150W	1	1
YJL065C	1	0
YKR020W	0	0
YMR053C	-1	1
YBR286W-950	0	1
YKL066W	0	1
YMR004W	0	0
YER083C	0	-1
YPL176C	-1	0
YHR172W	1	0
YLR263W	0	0
YDL240W	0	0
YDR401W	0	-1
YFR013W	0	0
YHR013C	0	0
YOL040C	0	-1
YGR072W	0	0
YCL035C	0	1
YIL023C	0	0
YNR073C	0	0
YPR200C	0	0
YLR327C	-1	1
YBR229C	-1	0
YML133C	0	0
YLR455W	0	0
YNL247W	1	0
YOR054C	0	1
YFR028C	0	0
YBR005W	-1	0
YBR152W	0	0
YOR072W	-1	0
YDR292C	0	0
YKR103W	-1	0
YMR194W	0	-1
YMR167W	-1	0
YOR249C	0	0
YER117W	1	0
YOR301W	0	-1
YKL218C	-1	0
YBR039W	-1	1
YCR056W	0	-1
YLL063C	0	1
YAR070C	0	1
YOR276W	1	0
YMR309C	0	-1
YOR089C	0	0
YMR180C	0	0
YGL163C	0	0
YDR417C	0	-1
YOL131W	0	0
YDL056W	0	0
YBL021C	0	1
YHR215W	1	-1
YLL045C	1	-1
YLR156W	0	1
YLR007W	1	0
YNL261W	1	0
YMR054W	0	0
YDR065W	0	0
YNL305C	0	1
YJL046W	0	1
YKR078W	1	0
YOR191W	0	1
YDR272W	0	1
YGR289C	0	0
YML020W	0	0
YLR103C	0	0
YOR294W	1	0
YEL062W	-1	0
YPR064W	0	0
YPR031W	0	0
YLR038C	-1	1
YPR085C	-1	0
YML032C-A	0	0
YNL096C	1	-1
YDR038C	0	0
YDL187C	0	0
YBR024W	0	0
YER171W	0	0
YDL047W	-1	0
YML046W	0	0
YGL124C	0	0
YMR276W	0	0
YEL059W	1	0
YMR149W	1	-1
YLR165C	0	1
YCR069W	0	0
YKL223W	0	0
YLR138W	1	0
YKL027W	0	0
YJL173C	0	0
YDR152W	1	0
YBR286W-1500	0	-1
YKL127W	0	-1
YDR309C	0	-1
YLR386W	-1	0
YLR371W	0	0
YDL169C	-1	1
YLR092W	0	0
YER044C	0	0
YMR072W	-1	0
YJR033C	0	0
YKR056W	0	-1
YGL011C	0	0
YIR036C	-1	1
YMR123W	1	-1
YGR073C	0	0
YGR209C	1	1
YNL050C	0	-1
YMR304C-A	-1	0
YLR240W	0	0
YOR039W	0	0
YDL234C	0	0
YGL080W	0	1
YNL136W	-1	0
YKL049C	0	0
YBL002W	-1	0
YNR038W	0	-1
YBR037C	0	0
YGL140C	0	0
YCL029C	0	0
YFL038C	0	0
YJR131W	0	0
YNR012W	0	0
YNL110C	0	0
YAL068C	0	0
YDR367W	0	0
YHR072W	0	-1
YPL059W	1	0
YGL253W	0	-1
YHL032C	-1	1
YAR002C-A	0	0
YHL045W	0	0
YOR337W	1	0
YOR097C	-1	0
YHR118C	0	-1
YGR024C	1	0
YOL023W	0	1
YPL253C	-1	0
YOR259C	0	0
YER154W	0	0
YBR300C	0	0
YEL036C	-1	0
YBR260C	0	0
YPL124W	0	0
YAL042W	0	0
YAL035W	0	-1
YNL286W	0	0
YDR001C	-1	0
YIL162W	-1	-1
YOL141W	1	0
YHR145C	0	0
YBR195C	0	0
YIL039W	1	0
YGR122W	0	0
YMR315W	-1	0
YPL029W	0	0
YDR384C	1	-1
YML007W	1	0
YER063W	0	0
YDR481C	0	-1
YER014W	0	1
YPR041W	0	-1
YNL213C	0	0
YKL006C-A	1	-1
YBR058C	0	0
YLR024C	0	0
YLR071C	0	0
YHR092C	0	0
YDL199C	0	1
YHL007C	0	0
YML013C-A	1	0
YER181C	0	0
YNL228W	0	0
YDR057W	0	1
YDL064W	0	0
YDL031W	0	0
YMR257C	0	0
YBL108W	0	0
YDR514C	0	0
YOR253W	0	-1
YOR202W	0	-1
YEL010W	0	0
YGL245W	0	-1
YGR006W	0	0
YGR079W	0	-1
YDL119C	0	0
YKL151C	-1	1
YGL198W	0	0
YKL104C	1	0
YOR170W	0	0
YHR038W	0	0
YML069W	0	0
YKR019C	0	0
YJR073C	-1	1
YGR279C	0	1
YCR073C	0	0
YCR022C	0	0
YLL015W	0	0
YNL195C	-1	1
YFL060C	-1	1
YDR173C	-1	0
YMR100W	0	0
YCL057W	0	0
YBR072W	-1	1
YCLX11W	0	0
YPR123C	0	1
YDL173W	0	0
YJR047C	1	-1
YMR006C	0	0
YAL016W	0	0
YHR011W	0	0
YPL152W	0	0
YLR183C	-1	0
YNL077W	1	0
YBR109C	0	0
YBR172C	0	0
YDR346C	1	0
YJL010C	0	0
YPL092W	0	1
YGR213C	0	0
YBR236C	0	0
YNL019C	0	0
YDL242W	0	0
YER085C	0	0
YKL039W	0	0
YKL064W	-1	0
YLR265C	0	0
YKR022C	-1	0
YLR287C	1	0
YPL174C	0	1
YOR070C	-1	-1
YDR403W	-1	1
YOL093W	0	0
YOL042W	0	0
YBR189W	1	-1
YCL037C	0	-1
YIL025C	1	0
YNR071C	1	0
YML131W	-1	1
YNL245C	0	0
YNR024W	0	0
YOL108C	0	0
YLR329W	0	0
YPL043W	1	-1
YMR294W-A	-1	0
YKL002W	0	1
YDR328C	0	0
YIR009W	0	0
YCRX07W	0	0
YBR154C	0	0
YLR001C	0	0
YKR101W	0	1
YER115C	0	1
YHR124W	-1	-1
YER148W	0	-1
YCR050C	1	0
YMR240C	0	0
YOR303W	-1	1
YIL087C	-1	1
YMR192W	0	0
YCL074W	0	0
YJL221C	-1	0
YMR229C	0	-1
YLL038C	1	0
YOR056C	0	0
YFL013W-A	1	-1
YOR270C	1	-1
YPR069C	0	0
YOL068C	0	0
YMR182C	-1	0
YBR201W	-1	0
YLL043W	0	0
YDR415C	0	0
YGL161C	0	0
YOL133W	0	0
YNL263C	1	0
YHR217C	0	1
YDR128W	0	0
YMR274C	1	-1
YER028C	1	1
YMR052W	-1	1
YMR203W	0	0
YKR076W	-1	1
YBR017C	0	-1
YDR225W	0	0
YDR270W	0	1
YPR033C	0	0
YGR230W	0	1
YPR062W	0	0
YDR528W	0	0
YER173W	0	0
YBR026C	0	1
YDL185W	0	-1
YBR091C	0	0
YNL094W	0	0
YGR047C	-1	0
YPL227C	1	-1
YDL010W	0	1
YML019W	0	0
YDL045C	0	0
YLR163C	0	0
YLR178C	-1	1
YKL225W	0	0
YJL175W	0	0
YBR286W-500	0	0
YBL079W	0	0
YNL056W	0	0
YFL001W	0	0
YDR150W	0	0
YKL125W	0	-1
YKL170W	0	1
YPR157W	1	0
YLR384C	0	0
YDR307W	0	0
YML099C	0	0
YLR421C	0	0
YLR090W	0	1
YDL212W	1	0
YJR064W	0	-1
YML022W	0	-1
YER046W	0	1
YMR029C	-1	0
YIR030C	0	0
YKR050W	0	0
YMR121C	0	-1
YGL017W	0	0
YDL150W	0	0
YNL038W	0	0
YHR001W-A	0	1
YOL165C	0	0
YIL139C	0	0
YLR246W	0	1
YJR119C	-1	1
YLR359W	1	0
YLR199C	0	-1
YJL206C	0	1
YIL142W	0	-1
YGL082W	0	0
YNL138W	0	0
YDL236W	0	0
YGL142C	0	0
YGR179C	0	0
YJR086W	-1	0
YBR139W	0	1
YHR188C	0	0
YNL116W	-1	0
YJR087W	0	0
YDR361C	0	0
YLR445W	0	0
YJR080C	0	1
YGL255W	0	0
YFR007W	0	0
YLR333C	0	-1
YHR103W	0	0
YHL030W	0	0
YGL077C	0	-1
YPL204W	0	0
YLR379W	0	0
YIL009C-A	1	0
YBR302C	0	0
YOR091W	1	-1
YGR026W	0	0
YAL040C	0	0
YDR288W	0	0
YGL208W	-1	1
YNL284C	-1	0
YIL164C	0	0
YOL143C	1	-1
YBR237W	0	0
YBR197C	0	0
YHR147C	0	1
YJL093C	0	0
YDR003W	-1	-1
YMR317W	0	-1
YOR251C	0	0
YPR181C	-1	-1
YCL008C	0	0
YML005W	1	0
YNL215W	0	0
YDL059C	-1	-1
YOR204W	1	-1
YEL012W	0	1
YBL040C	0	0
YPR043W	1	0
YDR382W	0	-1
YDR483W	0	0
YER061C	0	0
YLR022C	0	0
YLR402W	-1	0
YLR073C	1	-1
YER183C	0	0
YHR090C	-1	0
YOL021C	1	0
YHR030C	0	0
YOL074C	0	0
YBR295W	-1	0
YDR143C	0	0
YIL011W	1	-1
YEL034W	0	0
YHL015W	0	-1
YNR050C	1	1
YDR134C	-1	0
YKL208W	0	0
YGR004W	0	0
YML110C	0	1
YGL048C	0	0
YGL243W	0	0
YKL106W	1	0
YPR029C	1	0
YJL034W	1	-1
YFL048C	0	0
YLR117C	0	0
YOR176W	0	-1
YOR109W	0	-1
YBL089W	0	0
YDL084W	0	0
YCL055W	0	0
YGL116W	-1	0
YBL054W	0	0
YCR024C	-1	0
YMR102C	0	0
YCR071C	0	0
YDR175C	0	0
YOR189W	0	0
YOR154W	0	0
YPR121W	0	0
YBR070C	0	0
YLL017W	-1	1
YOR280C	0	0
YNL315C	-1	0
YPR174C	0	0
YJR045C	0	0
YMR008C	0	1
YDR349C	0	0
YDL171C	0	0
YKL062W	-1	1
YJR010W	0	0
YJL218W	0	1
YLR222C	0	-1
YDR093W	0	0
YMR282C	0	0
YIL109C	0	-1
YFL022C	0	-1
YPL109C	-1	1
YJL156C	0	0
YNL071W	0	0
YMR088C	1	0
YGR211W	1	-1
YKL139W	0	0
YJL069C	1	-1
YDR344C	0	0
YJL016W	0	0
YDR332W	0	1
YER087W	0	0
YLR285W	1	-1
YLR267W	0	0
YDL219W	0	0
YNL017C	0	0
YCR024C-A	1	0
YDR206W	0	0
YKR024C	0	-1
YBR156C	0	-1
YOR076C	0	0
YEL059C-A	0	1
YDR405W	-1	0
YOL091W	0	0
YCL031C	0	0
YIL027C	1	0
YBR286W-1250	0	0
YLR459W	1	0
YNL243W	0	0
YNR026C	0	0
YHL044W	0	0
YPR204W	0	0
YOR311C	0	0
YHR068W	1	-1
YGR149W	-1	0
YDR458C	0	1
YFR024C	0	0
YKL193C	0	0
YCRX05W	0	0
YOR135C	-1	1
YLR310C	-1	0
YNR008W	0	0
YJR150C	1	0
YFL011W	-1	1
YLR003C	1	-1
YER113C	0	0
YHR122W	0	-1
YHL017W	1	0
YJR010C-A	0	0
YIL085C	0	0
YMR190C	0	0
YAR074C	0	-1
YCR052W	0	-1
YOR272W	1	0
YOR058C	0	0
YAL064W-B	0	0
YDR413C	0	-1
YBR203W	-1	1
YAR029W	0	0
YNL238W	0	0
YJL198W	1	-1
YOL135C	0	0
YOR323C	0	-1
YLL041C	-1	1
YAR052C	0	0
YKR074W	1	0
YOR193W	0	0
YER026C	0	1
YMR201C	1	0
YLR069C	0	0
YML042W	-1	1
YMR050C	0	0
YDR069C	0	0
YGR232W	0	0
YEL066W	0	0
YPR035W	0	-1
YDR014W	-1	0
YDR227W	0	0
YPR060C	0	-1
YHL039W	0	0
YCR038C	0	0
YOR157C	-1	-1
YCR072C	1	0
YBR093C	0	-1
YBL112C	0	0
YDR034C	0	0
YGR045C	-1	1
YLR134W	1	-1
YLR161W	-1	0
YPL225W	0	0
YDL043C	0	0
YDL012C	0	0
YDR218C	0	0
YLR299W	-1	0
YJL177W	0	-1
YGL139W	1	0
YNL054W	0	0
YDR156W	1	0
YPL062W	0	1
YPR155C	0	1
YOR137C	0	0
YKL123W	0	0
YKL172W	0	0
YNL336W	0	0
YDR305C	0	0
YJR059W	0	0
YPR100W	0	1
YDR358W	-1	1
YLR096W	0	0
YKR052C	0	1
YPR107C	0	0
YLR427W	1	0
YIR032C	0	0
YGL015C	-1	0
YEL064C	-1	1
YMR127C	0	0
YIL140W	0	0
YOL163W	0	0
YLR197W	0	-1
YJL215C	0	0
YAL064W	0	0
YJL204C	1	0
YLR244C	1	-1
YLR255C	0	0
YJR084W	-1	0
YLR233C	0	0
YDL238C	0	0
YGL084C	0	1
YLR382C	-1	0
YLR219W	0	0
YDR363W	0	0
YNL114C	0	-1
YNL163C	1	0
YFR005C	0	0
YHR009C	-1	0
YFR050C	0	0
YLR447C	1	-1
YNR069C	0	0
YOL058W	1	0
YAR019C	0	0
YOR024W	0	0
YML129C	0	1
YGL257C	-1	0
YGR020C	0	0
YOR093C	0	0
YAL046C	-1	0
YOR392W	0	0
YAL039C	-1	0
YIL166C	0	1
YLR403W	0	0
YOL118C	0	1
YDR286C	0	0
YHR141C	1	0
YPL128C	0	0
YJL091C	0	0
YBR191W	1	-1
YDR380W	-1	1
YGR191W	1	0
YGL056C	0	0
YDR485C	0	0
YPL239W	-1	0
YPR183W	0	0
YOR206W	1	-1
YEL049W	0	0
YOR391C	1	1
YBR089W	-1	0
YLR075W	0	-1
YBR054W	-1	1
YLR020C	0	0
YNL217W	0	0
YLR404W	0	0
YIL013C	-1	0
YPL206C	0	0
YDL060W	0	0
YPR084W	0	0
YBR293W	0	0
YNR052C	0	0
YHR032W	0	0
YEL032W	0	0
YOL076W	1	0
YDR136C	-1	0
YHR203C	0	-1
YML112W	1	0
YGL241W	0	-1
YOL014W	1	-1
YPR176C	0	0
YKL100C	0	1
YJL036W	0	0
YER009W	0	-1
YBR286W-750	0	0
YLR115W	0	0
YLR140W	0	0
YGL114W	0	0
YER167W	0	0
YMR104C	-1	1
YER185W	0	1
YDL195W	0	-1
YNL199C	0	0
YCR026C	0	0
YMR246W	0	-1
YBR076W	0	0
YNL317W	0	0
YLL019C	-1	1
YDR177W	0	0
YHR052W	1	0
YKR026C	0	0
YJR043C	0	0
YJR012C	0	0
YKL060C	1	-1
YCL068C	0	0
YKL035W	0	0
YNL073W	0	0
YMR280C	0	0
YFL020C	0	0
YNL328C	0	0
YJL014W	1	-1
YMR031C	-1	0
YOR174W	0	0
YPR149W	0	1
YBR286W-1350	1	0
YNL015W	-1	1
YCR084C	0	-1
YHR178W	-1	0
YPL187W	0	0
YLR283W	0	0
YPL170W	0	0
YPR001W	0	1
YDR204W	-1	1
YDR251W	0	0
YNL048W	0	0
YOR074C	0	0
YDR347W	0	0
YJR152W	0	1
YKL025C	0	0
YFR014C	-1	1
YOR003W	1	0
YOL097C	0	-1
YOR110W	0	1
YDR407C	0	-1
YNR020C	0	0
YBR258C	0	0
YNL146W	0	0
YFR019W	0	0
YBR223C	-1	0
YNL241C	0	0
YJL154C	0	0
YDR091C	1	-1
YJL123C	0	0
YIR005W	0	0
YPL047W	0	0
YER086W	0	-1
YLR287C-A	1	0
YBR176W	0	0
YDR207C	0	0
YFR026C	0	1
YPL036W	0	0
YGL238W	1	-1
YJL165C	0	0
YNL128W	-1	1
YLR312C	-1	1
YKL191W	1	-1
YCRX03C	0	0
YHR120W	-1	-1
YAR050W	0	1
YOL137W	1	0
YDR530C	-1	1
YER111C	0	0
YER144C	0	0
YOL039W	1	-1
YIL083C	0	0
YHL011C	1	0
YGR184C	0	0
YMR303C	1	1
YPL060W	-1	0
YDR411C	0	0
YBR205W	-1	0
YOR321W	0	0
YMR186W	0	-1
YJL225C	-1	0
YMR278W	0	0
YLR136C	0	1
YGL260W	0	0
YMR207C	1	1
YML015C	-1	0
YOR197W	0	0
YKR089C	-1	0
YDL041W	1	0
YKR072C	0	0
YDL014W	1	-1
YML040W	1	0
YDR260C	0	0
YER079W	-1	1
YER024W	0	1
YOR230W	0	0
YGR234W	0	0
YMR178W	0	-1
YPR037C	0	0
YEL068C	0	0
YNL090W	1	0
YOR307C	0	0
YMR225C	-1	0
YBR095C	0	0
YDR524C	0	0
YGR043C	-1	1
YBL110C	0	0
YPL223C	-1	1
YPL272C	0	0
YOL002C	1	0
YFL005W	0	0
YCR010C	-1	1
YCL046W	0	-1
YMR152W	0	0
YDR154C	1	0
YMR125W	0	-1
YJR031C	1	0
YCL026C-A	0	0
YGL180W	0	1
YNL225C	0	1
YJL055W	0	0
YPR102C	0	-1
YNL334C	0	1
YNL188W	0	-1
YPL064C	0	0
YPL086C	-1	-1
YPR153W	0	0
YKR066C	0	0
YLL003W	0	0
YLR425W	0	0
YDR109C	0	0
YDR221W	0	0
YLR109W	1	0
YKR009C	-1	1
YMR078C	0	0
YLR094C	0	1
YDL154W	0	0
YLR041W	1	0
YJR060W	0	0
YNL161W	1	0
YIL146C	0	1
YLR195C	-1	0
YJL202C	0	0
YOL161C	0	0
YLR231C	0	0
YKL016C	-1	1
YPL111W	0	0
YKL174C	1	0
YKL121W	0	0
YLR380W	0	-1
YMR012W	-1	0
YER093C	0	0
YDL201W	0	0
YDR468C	0	0
YFR003C	0	0
YLR337W	0	0
YOR368W	0	0
YGR128C	1	0
YIL048W	0	0
YLR441C	1	-1
YOL056W	0	0
YFR052W	0	0
YOR026W	0	0
YGL073W	0	0
YGL259W	0	0
YGR106C	1	0
YIL168W	0	0
YGL086W	0	0
YAL044C	-1	0
YPR081C	-1	1
YBR124W	0	0
YDR284C	0	-1
YJL097W	0	0
YOR121C	-1	-1
YBR193C	0	0
YHR143W	0	0
YCL004W	0	0
YDR329C	0	0
YBL044W	0	0
YDR430C	1	0
YGL102C	1	-1
YDR487C	0	0
YPR185W	0	0
YLR406C	-1	-1
YLR077W	0	0
YBR056W	0	1
YNL219C	1	0
YHR034C	0	0
YBL019W	0	0
YOL070C	0	0
YDL062W	0	-1
YGR150C	0	0
YPL200W	0	1
YNR054C	1	0
YDR130C	0	0
YIL015W	1	-1
YEL030W	0	0
YBR291C	0	0
YML114C	1	0
YHR201C	0	-1
YNL299W	0	0
YGR008C	-1	1
YNL311C	0	0
YPR170C	1	-1
YJL030W	0	0
YDR165W	1	0
YGR248W	-1	1
YBR074W	0	0
YOR150W	-1	0
YDR055W	0	0
YML036W	1	0
YDL088C	0	0
YLR113W	0	-1
YLR142W	-1	1
YLL058W	0	0
YDL197C	0	0
YER130C	0	0
YER165W	0	-1
YMR106C	0	0
YCL059C	0	-1
YGL112C	0	0
YMR244W	0	0
YDL008W	0	0
YBL050W	0	0
YGR102C	0	0
YJR014W	0	0
YHR050W	0	1
YPL018W	0	0
YPL185W	-1	1
YJR041C	1	0
YDL248W	0	0
YKR028W	0	0
YKL037W	-1	0
YMR286W	-1	0
YDL175C	0	0
YKL168C	0	1
YFL026W	1	-1
YDL102W	0	1
YGL029W	0	0
YDL128W	0	1
YPL098C	0	0
YMR033W	1	0
YPR003C	0	0
YGR262C	0	0
YDR202C	-1	1
YGR215W	0	1
YNL013C	0	1
YDR253C	0	0
YCR082W	0	0
YJL223C	0	0
YOR001W	0	0
YKL088W	0	0
YLR276C	1	-1
YCRX01W	0	0
YDL222C	-1	1
YNL140C	0	0
YOL095C	0	0
YNR022C	0	0
YDR409W	0	0
YBR221C	0	0
YAL005C	0	0
YPL158C	0	0
YBR174C	0	0
YJL121C	-1	0
YKL008C	1	-1
YBR103W	0	0
YNR004W	0	0
YPL032C	1	-1
YHR064C	1	-1
YKL197C	0	0
YGR202C	1	0
YDR377W	-1	1
YIR007W	0	0
YPL045W	0	0
YLR314C	0	0
YFR020W	0	0
YNL126W	0	0
YOR327C	0	1
YOL139C	1	-1
YBR207W	0	1
YNL269W	0	0
YDR532C	0	1
YKL210W	0	0
YER146W	-1	0
YHR159W	0	0
YPL132W	0	1
YIL114C	1	0
YJL089W	0	1
YMR301C	0	0
YBL029W	-1	1
YMR188C	-1	0
YGR154C	0	0
YOR389W	0	0
YLR130C	1	0
YER022W	0	1
YBR140C	1	0
YKR070W	1	0
YDL016C	0	0
YMR205C	0	-1
YNL203C	-1	1
YJL185C	0	1
YML017W	1	0
YKR087C	0	0
YOR232W	0	0
YGR281W	0	0
YGR236C	0	1
YKR091W	-1	1
YHL013C	1	0
YOR059C	-1	0
YOR309C	-1	-1
YBR097W	-1	0
YMR227C	0	0
YDR030C	0	0
YPL221W	0	0
YPL274W	0	0
YEL051W	0	0
YOL004W	0	-1
YGR014W	0	-1
YGL050W	0	0
YER179W	0	0
YMR150C	0	0
YML056C	1	-1
YFL007W	0	0
YGL182C	0	0
YCR012W	1	-1
YPL084W	0	0
YDR354W	0	0
YPL066W	-1	-1
YJL053W	0	0
YPR104C	0	-1
YBR286W-300	0	-1
YBR286W-650	0	-1
YPR151C	0	1
YOR133W	0	-1
YML028W	0	0
YLL001W	-1	1
YCL067C	0	1
YCL001W	1	0
YGL109W	-1	0
YDR223W	0	0
[truncated: 4,262 more rows]
