# Supplementary material for: Inferring Metabolic States in Uncharacterized Environments Using Gene-Expression Measurements
Source: PLoS Comput Biol. 2013 Mar 21;9(3):e1002988. doi: 10.1371/journal.pcbi.1002988 (PMC3605102; doi:10.1371/journal.pcbi.1002988)
Supplement: Table S3 — Reaction-expression calls. Reactions were classified by expression based on gene-expression calls (Supplementary Table S1) and the metabolic model's detailed Boolean gene-to-reaction mapping (Supplementary Table S2). This list of reaction includes only reactions that have one or more genes associated with them. Highly expressed reactions (rH) are indicated with a ‘1’, lowly expressed reactions with a ‘−1’ and all others with a ‘0’. (XLSX) [file pcbi.1002988.s006.xlsx]

## Sheet: tableS3_reactionExpressionCalls
rxnId	YPD	YPEtOH
R_13BGH	0	0
R_13BGHe	0	1
R_13GS	0	0
R_2HMHMBQMTm	-1	-1
R_2HP6MPMOm	-1	-1
R_2HPMBQMTm	-1	-1
R_2HPMMBQMOm	-1	-1
R_3DH5HPBMTm	-1	-1
R_3HAO	0	1
R_3MOBDC	1	1
R_3MOPDC	1	1
R_4HGLSDm	0	0
R_4MOPDC	0	1
R_5AOPt2	1	0
R_AASAD1	0	0
R_AASAD2	0	0
R_ABTA	0	1
R_ABUTt2r	1	1
R_ACACT1	1	-1
R_ACACT1m	1	-1
R_ACALDCD	1	1
R_ACCOACr	0	0
R_ACGAM6PS	0	0
R_ACGAMPM	1	0
R_ACGKm	0	0
R_ACHBSm	0	0
R_ACHLE1	0	1
R_ACHLE2	0	1
R_ACHLE3	0	1
R_ACLSm	0	0
R_ACOAHim	-1	1
R_ACONT	-1	1
R_ACONT3m	-1	1
R_ACONTm	1	1
R_ACOTAim	-1	0
R_ACP1e	1	-1
R_ACPSm	0	1
R_ACS	0	-1
R_ACSm	0	1
R_ACt2r	0	0
R_ACtr	-1	1
R_ADA	1	-1
R_ADCL	0	0
R_ADCS	0	-1
R_ADD	1	-1
R_ADEt2	1	1
R_ADHAPR_SC	0	0
R_ADK1	0	0
R_ADK1m	0	0
R_ADK3	0	0
R_ADK3m	0	0
R_ADK4	0	0
R_ADMDC	0	0
R_ADNCYC	0	0
R_ADNK1	0	-1
R_ADNUC	0	-1
R_ADNt2	0	0
R_ADPT	0	1
R_ADSK	0	0
R_ADSL1r	1	0
R_ADSL2r	1	0
R_ADSS	0	-1
R_AGAT_SC	0	0
R_AGPRim	0	0
R_AGTi	-1	1
R_AHCi	0	-1
R_AHSERL2	0	-1
R_AICART	1	0
R_AIRCr	1	0
R_AKGDam	-1	1
R_AKGDbm	-1	1
R_AKP1	0	-1
R_ALASm	0	0
R_ALATA_L	0	0
R_ALATA_Lm	0	0
R_ALAt2r	0	1
R_ALCD22xi	1	1
R_ALCD22xim	0	0
R_ALCD22yi	1	0
R_ALCD23xi	1	1
R_ALCD23xim	0	0
R_ALCD23yi	0	0
R_ALCD24xi	1	1
R_ALCD24xim	0	0
R_ALCD24yi	0	0
R_ALCD25xi	1	1
R_ALCD25xim	0	0
R_ALCD25yi	0	0
R_ALCD26xi	1	1
R_ALCD26xim	0	0
R_ALCD2if	1	1
R_ALCD2ir	1	0
R_ALCD2irm	0	0
R_ALCD2x	0	0
R_ALDD22x	0	1
R_ALDD2xm	-1	1
R_ALDD2y	1	0
R_ALDD2ym	0	1
R_ALLTAHr	0	1
R_ALLTNr	0	1
R_ALLTNti	0	0
R_ALLTTti	0	1
R_ALPHNH	0	0
R_AMETt2	0	0
R_AMETtm	-1	0
R_AMPDA	0	0
R_AMPN	0	0
R_ANPRT	0	0
R_ANS	0	-1
R_AP4AHr	0	0
R_ARABR	-1	0
R_ARGN	0	0
R_ARGSL	0	0
R_ARGSSr	1	0
R_ARGt2r	0	1
R_ASADi	1	0
R_ASNN	0	-1
R_ASNNe	0	1
R_ASNS1	1	0
R_ASNt2r	0	1
R_ASNt6	0	-1
R_ASNt7	1	0
R_ASPCT	0	0
R_ASPGLU2m	0	0
R_ASPKi	0	-1
R_ASPTA	0	0
R_ASPTAm	1	0
R_ASPt2r	0	1
R_ATPATF1	-1	1
R_ATPH1	1	0
R_ATPPRT	1	-1
R_ATPS	1	0
R_ATPS3m	-1	0
R_ATPtm_H	1	1
R_BPNT	1	-1
R_BTDD_RR	-1	0
R_C14STR	1	0
R_C22STDS	0	0
R_C22STDSx	0	-1
R_C24STRer	1	0
R_C3STDH1	1	0
R_C3STDH2	1	0
R_C3STKR1	1	0
R_C3STKR2	1	0
R_C4STMO1	0	0
R_C4STMO2	0	0
R_C5STDS	1	1
R_C8STI	1	-1
R_CAT	-1	1
R_CBPS	0	0
R_CERASE124er	0	1
R_CERASE126er	0	1
R_CERASE224er	0	1
R_CERASE226er	0	1
R_CERS124er	1	1
R_CERS126er	1	1
R_CERS224er	1	0
R_CERS226er	1	0
R_CHLPCTD	1	0
R_CHLt2	0	-1
R_CHOLK	1	0
R_CHORM	0	-1
R_CHORS	0	-1
R_CHTNS	0	0
R_CITtam	0	0
R_CITtbm	0	0
R_CITtcm	0	0
R_COAtim	-1	1
R_CPPPGO	1	0
R_CRNCARtm	-1	1
R_CSNATm	-1	1
R_CSNATr	0	1
R_CSND	0	0
R_CSNt2	1	1
R_CSm	0	1
R_CTPS1	1	0
R_CTPS2	1	0
R_CTPtm	0	0
R_CYOOm	-1	0
R_CYOR_u6m	-1	0
R_CYSS	0	0
R_CYSTGL	1	-1
R_CYSTL	1	0
R_CYSTS	1	0
R_CYSt2r	1	1
R_CYTD	0	0
R_CYTDK2	0	0
R_CYTDt2	0	0
R_DADA	1	-1
R_DAGCPT_SC	1	0
R_DAGPYP_SC	0	0
R_DASYN_SC	0	0
R_DASYNm_SC	0	0
R_DB4PS	0	0
R_DCMPDA	1	0
R_DCTPD	1	0
R_DCYTD	0	0
R_DDPA	1	0
R_DDPAm	0	0
R_DESAT16	-1	1
R_DESAT18	-1	1
R_DGK1	0	0
R_DHAD1m	0	-1
R_DHAD2m	0	-1
R_DHAK	0	0
R_DHFRi	1	0
R_DHNPAm	1	0
R_DHORD4i	0	-1
R_DHORDfum	0	-1
R_DHORDi	0	-1
R_DHORTS	0	0
R_DHPSm	1	0
R_DHQS	0	0
R_DHQTi	0	0
R_DKMPPD2	0	0
R_DMATT	0	0
R_DNMPPA	0	0
R_DOLPMMer	1	0
R_DOLPMTcer	0	0
R_DPMVD	1	-1
R_DPR	0	-1
R_DPRm	1	-1
R_DROPPRy	0	0
R_DRTPPD	0	0
R_DTMPK	0	0
R_DURIPP	0	0
R_DUTPDP	1	0
R_D_LACDcm	0	0
R_D_LACDm	0	0
R_D_LACt2	-1	1
R_ENO	1	0
R_EPGALURSe	0	0
R_EPISTESTH_SCe	0	0
R_EPISTt	0	0
R_ERGSTESTH_SCe	0	0
R_ERGSTt	0	0
R_ETHAK	0	0
R_ETHAPT_SC	1	-1
R_FACOAL140	0	0
R_FACOAL160	0	0
R_FACOAL161	0	0
R_FACOAL180	0	0
R_FACOAL181	0	0
R_FACOAL182	0	0
R_FAS100	0	-1
R_FAS100COA	0	-1
R_FAS120	0	-1
R_FAS120COA	0	-1
R_FAS140	0	-1
R_FAS140COA	0	-1
R_FAS160	0	-1
R_FAS160COA	0	-1
R_FAS161	1	-1
R_FAS180	0	-1
R_FAS180COA	0	-1
R_FAS181	1	-1
R_FAS80COA_L	0	-1
R_FAS80_L	0	-1
R_FBA	1	-1
R_FBA3	1	-1
R_FBP	-1	1
R_FBP26	0	0
R_FCLTm	0	-1
R_FDH	0	1
R_FE2t	1	-1
R_FECOSTESTH_SCe	0	0
R_FECOSTt	0	0
R_FKYNH	0	0
R_FMNAT	0	0
R_FOLD3m	1	0
R_FRDcm	1	-1
R_FRDm	0	0
R_FRTT	1	0
R_FRUt2	1	1
R_FTHFLi	0	-1
R_FUM	-1	1
R_FUMm	-1	1
R_G3PCt	-1	0
R_G3PD1ir	0	0
R_G3PD1irm	1	-1
R_G3PDm	-1	1
R_G3PT	1	1
R_G5SD	0	-1
R_G5SD2	0	-1
R_G6PDH2	0	0
R_G6PI	0	-1
R_G6PI3	0	-1
R_GALK	-1	-1
R_GALS3	0	0
R_GALT	-1	-1
R_GALU	0	0
R_GALt2	0	1
R_GAPD	1	0
R_GARFTi	0	0
R_GAT1_SC	0	1
R_GAT2_SC	0	1
R_GBEZ	-1	1
R_GCC2am	-1	0
R_GCC2bim	-1	0
R_GCC2cm	-1	0
R_GCCam	-1	0
R_GCCbim	-1	0
R_GCCcm	-1	0
R_GF6PTA	1	0
R_GHMT2r	1	-1
R_GHMT2rm	0	0
R_GK1	0	0
R_GK2	0	0
R_GLCGSD	-1	0
R_GLCGSDv	-1	1
R_GLCP	-1	0
R_GLCS2	-1	1
R_GLCt1	1	1
R_GLNS	0	-1
R_GLNt2r	0	1
R_GLNt6	0	-1
R_GLNt7	1	0
R_GLU5K	0	0
R_GLUCYS	0	0
R_GLUDC	-1	1
R_GLUDxi	-1	1
R_GLUDyi	0	1
R_GLUK	-1	1
R_GLUPRT	0	-1
R_GLUSx	0	0
R_GLUt2r	0	1
R_GLUt7m	0	0
R_GLYCDy	-1	-1
R_GLYCLm	-1	0
R_GLYCt	0	0
R_GLYCt2	0	1
R_GLYGS	-1	1
R_GLYK	-1	1
R_GLYOX	0	1
R_GLYt2r	0	1
R_GMPS2	0	-1
R_GND	0	1
R_GNNUC	0	-1
R_GPDDA1	0	0
R_GRTT	0	0
R_GTHO	0	0
R_GTHP	0	1
R_GTHRDt2	1	-1
R_GTHS	1	0
R_GTPCI	0	0
R_GTPCII	0	0
R_GTPH1	1	0
R_GTPt2m	0	0
R_GUAD	0	0
R_GUAPRT	0	-1
R_GUAt2r	1	1
R_H2Ot	0	1
R_HACNHm	1	0
R_HBZOPT6m	0	0
R_HCYSMT	0	0
R_HETZK	0	1
R_HEX1	0	1
R_HEX4	0	0
R_HEX7	0	0
R_HICITDm	1	1
R_HISTD	1	-1
R_HISTP	0	0
R_HISt2r	1	1
R_HKYNH	0	0
R_HMBS	0	0
R_HMGCOAR	0	0
R_HMGCOAS	0	-1
R_HMGCOASm	0	-1
R_HMPK1	0	0
R_HPPKm	1	0
R_HSDxi	1	-1
R_HSDyi	1	-1
R_HSERTA	-1	0
R_HSK	1	-1
R_HSTPT	1	0
R_HXPRT	0	-1
R_ICDHxm	-1	1
R_ICDHy	-1	1
R_ICDHym	-1	0
R_ICL	-1	1
R_IG3PS	0	0
R_IGPDH	0	-1
R_IGPS	0	-1
R_ILETA	0	0
R_ILETAm	1	-1
R_ILEt2r	1	1
R_ILEt6	0	-1
R_ILEt7	1	0
R_IMPC	1	0
R_IMPD	1	-1
R_INDPYRD	1	1
R_INSTt2	0	0
R_IPC124PLC_SC	0	0
R_IPC126PLC_SC	0	0
R_IPC224PLC_SC	0	0
R_IPC226PLC_SC	0	0
R_IPC324PLC_SC	0	0
R_IPC326PLC_SC	0	0
R_IPCS124_SC	1	0
R_IPCS126_SC	1	0
R_IPCS224_SC	1	0
R_IPCS226_SC	1	0
R_IPCS324_SC	1	0
R_IPCS326_SC	1	0
R_IPDDI	0	1
R_IPMD	0	0
R_IPPMIa	0	0
R_IPPMIb	0	0
R_IPPS	1	0
R_IPPSm	0	0
R_KARA1im	1	-1
R_KARA2im	1	-1
R_KYN	0	0
R_KYN3OX	0	0
R_LALDO3	1	0
R_LANOSTESTH_SCe	0	0
R_LANOSTt	0	0
R_LEUTA	0	0
R_LEUt2r	1	1
R_LEUt6	0	-1
R_LEUt7	1	0
R_LGTHL	-1	0
R_LNS14DM	0	-1
R_LNS14DMx	0	-1
R_LNSTLS	0	-1
R_LPCAT_SC	0	0
R_LPP_SC	0	0
R_LYSt2r	0	1
R_L_LACD2cm	-1	1
R_L_LACt2r	-1	1
R_MALS	0	1
R_MALT	0	1
R_MALTt2	0	1
R_MALtm	0	0
R_MAN1PT	0	-1
R_MAN6PI	1	0
R_MANt2	1	1
R_MCITL2m	-1	1
R_MCITSm	0	1
R_MDH	0	1
R_MDHm	-1	1
R_ME1m	0	0
R_ME2m	0	0
R_METAT	1	-1
R_METB1	0	1
R_METS	1	0
R_METt2r	1	1
R_MEVK1	1	-1
R_MEVK2	1	-1
R_MEVK3	1	-1
R_MEVK4	1	-1
R_MFAPS_SC	-1	1
R_MI1PP	1	0
R_MI1PS	-1	1
R_MOHMT	0	0
R_MTAP	1	-1
R_MTHFC	0	-1
R_MTHFD	0	-1
R_MTHFD2i	1	0
R_MTHFR3	0	0
R_NACt	0	0
R_NADH2_u6cm	0	0
R_NADH2_u6m	1	1
R_NADK	0	0
R_NADKm	0	0
R_NADS1	0	0
R_NAPRT	0	-1
R_NDP1	1	0
R_NDP3	1	0
R_NDP7	1	0
R_NDPK1	0	1
R_NDPK2	0	1
R_NDPK3	0	1
R_NDPK4	0	1
R_NDPK5	0	1
R_NDPK6	0	1
R_NDPK7	0	1
R_NDPK8	0	1
R_NDPK9	0	1
R_NFORTYRt	0	0
R_NFTYROX	0	0
R_NH4t	0	1
R_NH4ti	1	-1
R_NMNAT	0	1
R_NNAT	0	1
R_NNDPR	0	1
R_NTD11	0	0
R_NTD2	0	-1
R_NTD4	0	-1
R_OAAt2m	0	0
R_OCBTi	0	1
R_OHACT1	1	0
R_OHACT2	1	0
R_OHACT3	1	0
R_OHACT4	1	0
R_OHACT5	1	0
R_OMCDC	0	0
R_OMPDC	1	0
R_ORNDC	1	0
R_ORNTA	0	0
R_ORNTACim	0	0
R_ORNt2r	0	1
R_ORNt3m	0	0
R_ORPT	0	1
R_P5CR	1	-1
R_PANTS	1	-1
R_PAPSR	0	0
R_PC	0	1
R_PCDAGAT	0	0
R_PDE1	1	1
R_PDHcm	-1	1
R_PDHm	-1	0
R_PETHCT	0	0
R_PETOHM_SC	1	0
R_PFK	0	-1
R_PFK26	1	0
R_PFK_3	0	-1
R_PGCD	1	0
R_PGI	0	-1
R_PGK	1	-1
R_PGL	1	1
R_PGM	1	1
R_PGMT	0	0
R_PHCDm	0	0
R_PHETA1	0	1
R_PHEt2r	1	1
R_PI35BP5P_SC	0	0
R_PI3P5K_SC	0	0
R_PI45BP5P_SC	0	0
R_PI4P5K_SC	0	0
R_PINOS_SC	1	-1
R_PIt2m	-1	1
R_PIt2r	1	0
R_PIt5m	-1	1
R_PLBP1I_SCe	1	1
R_PLBPC_SC	0	0
R_PLBPC_SCe	0	1
R_PLD_SC	0	1
R_PMANM	1	-1
R_PMETM_SC	-1	1
R_PMEVK	0	-1
R_PMI12346PH	0	-1
R_PMI12346PS	0	0
R_PMI1346PH	0	-1
R_PMI1346PS	0	0
R_PMPK	0	0
R_PNTK	0	0
R_PNTOt2	0	0
R_POLYAO	0	0
R_POLYAO2	0	0
R_POLYAO3	0	0
R_PPA	0	-1
R_PPAm	0	0
R_PPBNGS	0	0
R_PPCK	-1	1
R_PPM	0	0
R_PPND2	0	0
R_PPNDH	0	0
R_PPPGOm	0	1
R_PPTTm	1	-1
R_PPYRDC	1	1
R_PRAGSr	0	-1
R_PRAIS	0	-1
R_PRAIi	0	0
R_PRAMPC	1	-1
R_PRASCS	0	0
R_PRATPP	1	-1
R_PRFGS	0	-1
R_PRMICIi	0	-1
R_PRO1xm	-1	1
R_PROt2r	0	1
R_PRPPS	1	0
R_PSCVTi	0	0
R_PSERDm_SC	1	0
R_PSERDv_SC	0	0
R_PSERS_SC	0	1
R_PSERSm_SC	0	1
R_PSERT	0	-1
R_PSP_L	0	-1
R_PTRCt3i	0	0
R_PTRCtex2	1	0
R_PUNP1	0	0
R_PUNP2	0	0
R_PUNP3	0	0
R_PUNP4	0	0
R_PUNP5	0	0
R_PUNP6	0	0
R_PUNP7	0	0
R_PYK	0	0
R_PYR5CDm	0	0
R_PYRDC	1	1
R_PYRDC2	1	1
R_PYRt2	-1	1
R_RBFK	0	0
R_RBFSa	1	-1
R_RBFSb	0	0
R_RBK	0	0
R_RNDR1	0	0
R_RNDR2	0	0
R_RNDR3	0	0
R_RNDR4	0	0
R_RNTR1	1	1
R_RNTR2	1	1
R_RNTR3	1	1
R_RNTR4	1	1
R_RPE	-1	0
R_RPI	0	0
R_SACCD1	1	1
R_SACCD2	0	0
R_SADT	0	0
R_SAM24MT	1	-1
R_SBTD_D2	0	0
R_SBTD_L	0	0
R_SBTR	-1	0
R_SERD_L	1	0
R_SERt2r	0	1
R_SHK3D	0	0
R_SHKK	0	0
R_SHSL4r	0	0
R_SLFAT	1	-1
R_SO3ti	0	1
R_SO4ti	0	0
R_SPMDt3i	0	0
R_SPMDtex2	1	0
R_SPMS	0	0
R_SPRMS	1	0
R_SPRMt2i	0	0
R_SQLEr	1	0
R_SQLS	0	0
R_SSALy	-1	1
R_SUCCtm	0	0
R_SUCD1m	-1	1
R_SUCD2_u6m	-1	1
R_SUCD3_u6m	-1	1
R_SUCFUMtm	0	1
R_SUCOASm	-1	1
R_SUCRe	-1	-1
R_SULR	0	0
R_TAGL_SC	1	0
R_TALA	0	1
R_THFATm	-1	0
R_THIORDXi	0	1
R_THMDPe	1	-1
R_THMPe	1	-1
R_THMt2	0	1
R_THRAi	0	0
R_THRD_L	1	0
R_THRD_Lm	0	-1
R_THRS	0	-1
R_THRt2r	0	1
R_TKT1	1	1
R_TKT2	1	1
R_TMDPK	0	0
R_TMDPP	0	0
R_TMDPPK	0	0
R_TMDS	0	0
R_TMPPP	0	1
R_TPI	1	0
R_TRDR	0	0
R_TRE6PP	-1	0
R_TRE6PS	-1	0
R_TREH	-1	0
R_TREHv	-1	1
R_TRIGS_SC	1	0
R_TRPO2	-1	1
R_TRPS1	0	-1
R_TRPTA	0	1
R_TRPt2r	1	1
R_TYRNFT	-1	1
R_TYRTAi	0	1
R_TYRTAim	1	0
R_TYRt2r	1	1
R_TYRt6	0	0
R_TYRt7	1	0
R_UDPACGLP	0	0
R_UDPG4E	-1	-1
R_UGLT	-1	-1
R_UGLYCHr	0	0
R_UMPK	0	-1
R_UPP3S	0	0
R_UPPDC1	-1	0
R_UPPRT	1	-1
R_URAt2	-1	-1
R_UREA2t2	0	0
R_UREASE	0	0
R_URIDK2r	0	-1
R_URIK1	0	0
R_URIK2	0	0
R_URIt2	0	0
R_UTPH1	1	0
R_VALTA	0	0
R_VALTAim	1	-1
R_VALt2r	1	1
R_XPPT	0	0
R_XYLK	-1	0
R_XYLR	-1	0
R_XYLTD_D	0	1
R_ZYMSTESTH_SCe	0	0
R_ZYMSTt	0	0
