# Supplementary material for: Inferring Metabolic States in Uncharacterized Environments Using Gene-Expression Measurements
Source: PLoS Comput Biol. 2013 Mar 21;9(3):e1002988. doi: 10.1371/journal.pcbi.1002988 (PMC3605102; doi:10.1371/journal.pcbi.1002988)
Supplement: Table S4 — Lists of high- and zero-frequency reactions for YPD and YPEtOH. High- and zero-frequency reactions computed by integrating gene expression from yeast cultures grown on YPD or YPEtOH [33] and a genome-scale model of yeast metabolism [30]. High-frequency reactions (HFR) are those that are always active among the all alternative optimal flux distributions and zero-frequency reactions (ZFR) are those that are always inactive (see main text). (XLSX) [file pcbi.1002988.s007.xlsx]

## Sheet: tableS4_zeroAndHighFreqRxns.csv
YPD_HFR	YPD_ZFR	YPEtOH_HFR	YPEtOH_ZFR
R_13GS	R_3HAO	R_13BGHe	R_ACLSm
R_2DHPtm	R_ABTt	R_13GS	R_ACP1e
R_2HMHMBQMTm	R_ACGKm	R_2HMHMBQMTm	R_ADD
R_2HP6MPMOm	R_ACOAHim	R_2HP6MPMOm	R_AKP1
R_2HPMBQMTm	R_ACONT	R_2HPMBQMTm	R_ANPRT
R_2HPMMBQMOm	R_ACOTAim	R_2HPMMBQMOm	R_ANS
R_2MBACt	R_ADNUC	R_2OXOADPtim	R_ASNN
R_2OXOADPtim	R_AGPRim	R_3DH5HPBMTm	R_ASNt6
R_34HPPt2m	R_AGTi	R_3DH5HPBtm	R_ASNt7
R_3DH5HPBMTm	R_ALCD23yi	R_3HAO	R_ATPPRT
R_3DH5HPBtm	R_AP4AHr	R_3HPH5MBDCm	R_BPNT
R_3HPH5MBDCm	R_ARABR	R_3MOBDC	R_C22STDSx
R_3MOBDC	R_ARAB_Lt	R_3MOPDC	R_C8STI
R_3MOBtm	R_ATPATF1	R_3OPHB5Hm	R_CHLt2
R_3MOPDC	R_DESAT16	R_3OPHB_5tm	R_DB4PS
R_3OPHB5Hm	R_DESAT18	R_4ABZtm	R_DHAD1m
R_3OPHB_5tm	R_DHAPtm	R_4MOPDC	R_DHAK
R_4ABZtm	R_EX_Nbfortyr_e_	R_6PGLter	R_DHORD4i
R_6PGLter	R_EX_abt_e_	R_AATA	R_DHORDfum
R_AATA	R_EX_arab_L_e_	R_ABTA	R_DROPPRy
R_ACACT1	R_EX_melib_e_	R_ACALDCD	R_DRTPPD
R_ACACT1m	R_EX_sucr_e_	R_ACALDtm	R_EX_chol_e_
R_ACALDCD	R_EX_ura_e_	R_ACCOACr	R_EX_fmn_e_
R_ACALDt	R_EX_xyl_D_e_	R_ACGAM6PS	R_EX_gthrd_e_
R_ACCOACr	R_FAS100	R_ACGAMPM	R_EX_melib_e_
R_ACGAM6PS	R_FAS160	R_ACHLE1	R_EX_sucr_e_
R_ACGAMPM	R_FAS160COA	R_ACOAHim	R_EX_thmmp_e_
R_ACHBSm	R_FAS80_L	R_ACONT	R_EX_thmpp_e_
R_ACLSm	R_FBP	R_ACONT3m	R_EX_ura_e_
R_ACP1e	R_FDNG	R_ACONTm	R_FAS140COA
R_ACS	R_FTHFCLm	R_ACPSm	R_FAS160
R_ADA	R_G3PCt	R_ACS	R_FAS160COA
R_ADD	R_G5SADrm	R_ACSm	R_FAS161
R_ADEt2	R_GALS3	R_ADEt2	R_FECOSTt
R_ADMDC	R_GALT	R_ADHAPR_SC	R_FRDcm
R_ADNCYC	R_GBEZ	R_ADK1	R_G3PD1irm
R_ADSL1r	R_GLCGSD	R_ADK4	R_G5SD
R_ADSS	R_GLCGSDv	R_ADNCYC	R_GALS3
R_AGAT_SC	R_GLCNtv	R_ADPT	R_GLNS
R_AHCYStm	R_GLCP	R_ADSK	R_GLNt6
R_AHCi	R_GLUDC	R_AGAT_SC	R_GLNt7
R_AICART	R_GLUDxi	R_AGTi	R_GLYCDy
R_ALCD22xi	R_GLUK	R_AHCYStm	R_GNNUC
R_ALCD22yi	R_GLYGS	R_AHCi	R_GTHRDt2
R_ALCD23xi	R_GLYOX	R_AKGDam	R_GTPCII
R_ALCD24xi	R_HKYNH	R_AKGDbm	R_GUAPRT
R_ALCD25xi	R_ICDHy	R_ALAt2r	R_HISTD
R_ALCD26xi	R_KYN3OX	R_ALCD22xi	R_HISTP
R_ALCD2if	R_LGTHL	R_ALCD23xi	R_HSK
R_ALCD2ir	R_MELIBt2	R_ALCD24xi	R_HSTPT
R_ALDD22x	R_MI1PS	R_ALCD25xi	R_IG3PS
R_ALDD2y	R_NFORTYRt	R_ALCD2if	R_IGPDH
R_AMETtm	R_NFTYROX	R_ALDD2xm	R_IGPS
R_ARGSL	R_NNDPR	R_ALDD2ym	R_ILEt6
R_ARGSSr	R_NTD2	R_ALLTAHr	R_ILEt7
R_ARGt2r	R_NTD4	R_ALLTNr	R_KARA1im
R_ASADi	R_ORNTACim	R_ALLTNti	R_KYN
R_ASNS1	R_ORNt3m	R_ALLTTti	R_LEUt6
R_ASNt6	R_PMI12346PH	R_AMETt2	R_LEUt7
R_ASNt7	R_PMI12346PS	R_AMETtm	R_LNS14DM
R_ASPCT	R_PMI1346PH	R_AP4AHr	R_MELIBt2
R_ASPKi	R_PMI1346PS	R_ARGSL	R_METAT
R_ATPH1	R_PPCK	R_ARGSSr	R_MTHFD
R_ATPPRT	R_PYR5CDm	R_ARGt2r	R_NDP3
R_ATPS	R_PYRt2	R_ASNNe	R_NDPK6
R_ATPtm_H	R_QUILSYN	R_ASPCT	R_NH4ti
R_BPNT	R_SBTR	R_ASPTA	R_NTD2
R_BTDD_RR	R_SUCRe	R_ATPATF1	R_NTD4
R_BTDt_RR	R_THFATm	R_ATPtm_H	R_ORNTA
R_C14STR	R_TRE6PP	R_BTDD_RR	R_PGI
R_C24STRer	R_TRE6PS	R_BTDt_RR	R_PMDPHT
R_C3STDH1	R_TREH	R_C22STDS	R_PMI12346PH
R_C3STDH2	R_TYRNFT	R_C24STRer	R_PMI12346PS
R_C3STKR1	R_URAt2	R_C5STDS	R_PMI1346PH
R_C3STKR2	R_XYLR	R_CAT	R_PMI1346PS
R_C4STMO1	R_XYLt	R_CBPS	R_PRAIi
R_C4STMO2		R_CERASE124er	R_PRAMPC
R_C5STDS		R_CERASE126er	R_PRATPP
R_C8STI		R_CERASE224er	R_PRMICIi
R_CBPS		R_CERASE226er	R_RBFSa
R_CERASE124er		R_CERS124er	R_RBFSb
R_CERASE126er		R_CERS126er	R_RNDR4
R_CERASE224er		R_CERS224er	R_SAM24MT
R_CERASE226er		R_CERS226er	R_SLFAT
R_CERS124er		R_CHLPCTD	R_SPRMS
R_CERS126er		R_CHOLK	R_SUCRe
R_CERS224er		R_CHORM	R_TAGL_SC
R_CERS226er		R_CHORS	R_THMDPe
R_CHLPCTD		R_CHTNS	R_THMPe
R_CHLt2		R_CO2tm	R_THRS
R_CHOLK		R_COAtim	R_THZPSN2_SC
R_CHORM		R_CPPPGO	R_TRPS1
R_CHORS		R_CRNCARtm	R_UPPRT
R_CHTNS		R_CSNATm	R_URAt2
R_CO2tm		R_CSNATr	R_URIDK2r
R_COAtim		R_CSND
R_CPPPGO		R_CSNt2
R_CSND		R_CSm
R_CSNt2		R_CTPtm
R_CTPS1		R_CYOOm
R_CTPS2		R_CYOR_u6m
R_CYSTGL		R_CYSt2r
R_CYSTL		R_CYTK2
R_CYSTS		R_DADK
R_CYSt2r		R_DAGCPT_SC
R_DADA		R_DASYN_SC
R_DADK		R_DASYNm_SC
R_DAGCPT_SC		R_DESAT16
R_DASYN_SC		R_DESAT18
R_DB4PS		R_DHAPtm
R_DCMPDA		R_DHFRi
R_DCTPD		R_DHFS
R_DDPA		R_DHNPAm
R_DGK1		R_DHNPTtm
R_DHAD1m		R_DHORDi
R_DHAD2m		R_DHORTS
R_DHFRi		R_DHPTtm
R_DHFS		R_DHQS
R_DHNPAm		R_DHQTi
R_DHNPTtm		R_DMATT
R_DHORTS		R_DNMPPA
R_DHPTtm		R_DNTPPA
R_DHQS		R_DOLPMMer
R_DHQTi		R_DOLPMTcer
R_DKMPPD2		R_DOLPt2er
R_DMATT		R_DPCOAK
R_DOLPMMer		R_DPMVD
R_DOLPMTcer		R_DTMPK
R_DOLPt2er		R_DTTPt
R_DPCOAK		R_DUTPDP
R_DPMVD		R_D_LACt2
R_DPRm		R_EPISTt
R_DROPPRy		R_ERGSTt
R_DRTPPD		R_ERGSTter
R_DUTPDP		R_ERGTETROLter
R_D_LACt2m		R_ETOHt
R_ENO		R_EX_13BDglcn_e_
R_ERGSTter		R_EX_Nbfortyr_e_
R_ERGTETROLter		R_EX_ade_e_
R_ETHAK		R_EX_ala_L_e_
R_ETHAPT_SC		R_EX_alltn_e_
R_ETHAt		R_EX_alltt_e_
R_EX_2mbac_e_		R_EX_amet_e_
R_EX_acald_e_		R_EX_arg_L_e_
R_EX_ade_e_		R_EX_btd_RR_e_
R_EX_arg_L_e_		R_EX_csn_e_
R_EX_btd_RR_e_		R_EX_cys_L_e_
R_EX_chol_e_		R_EX_dca_e_
R_EX_csn_e_		R_EX_ddca_e_
R_EX_cys_L_e_		R_EX_dttp_e_
R_EX_dca_e_		R_EX_ergst_e_
R_EX_ddca_e_		R_EX_etoh_e_
R_EX_etha_e_		R_EX_fe2_e_
R_EX_fe2_e_		R_EX_fru_e_
R_EX_fmn_e_		R_EX_g3pi_e_
R_EX_fru_e_		R_EX_gal_e_
R_EX_g3pi_e_		R_EX_gcald_e_
R_EX_gam6p_e_		R_EX_gln_L_e_
R_EX_gcald_e_		R_EX_glu_L_e_
R_EX_gln_L_e_		R_EX_gly_e_
R_EX_his_L_e_		R_EX_gua_e_
R_EX_ile_L_e_		R_EX_his_L_e_
R_EX_ind3eth_e_		R_EX_ile_L_e_
R_EX_inost_e_		R_EX_lac_D_e_
R_EX_leu_L_e_		R_EX_lac_L_e_
R_EX_man_e_		R_EX_leu_L_e_
R_EX_met_L_e_		R_EX_lys_L_e_
R_EX_o2_e_		R_EX_malt_e_
R_EX_phe_L_e_		R_EX_man_e_
R_EX_pheac_e_		R_EX_met_L_e_
R_EX_pi_e_		R_EX_nadp_e_
R_EX_pnto_R_e_		R_EX_nmn_e_
R_EX_pro_L_e_		R_EX_o2_e_
R_EX_ptd1ino_SC_e_		R_EX_ocdca_e_
R_EX_ribflv_e_		R_EX_ocdcea_e_
R_EX_so4_e_		R_EX_pap_e_
R_EX_thm_e_		R_EX_pc_SC_e_
R_EX_thmmp_e_		R_EX_phe_L_e_
R_EX_thmpp_e_		R_EX_pnto_R_e_
R_EX_tre_e_		R_EX_pro_L_e_
R_EX_trp_L_e_		R_EX_ptd1ino_SC_e_
R_EX_tyr_L_e_		R_EX_ribflv_e_
R_EX_val_L_e_		R_EX_ser_L_e_
R_EX_zymst_e_		R_EX_so3_e_
R_FACOAL140		R_EX_so4_e_
R_FACOAL160		R_EX_thr_L_e_
R_FACOAL161		R_EX_trp_L_e_
R_FACOAL180		R_EX_ttdca_e_
R_FACOAL181		R_EX_tyr_L_e_
R_FACOAL182		R_EX_urea_e_
R_FAS100COA		R_EX_val_L_e_
R_FAS120		R_FACOAL140
R_FAS120COA		R_FACOAL160
R_FAS140		R_FACOAL180
R_FAS161		R_FAS100COA
R_FAS181		R_FAS120COA
R_FAS80COA_L		R_FAS80COA_L
R_FBA3		R_FCLTm
R_FBP26		R_FDH
R_FCLTm		R_FE2t
R_FE2t		R_FE2utm
R_FE2utm		R_FKYNH
R_FMNAT		R_FMNAT
R_FRDcm		R_FRTT
R_FRTT		R_FRUt2
R_FRUt2		R_FUM
R_G3PD1irm		R_FUMm
R_G3PDm		R_G3PCt
R_G3PT		R_G3PDm
R_G5SADr		R_G3PT
R_G6PDH2er		R_G6PDH2er
R_G6PI		R_G6Pter
R_G6PI3		R_GALK
R_G6Pter		R_GALU
R_GALU		R_GALt2
R_GAM6Pt		R_GAT1_SC
R_GAPD		R_GAT2_SC
R_GCALDt		R_GBEZ
R_GCALDtm		R_GCALDt
R_GF6PTA		R_GCALDtm
R_GGTT		R_GGTT
R_GHMT2r		R_GK1
R_GLCS2		R_GLCGSDv
R_GLCt1		R_GLCNtv
R_GLCtv		R_GLCS2
R_GLNt2r		R_GLCt1
R_GLNt6		R_GLCtv
R_GLNt7		R_GLNt2r
R_GND		R_GLUDC
R_GRTT		R_GLUDxi
R_GTPCI		R_GLUDyi
R_GTPCII		R_GLUK
R_GTPH1		R_GLUt2r
R_H2Ot		R_GLUt5m
R_H2Oter		R_GLYC3Ptm
R_H2Otv		R_GLYCt2
R_HACNHm		R_GLYGS
R_HBZOPT6m		R_GLYK
R_HCITSm		R_GLYOX
R_HCO3E		R_GLYt2r
R_HDCAt		R_GND
R_HEX1		R_GPDDA1
R_HEX4		R_GRTT
R_HEX7		R_GSNK
R_HICITDm		R_GTHO
R_HISTD		R_GTHP
R_HISTP		R_GTPCI
R_HISt2r		R_GUAt2r
R_HMBS		R_H2Ot
R_HMGCOAR		R_H2Otv
R_HMGCOAS		R_HACNHm
R_HMGCOASm		R_HBZOPT6m
R_HMGCOAtm		R_HCITSm
R_HSDxi		R_HDCAt
R_HSDyi		R_HETZK
R_HSK		R_HEX1
R_HSTPT		R_HEX4
R_IG3PS		R_HEX7
R_IGPDH		R_HICITDm
R_ILETAm		R_HISt2r
R_ILEt2r		R_HKYNH
R_ILEt6		R_HMBS
R_ILEt7		R_HMGCOAR
R_ILEtmi		R_HMPK1
R_IMPC		R_ICDHxm
R_IMPD		R_ICDHy
R_IND3ETHt		R_ICL
R_INSTt2		R_ILEt2r
R_IPC124PLC_SC		R_IPDDI
R_IPC126PLC_SC		R_IPDPtm
R_IPC224PLC_SC		R_KYN3OX
R_IPC226PLC_SC		R_LEUt2r
R_IPC324PLC_SC		R_LGTHL
R_IPC326PLC_SC		R_LYSt2r
R_IPCS124_SC		R_L_LACD2cm
R_IPCS126_SC		R_L_LACt2r
R_IPCS224_SC		R_MALT
R_IPCS226_SC		R_MALTt2
R_IPCS324_SC		R_MAN1PT
R_IPCS326_SC		R_MANNANter
R_IPDDI		R_MANt2
R_IPDPtm		R_MCITDm
R_IPPS		R_MCITL2m
R_KARA1im		R_MCITSm
R_KARA2im		R_MDH
R_LALDO3		R_MDHm
R_LCADi		R_METt2r
R_LEUt2r		R_MFAPS_SC
R_LEUt6		R_MGSA
R_LEUt7		R_MI1PP
R_LNSTLS		R_MI1PS
R_MAN1PT		R_NADH2_u6m
R_MAN6PI		R_NADK
R_MANNANter		R_NADPt
R_MANt2		R_NADS1
R_MCITDm		R_NDPK1
R_MDRPD		R_NDPK2
R_METAT		R_NDPK4
R_METS		R_NDPK5
R_METt2r		R_NDPK7
R_MEVK1		R_NDPK8
R_MEVK2		R_NDPK9
R_MEVK3		R_NFORTYRt
R_MEVK4		R_NFTYROX
R_MGSA		R_NMNAT
R_MI1PP		R_NMNTP
R_MOHMT		R_NNAT
R_MTAP		R_NNDPR
R_MTHFD2i		R_O2t
R_MTHFR3		R_O2tm
R_MTRI		R_OBDHm
R_NADH2_u6m		R_OCBTi
R_NDP1		R_OHACT2
R_NDP3		R_OMPDC
R_NDP7		R_ORPT
R_NDPK2		R_OXAGm
R_NH4t		R_PAN4Ptm
R_NH4ti		R_PAPSR
R_O2t		R_PAPt
R_O2ter		R_PAPtm
R_O2tm		R_PAtm_SC
R_OCBTi		R_PC
R_OHACT1		R_PDE1
R_OHACT2		R_PDHcm
R_OHACT3		R_PENDPtm
R_OHACT4		R_PETOHM_SC
R_OHACT5		R_PGL
R_OMPDC		R_PGMT
R_ORNDC		R_PHETA1
R_ORPT		R_PHEt2r
R_OXAGm		R_PINOS_SC
R_P5CR		R_PIt2m
R_PANTS		R_PIt5m
R_PANTtm		R_PLBP1I_SCe
R_PDE1		R_PLBPC_SCe
R_PENDPtm		R_PLD_SC
R_PETHCT		R_PMANM
R_PEtm_SC		R_PMETM_SC
R_PFK26		R_PMEVK
R_PFK_3		R_PMPK
R_PGCD		R_PNTK
R_PGK		R_PNTOt2
R_PGL		R_PPAm
R_PGM		R_PPBNGS
R_PGMT		R_PPCDC
R_PHEACt		R_PPCK
R_PHETA1		R_PPM
R_PHEt2r		R_PPNCL2
R_PINOS_SC		R_PPPG9tm
R_PIt2r		R_PPPGOm
R_PLBP1I_SCe		R_PPTTm
R_PMANM		R_PPYRDC
R_PMDPHT		R_PRO1xm
R_PMEVK		R_PROt2r
R_PNTK		R_PROtm
R_PNTOt2		R_PRPPS
R_PPAm		R_PSCVTi
R_PPBNGS		R_PSERS_SC
R_PPCDC		R_PSERSm_SC
R_PPM		R_PStm_SC
R_PPNCL2		R_PTPATi
R_PPPG9tm		R_PYRDC
R_PPPGOm		R_PYRDC2
R_PPTTm		R_PYRt2
R_PPYRDC		R_QUILSYN
R_PRAMPC		R_RBFK
R_PRATPP		R_RIBFLVt2
R_PRMICIi		R_RNTR1
R_PROt2r		R_RNTR2
R_PRPPS		R_RNTR3
R_PSCVTi		R_RNTR4
R_PSERDm_SC		R_SACCD1
R_PSERT		R_SACCD2
R_PSP_L		R_SADT
R_PTPATi		R_SERt2r
R_PTRCtex2		R_SHK3D
R_PUNP6		R_SHKK
R_PYRDC		R_SO3ti
R_PYRDC2		R_SO4ti
R_PYRt2m		R_SSALy
R_RBFK		R_SUCD1m
R_RBFSa		R_SUCD2_u6m
R_RBFSb		R_SUCFUMtm
R_RNTR1		R_SUCOASm
R_RNTR2		R_TALA
R_RNTR3		R_THIORDXi
R_RNTR4		R_THMP
R_RPI		R_THRt2r
R_SACCD1		R_TKT1
R_SACCD2		R_TKT2
R_SAM24MT		R_TMDPPK
R_SERD_L		R_TMN
R_SHK3D		R_TMPPP
R_SHKK		R_TRDR
R_SO4ti		R_TREHv
R_SPMDtex2		R_TREt2v
R_SPRMS		R_TRPO2
R_SQ23EPXter		R_TRPt2r
R_SQLEr		R_TTDCAtr
R_SQLS		R_TYRNFT
R_SQLter		R_TYRTAi
R_TAGL_SC		R_TYRt2r
R_THMDPe		R_UDPACGLP
R_THMPe		R_UDPG4E
R_THRD_L		R_UGLYCHr
R_THRS		R_UMPK
R_TKT1		R_UPP3S
R_TKT2		R_UPPDC1
R_TMDPPK		R_UREA2t2
R_TMDS		R_VALTA
R_TPI		R_VALt2r
R_TRDR		R_XYLK
R_TREHv		R_XYLTD_D
R_TREt2		R_ZYMSTt
R_TREt2v
R_TRIGS_SC
R_TRPt2r
R_TYRTAim
R_TYRt2m
R_TYRt2r
R_TYRt6
R_TYRt7
R_UDPACGLP
R_UMPK
R_UNK3
R_UPP3S
R_UPPDC1
R_UPPRT
R_UTPH1
R_VALTAim
R_VALt2m
R_VALt2r
R_ZYMSTt
