# Supplementary material for: Inferring Metabolic States in Uncharacterized Environments Using Gene-Expression Measurements
Source: PLoS Comput Biol. 2013 Mar 21;9(3):e1002988. doi: 10.1371/journal.pcbi.1002988 (PMC3605102; doi:10.1371/journal.pcbi.1002988)
Supplement: Table S5 — Metabolic state of yeast cells growing on YPD. Reaction stoichiometries, identifiers, names, associated genes and predicted fluxes are listed. Reactions with absolute fluxes lower than 10E-10 are not shown. (XLSX) [file pcbi.1002988.s008.xlsx]

## Sheet: tableS5_metabolicState_glc_15_8
rxn	id	flux	name	genes
{'M_udpg_c': 1.0} <==> {'M_udp_c': 1.0, 'M_h_c': 1.0, 'M_13BDglcn_c': 1.0}	R_13GS	2269.6	R_1_3_beta_glucan_synthase	( ( ( YCR034W and YGR032W ) and YLR343W ) or ( ( YCR034W and YGR032W ) and YMR215W ) or ( ( YCR034W and YMR306W ) and YMR215W ) or ( ( YCR034W and YLR342W ) and YOL132W ) or ( ( YCR034W and YMR306W ) and YOL132W ) or ( ( YCR034W and YGR032W ) and YOL030W ) or ( ( YCR034W and YLR342W ) and YOL030W ) or ( ( YCR034W and YMR306W ) and YOL030W ) or ( ( YCR034W and YLR342W ) and YLR343W ) or ( ( YCR034…	S_Alternate_Carbon_Metabolism
{'M_2dhp_c': 1.0} <==> {'M_2dhp_m': 1.0}	R_2DHPtm	572.195	R_2_Dehydropantoate_mitochondrial_transport		S_Transport__Mitochondrial
{'M_amet_m': 1.0, 'M_2hpmhmbq_m': 1.0} <==> {'M_ahcys_m': 1.0, 'M_q6_m': 1.0, 'M_h_m': 1.0}	R_2HMHMBQMTm	0.002	R_2_hexaprenyl_3_methyl_5_hydroxy_6_methoxy_1_4_benzoquinone_methyltransferase__mitochondrial	( YOL096C and YDR204W and YML110C and YGR255C and YOR125C and YGL119W and YLR201C )	S_Quinone_Biosynthesis
{'M_2hp6mp_m': 1.0, 'M_o2_m': 1.0} <==> {'M_2hp6mbq_m': 1.0, 'M_h2o_m': 1.0}	R_2HP6MPMOm	0.002	R_2_Hexaprenyl_6_methoxyphenol_monooxygenase__mitochondrial	( YOL096C and YDR204W and YML110C and YGR255C and YOR125C and YGL119W and YLR201C )	S_Quinone_Biosynthesis
{'M_2hp6mbq_m': 1.0, 'M_amet_m': 1.0} <==> {'M_ahcys_m': 1.0, 'M_2hpmmbq_m': 1.0, 'M_h_m': 1.0}	R_2HPMBQMTm	0.002	R_2_hexaprenyl_6_methoxy_1_4_benzoquinone_methyltransferase__mitochondrial	( YOL096C and YDR204W and YML110C and YGR255C and YOR125C and YGL119W and YLR201C )	S_Quinone_Biosynthesis
{'M_2hpmmbq_m': 1.0, 'M_o2_m': 0.5} <==> {'M_2hpmhmbq_m': 1.0}	R_2HPMMBQMOm	0.002	R_2_hexaprenyl_3_methyl_6_methoxy_1_4_benzoquinone_monooxygenase__mitochondrial	( YOL096C and YDR204W and YML110C and YGR255C and YOR125C and YGL119W and YLR201C )	S_Quinone_Biosynthesis
{'M_2mbac_c': 1.0} <==> {'M_2mbac_e': 1.0}	R_2MBACt	0.002	R_2_methylbutyl_transport__extracellular_		S_Transport__Extracellular
{'M_2obut_c': 1.0} <==> {'M_2obut_m': 1.0}	R_2OBUTtm	0.003	R_2obut_transporter__mitochondrial_		S_Transport__Mitochondrial
{'M_2oxoadp_m': 1.0} <==> {'M_2oxoadp_c': 1.0}	R_2OXOADPtim	572.4	R_2_oxoadipate_transport_out_of_mitochondria_via_diffusion		S_Transport__Mitochondrial
{'M_h_c': 1.0, 'M_34hpp_c': 1.0} <==> {'M_34hpp_m': 1.0, 'M_h_m': 1.0}	R_34HPPt2m	571.994	R_3__4_hydroxyphenyl_pyruvate_mitochondrial_transport_via_proton_symport		S_Transport__Mitochondrial
{'M_3c3hmp_c': 1.0} <==> {'M_3c3hmp_e': 1.0}	R_3C3HMPt	0.001	R_2_Isopropylmalate_transport__diffusion		S_Transport__Extracellular
{'M_amet_m': 1.0, 'M_3dh5hpb_m': 1.0} <==> {'M_3hph5mb_m': 1.0, 'M_ahcys_m': 1.0, 'M_h_m': 1.0}	R_3DH5HPBMTm	0.002	R_S_adenosyl_L_methionine3_hexaprenyl_4_5_dihydroxylate_O_methyltransferase__mitochondrial	( YOL096C and YDR204W and YML110C and YGR255C and YOR125C and YGL119W and YLR201C )	S_Quinone_Biosynthesis
{'M_3dh5hpb_c': 1.0} <==> {'M_3dh5hpb_m': 1.0}	R_3DH5HPBtm	0.002	R_3_Hexaprenyl_4_5_dihydroxybenzoate_transport__mitochondrial		S_Transport__Mitochondrial
{'M_3hph5mb_m': 1.0} <==> {'M_2hp6mp_m': 1.0, 'M_co2_m': 1.0}	R_3HPH5MBDCm	0.002	R_3_Hexaprenyl_4_hydroxy_5_methoxybenzoate_decarboxylase__mitochondrial		S_Quinone_Biosynthesis
{'M_3mob_c': 1.0, 'M_h_c': 1.0} <==> {'M_2mppal_c': 1.0, 'M_co2_c': 1.0}	R_3MOBDC	0.001	R_3_Methyl_2_oxobutanoate_decarboxylase	( YLR134W or YLR044C or ( YGR087C and YGR087C ) )	S_Complex_Alcohol_Metabolism
{'M_3mob_c': 1.0} <==> {'M_3mob_m': 1.0}	R_3MOBtm	-572.197	R_3_methyl_2_oxobutanoate_transport__diffusion__mitochondrial		S_Transport__Mitochondrial
{'M_h_c': 1.0, 'M_3mop_c': 1.0} <==> {'M_co2_c': 1.0, 'M_2mbald_c': 1.0}	R_3MOPDC	0.002	R_3_Methyl_2_oxopentanoate_decarboxylase	( YLR044C or YDL080C or YLR134W or YGR087C or YDR380W )	S_Complex_Alcohol_Metabolism
{'M_3mop_c': 1.0} <==> {'M_3mop_m': 1.0}	R_3MOPtm	-0.002	R_3_Methyl_2_oxopentanoate_transport__diffusion__mitochondrial		S_Transport__Mitochondrial
{'M_o2_c': 0.5, 'M_3ophb_5_c': 1.0} <==> {'M_3dh5hpb_c': 1.0}	R_3OPHB5Hm	0.002	R_3_Hexaprenyl_4_5_dihydroxybenzoate_hydroxylase__mitochondrial		S_Quinone_Biosynthesis
{'M_3ophb_5_c': 1.0} <==> {'M_3ophb_5_m': 1.0}	R_3OPHB_5tm	-0.002	R_3_Octaprenyl_4_hydroxybenzoate_mitochondrial_transport		S_Transport__Mitochondrial
{'M_4abz_c': 1.0} <==> {'M_4abz_e': 1.0}	R_4ABZt	-0.002	R_4_Aminobenzoate_mitochondrial_transport_via_diffusion		S_Transport__Extracellular
{'M_4abz_c': 1.0} <==> {'M_4abz_m': 1.0}	R_4ABZtm	0.002	R_4_Aminobenzoate_mitochondrial_transport_via_diffusion		S_Transport__Mitochondrial
{'M_4hbz_c': 1.0} <==> {'M_4hbz_m': 1.0}	R_4HBZtm	0.002	R_4_Hydroxybenzoate_mitochondrial_transport		S_Transport__Mitochondrial
{'M_4mop_c': 1.0, 'M_h_c': 1.0} ---> {'M_co2_c': 1.0, 'M_3mbald_c': 1.0}	R_4MOPDC	0.00099997	R_4_Methyl_2_oxopentanoate_decarboxylase	( YDL080C or YDR380W )	S_Complex_Alcohol_Metabolism
{'M_5aop_e': 1.0, 'M_h_e': 1.0} ---> {'M_h_c': 1.0, 'M_5aop_c': 1.0}	R_5AOPt2	0.016	R_5_Aminolevulinate_transport_in_via_proton_symport	YDL210W	S_Transport__Extracellular
{'M_6pgl_c': 1.0} <==> {'M_6pgl_r': 1.0}	R_6PGLter	-1.401	R_6_phospho_D_glucono_1_5_lactone_endoplasmic_reticular_transport_via_diffusion		S_Transport__Endoplasmic_Reticular
{'M_L2aadp_c': 1.0, 'M_h_c': 1.0, 'M_atp_c': 1.0, 'M_nadh_c': 1.0} ---> {'M_ppi_c': 1.0, 'M_L2aadp6sa_c': 1.0, 'M_nad_c': 1.0, 'M_amp_c': 1.0}	R_AASAD2	572.4	R_L_aminoadipate_semialdehyde_dehydrogenase__NADH_	( YBR115C and YGL154C )	S_Threonine_and_Lysine_Metabolism
{'M_glu_L_c': 1.0, 'M_2oxoadp_c': 1.0} <==> {'M_L2aadp_c': 1.0, 'M_akg_c': 1.0}	R_AATA	572.4	R_2_aminoadipate_transaminase		S_Threonine_and_Lysine_Metabolism
{'M_accoa_c': 2.0} <==> {'M_coa_c': 1.0, 'M_aacoa_c': 1.0}	R_ACACT1	0.017	R_acetyl_CoA_C_acetyltransferase	YPL028W	S_Fatty_Acid__Biosynthesis
{'M_accoa_m': 2.0} <==> {'M_aacoa_m': 1.0, 'M_coa_m': 1.0}	R_ACACT1m	0.001	R_acetyl_CoA_C_acetyltransferase__mitochondrial	YPL028W	S_Fatty_Acid__Biosynthesis
{'M_acald_c': 2.0} <==> {'M_actn_R_c': 1.0}	R_ACALDCD	0.001	R_Acetaldehyde_condensation	( YLR044C or YGR087C or YLR134W )	S_Alternate_Carbon_Metabolism
{'M_acald_e': 1.0} <==> {'M_acald_c': 1.0}	R_ACALDt	8622.56	R_acetaldehyde_reversible_transport		S_Transport__Extracellular
{'M_accoa_c': 1.0, 'M_atp_c': 1.0, 'M_hco3_c': 1.0} <==> {'M_malcoa_c': 1.0, 'M_h_c': 1.0, 'M_adp_c': 1.0, 'M_pi_c': 1.0}	R_ACCOACr	42.5869	R_acetyl_CoA_carboxylase__reversible_reaction	YNR016C	S_Fatty_Acid__Biosynthesis
{'M_accoa_c': 1.0, 'M_gam6p_c': 1.0} <==> {'M_h_c': 1.0, 'M_coa_c': 1.0, 'M_acgam6p_c': 1.0}	R_ACGAM6PS	0.002	R_N_acetylglucosamine_6_phosphate_synthase	YFL017C	S_Glutamate_metabolism
{'M_acgam6p_c': 1.0} <==> {'M_acgam1p_c': 1.0}	R_ACGAMPM	0.002	R_phosphoacetylglucosamine_mutase	YEL058W	S_Glutamate_metabolism
{'M_2obut_m': 1.0, 'M_h_m': 1.0, 'M_pyr_m': 1.0} <==> {'M_2ahbut_m': 1.0, 'M_co2_m': 1.0}	R_ACHBSm	0.003	R_2_aceto_2_hydroxybutanoate_synthase__mitochondrial	( YCL009C and YMR108W )	S_Valine__Leucine__and_Isoleucine_Metabolism
{'M_h2o_c': 1.0, 'M_aces_c': 1.0} ---> {'M_ac_c': 1.0, 'M_etoh_c': 1.0, 'M_h_c': 1.0}	R_ACHLE3	0.001	R_Ethyl_acetate_hydrolyzing_esterase	YOR126C	S_Complex_Alcohol_Metabolism
{'M_h_m': 1.0, 'M_pyr_m': 2.0} <==> {'M_co2_m': 1.0, 'M_alac_S_m': 1.0}	R_ACLSm	0.202	R_acetolactate_synthase__mitochondrial	( YCL009C and YMR108W )	S_Valine__Leucine__and_Isoleucine_Metabolism
{'M_cit_m': 1.0} <==> {'M_icit_m': 1.0}	R_ACONTm	572.4	R_Aconitate_hydratase	( YLR304C or YJL200C )	S_Citric_Acid_Cycle
{'M_fmn_e': 1.0, 'M_h2o_e': 1.0} <==> {'M_ribflv_e': 1.0, 'M_pi_e': 1.0}	R_ACP1e	0.001	R_acid_phosphatase__extracellular__secreted_	( YBR093C or YAR071W )	S_Riboflavin_Metabolism
{'M_ac_c': 1.0, 'M_atp_c': 1.0, 'M_coa_c': 1.0} <==> {'M_accoa_c': 1.0, 'M_ppi_c': 1.0, 'M_amp_c': 1.0}	R_ACS	8622.56	R_acetyl_CoA_synthetase	YLR153C	S_Pyruvate_Metabolism
{'M_h2o_c': 1.0, 'M_h_c': 1.0, 'M_adn_c': 1.0} <==> {'M_ins_c': 1.0, 'M_nh4_c': 1.0}	R_ADA	1.406	R_Adenosine_deaminase	YNL141W	S_Nucleotide_Salvage_Pathway
{'M_h2o_c': 1.0, 'M_ade_c': 1.0, 'M_h_c': 1.0} <==> {'M_hxan_c': 1.0, 'M_nh4_c': 1.0}	R_ADD	8458.79	R_adenine_deaminase	YNL141W	S_Nucleotide_Salvage_Pathway
{'M_h_e': 1.0, 'M_ade_e': 1.0} <==> {'M_ade_c': 1.0, 'M_h_c': 1.0}	R_ADEt2	7886.59	R_adenine_transport_in_via_proton_symport	( YER056C or YER060W or YER060W-A or YGL186C )	S_Transport__Extracellular
{'M_nadph_c': 1.0, 'M_h_c': 1.0, 'M_1agly3p_SC_c': 0.01} ---> {'M_1ag3p_SC_c': 0.01, 'M_nadp_c': 1.0}	R_ADHAPR_SC	49.4	R_acyldihydroxyacetonephosphate_reductase__yeast_specific	YIL124W	S_Phospholipid_Biosynthesis
{'M_amp_m': 1.0, 'M_atp_m': 1.0} <==> {'M_adp_m': 2.0}	R_ADK1m	0.002	R_adenylate_kinase__mitochondrial	YER170W	S_Nucleotide_Salvage_Pathway
{'M_itp_c': 1.0, 'M_amp_c': 1.0} <==> {'M_idp_c': 1.0, 'M_adp_c': 1.0}	R_ADK4	21017.6	R_adentylate_kinase__ITP_	YDR226W	S_Nucleotide_Salvage_Pathway
{'M_h_c': 1.0, 'M_amet_c': 1.0} <==> {'M_co2_c': 1.0, 'M_ametam_c': 1.0}	R_ADMDC	572.195	R_adenosylmethionine_decarboxylase	YOL052C	S_Methionine_Metabolism
{'M_atp_c': 1.0} <==> {'M_ppi_c': 1.0, 'M_camp_c': 1.0}	R_ADNCYC	0.003	R_adenylate_cyclase	YJL005W	S_Purine_and_Pyrimidine_Biosynthesis
{'M_dcamp_c': 1.0} <==> {'M_fum_c': 1.0, 'M_amp_c': 1.0}	R_ADSL1r	479.36	R_adenylsuccinate_lyase	YLR359W	S_Purine_and_Pyrimidine_Biosynthesis
{'M_gtp_c': 1.0, 'M_asp_L_c': 1.0, 'M_imp_c': 1.0} <==> {'M_dcamp_c': 1.0, 'M_pi_c': 1.0, 'M_h_c': 2.0, 'M_gdp_c': 1.0}	R_ADSS	479.36	R_adenylosuccinate_synthase	YNL220W	S_Purine_and_Pyrimidine_Biosynthesis
{'M_ddcacoa_c': 0.059999999999999998, 'M_dcacoa_c': 0.02, 'M_tdcoa_c': 0.10000000000000001, 'M_ocdycacoa_c': 0.089999999999999997, 'M_pmtcoa_c': 0.27000000000000002, 'M_hdcoa_c': 0.17000000000000001, 'M_stcoa_c': 0.050000000000000003, 'M_odecoa_c': 0.23999999999999999, 'M_1ag3p_SC_c': 0.01} <==> {'M_pa_SC_c': 0.01, 'M_coa_c': 1.0}	R_AGAT_SC	49.4	R_1_Acyl_glycerol_3_phosphate_acyltransferase__yeast_specific	YDL052C	S_Phospholipid_Biosynthesis
{'M_ahcys_c': 1.0} <==> {'M_ahcys_m': 1.0}	R_AHCYStm	-0.006	R_S_adenosyl_L_homocysteine_reversible_transport__mitochondrial		S_Transport__Mitochondrial
{'M_h2o_c': 1.0, 'M_ahcys_c': 1.0} <==> {'M_hcys_L_c': 1.0, 'M_adn_c': 1.0}	R_AHCi	1.406	R_adenosylhomocysteinase	YER043C	S_Methionine_Metabolism
{'M_aicar_c': 1.0, 'M_10fthf_c': 1.0} <==> {'M_fprica_c': 1.0, 'M_thf_c': 1.0}	R_AICART	578.144	R_phosphoribosylaminoimidazolecarboxamide_formyltransferase	( YLR028C or YMR120C )	S_Purine_and_Pyrimidine_Biosynthesis
{'M_akg_c': 1.0, 'M_ala_L_c': 1.0} <==> {'M_glu_L_c': 1.0, 'M_pyr_c': 1.0}	R_ALATA_L	-917.6	R_L_alanine_transaminase	YDR111C	S_Alanine_and_Aspartate_Metabolism
{'M_h_c': 1.0, 'M_2mbald_c': 1.0, 'M_nadh_c': 1.0} <==> {'M_nad_c': 1.0, 'M_2mbtoh_c': 1.0}	R_ALCD22xi	0.001	R_aldehyde_dehydrogenase__2_methylbutanol__NAD_	( YBR145W or YMR303C or YDL168W or YGL256W or YOL086C )	S_Complex_Alcohol_Metabolism
{'M_nadph_c': 1.0, 'M_h_c': 1.0, 'M_2mbald_c': 1.0} <==> {'M_2mbtoh_c': 1.0, 'M_nadp_c': 1.0}	R_ALCD22yi	0.001	R_aldehyde_dehydrogenase__2_methylbutanol__NADP_	( YDR368W or YMR318C or YBR036C )	S_Complex_Alcohol_Metabolism
{'M_2mppal_c': 1.0, 'M_h_c': 1.0, 'M_nadh_c': 1.0} <==> {'M_nad_c': 1.0, 'M_ibutoh_c': 1.0}	R_ALCD23xi	0.001	R_aldehyde_dehydrogenase__isobutyl_alcohol__NAD_	( YGL256W or YBR145W or YDL168W or YOL086C or YMR303C )	S_Complex_Alcohol_Metabolism
{'M_h_c': 1.0, 'M_3mbald_c': 1.0, 'M_nadh_c': 1.0} <==> {'M_iamoh_c': 1.0, 'M_nad_c': 1.0}	R_ALCD24xi	0.00099997	R_aldehyde_dehydrogenase__isoamyl_alcohol__NAD_	( YDL168W or YGL256W or YMR303C or YOL086C or YBR145W )	S_Complex_Alcohol_Metabolism
{'M_h_c': 1.0, 'M_nadh_c': 1.0, 'M_pacald_c': 1.0} <==> {'M_nad_c': 1.0, 'M_2phetoh_c': 1.0}	R_ALCD25xi	7998.54	R_aldehyde_dehydrogenase__2_phenylethanol__NAD_	( YGL256W or YMR303C or YDL168W or YOL086C or YBR145W )	S_Complex_Alcohol_Metabolism
{'M_id3acald_c': 1.0, 'M_h_c': 1.0, 'M_nadh_c': 1.0} <==> {'M_nad_c': 1.0, 'M_ind3eth_c': 1.0}	R_ALCD26xi	208714	R_aldehyde_dehydrogenase__tryptophol__NAD_	( YGL256W or YDL168W or YMR303C or YBR145W or YOL086C )	S_Complex_Alcohol_Metabolism
{'M_etoh_c': 1.0, 'M_nad_c': 1.0} <==> {'M_h_c': 1.0, 'M_nadh_c': 1.0, 'M_acald_c': 1.0}	R_ALCD2if	0.001	R_alcohol_dehydrogenase__forward_rxn__ethanol___acetaldehyde_	YMR303C	S_Pyruvate_Metabolism
{'M_h_c': 1.0, 'M_nadh_c': 1.0, 'M_acald_c': 1.0} <==> {'M_etoh_c': 1.0, 'M_nad_c': 1.0}	R_ALCD2ir	0.001	R_alcohol_dehydrogenase__reverse_rxn__acetaldehyde___ethanol_	( YOL086C or YGL256W or YBR145W )	S_Pyruvate_Metabolism
{'M_aproa_c': 1.0, 'M_h2o_c': 1.0, 'M_nad_c': 1.0} <==> {'M_ala_B_c': 1.0, 'M_h_c': 2.0, 'M_nadh_c': 1.0}	R_ALDD22x	572.195	R_aldehyde_dehydrogenase__3_aminopropanal__NAD_	( YMR170C or YMR169C )	S_Pantothenate_and_CoA_Biosynthesis
{'M_h2o_c': 1.0, 'M_nadp_c': 1.0, 'M_acald_c': 1.0} <==> {'M_ac_c': 1.0, 'M_nadph_c': 1.0, 'M_h_c': 2.0}	R_ALDD2y	8622.56	R_aldehyde_dehydrogenase__acetaldehyde__NADP_	YPL061W	S_Pyruvate_Metabolism
{'M_amet_c': 1.0} <==> {'M_amet_m': 1.0}	R_AMETtm	0.006	R_S_Adenosyl_L_methionine_reversible_transport__mitochondrial	YNL003C	S_Transport__Mitochondrial
{'M_h2o_c': 1.0, 'M_arg_L_c': 1.0} ---> {'M_urea_c': 1.0, 'M_orn_c': 1.0}	R_ARGN	15836.8	R_arginase	YPL111W	S_Arginine_and_Proline_Metabolism
{'M_argsuc_c': 1.0} <==> {'M_fum_c': 1.0, 'M_arg_L_c': 1.0}	R_ARGSL	8898.88	R_argininosuccinate_lyase	YHR018C	S_Arginine_and_Proline_Metabolism
{'M_citr_L_c': 1.0, 'M_atp_c': 1.0, 'M_asp_L_c': 1.0} <==> {'M_ppi_c': 1.0, 'M_h_c': 1.0, 'M_argsuc_c': 1.0, 'M_amp_c': 1.0}	R_ARGSSr	8898.88	R_argininosuccinate_synthase__reversible	YOL058W	S_Arginine_and_Proline_Metabolism
{'M_arg_L_e': 1.0, 'M_h_e': 1.0} <==> {'M_arg_L_c': 1.0, 'M_h_c': 1.0}	R_ARGt2r	7259.34	R_L_arganine_reversible_transport_via_proton_symport	( YKR039W or YEL063C or YNL270C )	S_Transport__Extracellular
{'M_nadph_c': 1.0, 'M_h_c': 1.0, 'M_4pasp_c': 1.0} <==> {'M_pi_c': 1.0, 'M_nadp_c': 1.0, 'M_aspsa_c': 1.0}	R_ASADi	382.802	R_aspartate_semialdehyde_dehydrogenase__irreversible	YDR158W	S_Alanine_and_Aspartate_Metabolism
{'M_h2o_c': 1.0, 'M_gln_L_c': 1.0, 'M_atp_c': 1.0, 'M_asp_L_c': 1.0} <==> {'M_asn_L_c': 1.0, 'M_glu_L_c': 1.0, 'M_h_c': 1.0, 'M_ppi_c': 1.0, 'M_amp_c': 1.0}	R_ASNS1	203.4	R_asparagine_synthase__glutamine_hydrolysing_	( YML096W or YGR124W or YPR145W )	S_Alanine_and_Aspartate_Metabolism
{'M_asn_L_c': 1.0, 'M_h_v': 1.0} <==> {'M_h_c': 1.0, 'M_asn_L_v': 1.0}	R_ASNt6	0.001	R_L_asparagine_transport_in_via_proton_antiport__vacuolar_	YJR001W	S_Transport__Vacuolar
{'M_asn_L_v': 1.0, 'M_h_v': 1.0} <==> {'M_asn_L_c': 1.0, 'M_h_c': 1.0}	R_ASNt7	0.001	R_L_asparagine_transport_out_via_proton_symport__vacuolar	( YKL146W or YNL101W )	S_Transport__Vacuolar
{'M_cbp_c': 1.0, 'M_asp_L_c': 1.0} <==> {'M_pi_c': 1.0, 'M_h_c': 1.0, 'M_cbasp_c': 1.0}	R_ASPCT	209.201	R_aspartate_carbamoyltransferase	YJL130C	S_Purine_and_Pyrimidine_Biosynthesis
{'M_atp_c': 1.0, 'M_asp_L_c': 1.0} <==> {'M_4pasp_c': 1.0, 'M_adp_c': 1.0}	R_ASPKi	382.802	R_aspartate_kinase__irreversible	YER052C	S_Alanine_and_Aspartate_Metabolism
{'M_akg_c': 1.0, 'M_asp_L_c': 1.0} <==> {'M_glu_L_c': 1.0, 'M_oaa_c': 1.0}	R_ASPTA	-10768.6	R_aspartate_transaminase	YLR027C	S_Alanine_and_Aspartate_Metabolism
{'M_h2o_c': 2.0, 'M_atp_c': 1.0} <==> {'M_pi_c': 2.0, 'M_h_c': 2.0, 'M_amp_c': 1.0}	R_ATPH1	0.001	R_ATP_diphosphohydrolase	YER005W	S_Nucleotide_Salvage_Pathway
{'M_prpp_c': 1.0, 'M_atp_c': 1.0} <==> {'M_ppi_c': 1.0, 'M_prbatp_c': 1.0}	R_ATPPRT	578.144	R_ATP_phosphoribosyltransferase	YER055C	S_Histidine_Metabolism
{'M_h2o_c': 1.0, 'M_atp_c': 1.0} <==> {'M_pi_c': 1.0, 'M_adp_c': 1.0, 'M_h_e': 1.0}	R_ATPS	0.001	R_ATPase__cytosolic	( ( YCR024C-A and YEL017C-A and YGL008C ) or ( YCR024C-A and YEL017C-A and YPL036W ) )	S_Transport__Extracellular
{'M_adp_m': 1.0, 'M_h_c': 3.0, 'M_pi_m': 1.0} ---> {'M_atp_m': 1.0, 'M_h_m': 2.0, 'M_h2o_m': 1.0}	R_ATPS3m	736.276	R_ATP_synthase__mitochondrial	( ( Q0080 and Q0085 and Q0130 and YBL099W and YBR039W and YDL004W and YDL181W and YDR298C and YDR377W and YJR121W and YKL016C and YLR295C and YML081C-A and YPL078C and YPL271W ) or ( Q0080 and Q0085 and Q0130 and YBL099W and YBR039W and YDL004W and YDL181W and YDR298C and YDR322C-A and YDR377W and YJR121W and YKL016C and YLR295C and YML081C-A and YOL077W-A and YPL078C and YPL271W and YPR020W ) )	S_Oxidative_Phosphorylation
{'M_atp_m': 1.0, 'M_h_c': 1.0, 'M_adp_c': 1.0} <==> {'M_adp_m': 1.0, 'M_atp_c': 1.0, 'M_h_m': 1.0}	R_ATPtm_H	736.272	R_ADPATP_transporter__mitochondrial	( YBR085W or YBL030C or YMR056C )	S_Transport__Mitochondrial
{'M_h2o_c': 1.0, 'M_pap_c': 1.0} <==> {'M_pi_c': 1.0, 'M_amp_c': 1.0}	R_BPNT	771.591	R_3__5__bisphosphate_nucleotidase	YOL064C	S_Cysteine_Metabolism
{'M_nad_c': 1.0, 'M_btd_RR_c': 1.0} <==> {'M_h_c': 1.0, 'M_actn_R_c': 1.0, 'M_nadh_c': 1.0}	R_BTDD_RR	-0.002	R__R_R__butanediol_dehydrogenase	YAL060W	S_Alternate_Carbon_Metabolism
{'M_btd_RR_c': 1.0} <==> {'M_btd_RR_e': 1.0}	R_BTDt_RR	0.002	R__R_R__butanediol_transport		S_Transport__Extracellular
{'M_44mctr_c': 1.0, 'M_h_c': 1.0, 'M_nadph_c': 1.0} <==> {'M_nadp_c': 1.0, 'M_44mzym_c': 1.0}	R_C14STR	0.001	R_C_14_sterol_reductase	YNL280C	S_Sterol_Metabolism
{'M_o2_c': 1.0, 'M_ergtrol_c': 1.0, 'M_h_c': 1.0, 'M_nadh_c': 1.0} ---> {'M_h2o_c': 2.0, 'M_nad_c': 1.0, 'M_ergtetrol_c': 1.0}	R_C22STDSx	1.4	R_C_22_sterol_desaturase__NAD_	( ( YIL043C and YNL111C and YMR015C ) or ( YNL111C and YMR015C and YKL150W ) )	S_Sterol_Metabolism
{'M_h_r': 1.0, 'M_nadph_r': 1.0, 'M_ergtetrol_r': 1.0} <==> {'M_ergst_r': 1.0, 'M_nadp_r': 1.0}	R_C24STRer	1.4	R_C_s24_sterol_reductase__endoplamic_reticular	YGL012W	S_Sterol_Metabolism
{'M_nad_c': 1.0, 'M_4mzym_int1_c': 1.0} <==> {'M_4mzym_int2_c': 1.0, 'M_h_c': 1.0, 'M_nadh_c': 1.0, 'M_co2_c': 1.0}	R_C3STDH1	0.001	R_C_3_sterol_dehydrogenase__4_methylzymosterol_	YGL001C	S_Sterol_Metabolism
{'M_zym_int1_c': 1.0, 'M_nad_c': 1.0} <==> {'M_co2_c': 1.0, 'M_h_c': 1.0, 'M_nadh_c': 1.0, 'M_zym_int2_c': 1.0}	R_C3STDH2	0.001	R_C_3_sterol_dehydrogenase__zymosterol_	YGL001C	S_Sterol_Metabolism
{'M_4mzym_int2_c': 1.0, 'M_nadph_c': 1.0, 'M_h_c': 1.0} <==> {'M_4mzym_c': 1.0, 'M_nadp_c': 1.0}	R_C3STKR1	0.001	R_C_3_sterol_keto_reductase__4_methylzymosterol_	YLR100W	S_Sterol_Metabolism
{'M_nadph_c': 1.0, 'M_h_c': 1.0, 'M_zym_int2_c': 1.0} <==> {'M_zymst_c': 1.0, 'M_nadp_c': 1.0}	R_C3STKR2	0.001	R_C_3_sterol_keto_reductase__zymosterol_	YLR100W	S_Sterol_Metabolism
{'M_o2_c': 3.0, 'M_nadph_c': 3.0, 'M_h_c': 3.0, 'M_44mzym_c': 1.0} <==> {'M_h2o_c': 4.0, 'M_nadp_c': 3.0, 'M_4mzym_int1_c': 1.0}	R_C4STMO1	0.001	R_C_4_sterol_methyl_oxidase__4_4_dimethylzymosterol_	YGR060W	S_Sterol_Metabolism
{'M_4mzym_c': 1.0, 'M_nadph_c': 3.0, 'M_h_c': 3.0, 'M_o2_c': 3.0} <==> {'M_h2o_c': 4.0, 'M_zym_int1_c': 1.0, 'M_nadp_c': 3.0}	R_C4STMO2	0.001	R_C_4_sterol_methyl_oxidase__4_methylzymosterol_	YGR060W	S_Sterol_Metabolism
{'M_o2_c': 1.0, 'M_nadph_c': 1.0, 'M_h_c': 1.0, 'M_epist_c': 1.0} <==> {'M_h2o_c': 2.0, 'M_ergtrol_c': 1.0, 'M_nadp_c': 1.0}	R_C5STDS	1.4	R_C_5_sterol_desaturase	YLR056W	S_Sterol_Metabolism
{'M_fecost_c': 1.0} <==> {'M_epist_c': 1.0}	R_C8STI	1.4	R_C_8_sterol_isomerase	YMR202W	S_Sterol_Metabolism
{'M_h2o_c': 1.0, 'M_gln_L_c': 1.0, 'M_atp_c': 2.0, 'M_hco3_c': 1.0} <==> {'M_cbp_c': 1.0, 'M_glu_L_c': 1.0, 'M_h_c': 2.0, 'M_adp_c': 2.0, 'M_pi_c': 1.0}	R_CBPS	9108.08	R_carbamoyl_phosphate_synthase__glutamine_hydrolysing_	( ( YJR109C and YOR303W ) or YJL130C )	S_Arginine_and_Proline_Metabolism
{'M_cer1_24_r': 1.0, 'M_h_r': 1.0, 'M_coa_r': 1.0} <==> {'M_sphgn_r': 1.0, 'M_ttccoa_r': 1.0}	R_CERASE124er	0.001	R_alkaline_ceramidase__ceramide_1___endoplasmic_reticulum	YPL087W	S_Sphingolipid_Metabolism
{'M_h_r': 1.0, 'M_cer1_26_r': 1.0, 'M_coa_r': 1.0} <==> {'M_hexccoa_r': 1.0, 'M_sphgn_r': 1.0}	R_CERASE126er	0.001	R_alkaline_ceramidase__ceramide_1___endoplasmic_reticulum	YPL087W	S_Sphingolipid_Metabolism
{'M_h_r': 1.0, 'M_cer2_24_r': 1.0, 'M_coa_r': 1.0} <==> {'M_ttccoa_r': 1.0, 'M_psphings_r': 1.0}	R_CERASE224er	0.001	R_alkaline_ceramidase__ceramide_2___endoplasmic_reticulum	( YPL087W or YBR183W )	S_Sphingolipid_Metabolism
{'M_h_r': 1.0, 'M_cer2_26_r': 1.0, 'M_coa_r': 1.0} <==> {'M_hexccoa_r': 1.0, 'M_psphings_r': 1.0}	R_CERASE226er	0.001	R_alkaline_ceramidase__ceramide_2___endoplasmic_reticulum	( YPL087W or YBR183W )	S_Sphingolipid_Metabolism
{'M_sphgn_r': 1.0, 'M_ttccoa_r': 1.0} <==> {'M_cer1_24_r': 1.0, 'M_h_r': 1.0, 'M_coa_r': 1.0}	R_CERS124er	0.001	R_Ceramide_1_synthase__24C___endoplasmic_reticular	( YHL003C or YKL008C or YPL087W )	S_Sphingolipid_Metabolism
{'M_hexccoa_r': 1.0, 'M_sphgn_r': 1.0} <==> {'M_h_r': 1.0, 'M_cer1_26_r': 1.0, 'M_coa_r': 1.0}	R_CERS126er	0.001	R_Ceramide_1_synthase__26C___endoplasmic_reticular	( YHL003C or YKL008C or YPL087W )	S_Sphingolipid_Metabolism
{'M_ttccoa_r': 1.0, 'M_psphings_r': 1.0} <==> {'M_h_r': 1.0, 'M_cer2_24_r': 1.0, 'M_coa_r': 1.0}	R_CERS224er	0.001	R_Ceramide_2_synthase__24C___endoplasmic_reticular	( YHL003C or YKL008C or YBR183W )	S_Sphingolipid_Metabolism
{'M_hexccoa_r': 1.0, 'M_psphings_r': 1.0} <==> {'M_h_r': 1.0, 'M_cer2_26_r': 1.0, 'M_coa_r': 1.0}	R_CERS226er	0.001	R_Ceramide_2_synthase__26C___endoplasmic_reticular	( YHL003C or YKL008C or YBR183W )	S_Sphingolipid_Metabolism
{'M_ctp_c': 1.0, 'M_h_c': 1.0, 'M_cholp_c': 1.0} <==> {'M_ppi_c': 1.0, 'M_cdpchol_c': 1.0}	R_CHLPCTD	22.149	R_choline_phosphate_cytididyltransferase	YGR202C	S_Phospholipid_Biosynthesis
{'M_chol_e': 1.0, 'M_h_e': 1.0} <==> {'M_h_c': 1.0, 'M_chol_c': 1.0}	R_CHLt2	12	R_choline_transport_via_proton_symport	YGL077C	S_Transport__Extracellular
{'M_atp_c': 1.0, 'M_chol_c': 1.0} <==> {'M_h_c': 1.0, 'M_adp_c': 1.0, 'M_cholp_c': 1.0}	R_CHOLK	22.149	R_Choline_kinase	YLR133W	S_Phospholipid_Biosynthesis
{'M_chor_c': 1.0} <==> {'M_pphn_c': 1.0}	R_CHORM	571.994	R_chorismate_mutase	YPR060C	S_Tyrosine__Tryptophan__and_Phenylalanine_Metabolism
{'M_3psme_c': 1.0} <==> {'M_pi_c': 1.0, 'M_chor_c': 1.0}	R_CHORS	571.996	R_chorismate_synthase	YGL148W	S_Tyrosine__Tryptophan__and_Phenylalanine_Metabolism
{'M_chor_c': 1.0} ---> {'M_pyr_c': 1.0, 'M_4hbz_c': 1.0}	R_CHRPL	0.002	R_Chorismate_pyruvate_lyase		S_Quinone_Biosynthesis
{'M_udpacgal_c': 1.0} <==> {'M_udp_c': 1.0, 'M_h_c': 1.0, 'M_chitin_c': 1.0}	R_CHTNS	0.002	R_chitin_synthase	( YNL192W or YBR038W or YBR023C )	S_Glutamate_metabolism
{'M_cit_e': 1.0, 'M_h_e': 1.0} <==> {'M_h_c': 1.0, 'M_cit_c': 1.0}	R_CITt2r	572.4	R_citrate_reversible_transport_via_symport		S_Transport__Extracellular
{'M_cit_c': 1.0, 'M_mal_L_m': 1.0} <==> {'M_mal_L_c': 1.0, 'M_cit_m': 1.0}	R_CITtam	572.4	R_citrate_transport__mitochondrial	YBR291C	S_Transport__Mitochondrial
{'M_co2_c': 1.0} <==> {'M_co2_m': 1.0}	R_CO2tm	-1145.11	R_CO2_transport__diffusion___mitochondrial		S_Transport__Mitochondrial
{'M_coa_c': 1.0} <==> {'M_coa_m': 1.0}	R_COAtim	0.001	R_CoA_transporter__mitochondrial___irreversible	YHR002W	S_Transport__Mitochondrial
{'M_o2_c': 1.0, 'M_h_c': 2.0, 'M_cpppg3_c': 1.0} <==> {'M_h2o_c': 2.0, 'M_co2_c': 2.0, 'M_pppg9_c': 1.0}	R_CPPPGO	0.002	R_coproporphyrinogen_oxidase__O2_required_	YDR044W	S_Porphyrin_and_Chlorophyll_Metabolism
{'M_crn_m': 1.0, 'M_acrn_c': 1.0} ---> {'M_acrn_m': 1.0, 'M_crn_c': 1.0}	R_CRNCARtm	572.403	R_carnithine_acetylcarnithine_carrier__mitochondrial	YOR100C	S_Transport__Mitochondrial
{'M_acrn_m': 1.0, 'M_coa_m': 1.0} <==> {'M_crn_m': 1.0, 'M_accoa_m': 1.0}	R_CSNATm	572.403	R_carnitine_O_aceyltransferase__mitochondrial	YML042W	S_Fatty_Acid_Metabolism
{'M_accoa_c': 1.0, 'M_crn_c': 1.0} <==> {'M_coa_c': 1.0, 'M_acrn_c': 1.0}	R_CSNATr	572.403	R_carnitine_O_acetyltransferase	( YAR035W or YER024W )	S_Fatty_Acid_Metabolism
{'M_h2o_c': 1.0, 'M_csn_c': 1.0, 'M_h_c': 1.0} <==> {'M_ura_c': 1.0, 'M_nh4_c': 1.0}	R_CSND	11.999	R_Cytosine_deaminase	YPR062W	S_Purine_and_Pyrimidine_Biosynthesis
{'M_h_e': 1.0, 'M_csn_e': 1.0} <==> {'M_csn_c': 1.0, 'M_h_c': 1.0}	R_CSNt2	11.999	R_cytosine_transport_in_via_proton_symport	( YER056C or YER060W or YER060W-A or YGL186C )	S_Transport__Extracellular
{'M_utp_c': 1.0, 'M_atp_c': 1.0, 'M_nh4_c': 1.0} <==> {'M_pi_c': 1.0, 'M_ctp_c': 1.0, 'M_h_c': 2.0, 'M_adp_c': 1.0}	R_CTPS1	89.4	R_CTP_synthase__NH3_	( YBL039C or YJR103W )	S_Purine_and_Pyrimidine_Biosynthesis
{'M_h2o_c': 1.0, 'M_utp_c': 1.0, 'M_gln_L_c': 1.0, 'M_atp_c': 1.0} <==> {'M_glu_L_c': 1.0, 'M_pi_c': 1.0, 'M_ctp_c': 1.0, 'M_h_c': 2.0, 'M_adp_c': 1.0}	R_CTPS2	0.001	R_CTP_synthase__glutamine_	( YBL039C or YJR103W )	S_Purine_and_Pyrimidine_Biosynthesis
{'M_focytc_m': 4.0, 'M_h_m': 6.0, 'M_o2_m': 1.0} ---> {'M_ficytc_m': 4.0, 'M_h_c': 6.0, 'M_h2o_m': 2.0}	R_CYOOm	390.8	R_cytochrome_c_oxidase__mitochondrial	( ( ( Q0045 and Q0250 and Q0275 and YDL067C and YGL187C and YGL191W and YHR051W and YLR038C and YLR395C and YMR256C and YNL052W ) and YEL039C ) or ( ( Q0045 and Q0250 and Q0275 and YDL067C and YGL187C and YGL191W and YHR051W and YLR038C and YLR395C and YMR256C and YNL052W ) and YJR048W ) or ( ( Q0045 and Q0250 and Q0275 and YDL067C and YGL187C and YGL191W and YHR051W and YIL111W and YLR038C and Y…	S_Oxidative_Phosphorylation
{'M_ficytc_m': 2.0, 'M_q6h2_m': 1.0, 'M_h_m': 1.5} ---> {'M_h_c': 1.5, 'M_focytc_m': 2.0, 'M_q6_m': 1.0}	R_CYOR_u6m	781.601	R_ubiquinol_6_cytochrome_c_reductase	( ( ( Q0105 and YBL045C and YDR529C and YEL024W and YFR033C and YGR183C and YHR001W-A and YJL166W and YOR065W and YPR191W ) and YEL039C ) or ( ( Q0105 and YBL045C and YDR529C and YEL024W and YFR033C and YGR183C and YHR001W-A and YJL166W and YOR065W and YPR191W ) and YJR048W ) )	S_Oxidative_Phosphorylation
{'M_cyst_L_c': 1.0, 'M_h2o_c': 1.0} <==> {'M_nh4_c': 1.0, 'M_2obut_c': 1.0, 'M_cys_L_c': 1.0}	R_CYSTGL	0.001	R_cystathionine_g_lyase	YAL012W	S_Methionine_Metabolism
{'M_cyst_L_c': 1.0, 'M_h2o_c': 1.0} <==> {'M_pyr_c': 1.0, 'M_hcys_L_c': 1.0, 'M_nh4_c': 1.0}	R_CYSTL	0.001	R_cystathionine_b_lyase	YFR055W	S_Methionine_Metabolism
{'M_ser_L_c': 1.0, 'M_hcys_L_c': 1.0} <==> {'M_cyst_L_c': 1.0, 'M_h2o_c': 1.0}	R_CYSTS	0.002	R_cystathionine_beta_synthase	YGR155W	S_Glycine_and_Serine_Metabolism
{'M_cys_L_e': 1.0, 'M_h_e': 1.0} <==> {'M_h_c': 1.0, 'M_cys_L_c': 1.0}	R_CYSt2r	13.201	R_L_cysteine_reversible_transport_via_proton_symport	( YKR039W or YDR508C or YBR068C or YDR046C or YBR069C or YOL020W )	S_Transport__Extracellular
{'M_h2o_c': 1.0, 'M_h_c': 1.0, 'M_dad_2_c': 1.0} <==> {'M_din_c': 1.0, 'M_nh4_c': 1.0}	R_DADA	11.998	R_Deoxyadenosine_deaminase	YNL141W	S_Nucleotide_Salvage_Pathway
{'M_damp_c': 1.0, 'M_atp_c': 1.0} <==> {'M_adp_c': 1.0, 'M_dadp_c': 1.0}	R_DADK	-7.2	R_deoxyadenylate_kinase		S_Nucleotide_Salvage_Pathway
{'M_dad_2_e': 1.0, 'M_h_e': 1.0} ---> {'M_h_c': 1.0, 'M_dad_2_c': 1.0}	R_DADNt2	11.998	R_deoxyadenosine_transport_in_via_proton_symport		S_Transport__Extracellular
{'M_cdpchol_c': 1.0, 'M_12dgr_SC_c': 0.01} <==> {'M_h_c': 1.0, 'M_cmp_c': 1.0, 'M_pc_SC_c': 0.01}	R_DAGCPT_SC	22.149	R_diacylglycerol_cholinephosphotransferase__yeast_specific	( YNL130C or YHR123W )	S_Phospholipid_Biosynthesis
{'M_ctp_c': 1.0, 'M_h_c': 1.0, 'M_pa_SC_c': 0.01} <==> {'M_ppi_c': 1.0, 'M_cdpdag_SC_c': 0.01}	R_DASYN_SC	58.349	R_CDP_Diacylglycerol_synthetase__yeast_specific	YBR029C	S_Phospholipid_Biosynthesis
{'M_ru5p_D_c': 1.0} <==> {'M_db4p_c': 1.0, 'M_h_c': 1.0, 'M_for_c': 1.0}	R_DB4PS	3.964	R_3_4_Dihydroxy_2_butanone_4_phosphate_synthase	YDR487C	S_Riboflavin_Metabolism
{'M_h2o_c': 1.0, 'M_h_c': 1.0, 'M_dcmp_c': 1.0} <==> {'M_dump_c': 1.0, 'M_nh4_c': 1.0}	R_DCMPDA	-4.8	R_dCMP_deaminase	YHR144C	S_Purine_and_Pyrimidine_Biosynthesis
{'M_h2o_c': 1.0, 'M_dctp_c': 1.0, 'M_h_c': 1.0} <==> {'M_dutp_c': 1.0, 'M_nh4_c': 1.0}	R_DCTPD	0.001	R_dCTP_deaminase	YHR144C	S_Nucleotide_Salvage_Pathway
{'M_e4p_c': 1.0, 'M_h2o_c': 1.0, 'M_pep_c': 1.0} <==> {'M_pi_c': 1.0, 'M_2dda7p_c': 1.0}	R_DDPA	571.996	R_3_deoxy_D_arabino_heptulosonate_7_phosphate_synthetase	( YBR249C or YDR035W )	S_Tyrosine__Tryptophan__and_Phenylalanine_Metabolism
{'M_odecoa_c': 1.0, 'M_nadph_c': 1.0, 'M_o2_c': 1.0, 'M_h_c': 1.0} ---> {'M_h2o_c': 2.0, 'M_ocdycacoa_c': 1.0, 'M_nadp_c': 1.0}	R_DESAT18_2	0.000529405	R_Oleoyl_CoA_desaturase__n_C181CoA___n_C182CoA_		S_Fatty_Acid__Biosynthesis
{'M_dgmp_c': 1.0, 'M_atp_c': 1.0} <==> {'M_adp_c': 1.0, 'M_dgdp_c': 1.0}	R_DGK1	-4.8	R_deoxyguanylate_kinase__dGMPATP_	YDR454C	S_Purine_and_Pyrimidine_Biosynthesis
{'M_23dhmb_m': 1.0} <==> {'M_h2o_m': 1.0, 'M_3mob_m': 1.0}	R_DHAD1m	0.202	R_dihydroxy_acid_dehydratase__2_3_dihydroxy_3_methylbutanoate___mitochondrial	YJR016C	S_Valine__Leucine__and_Isoleucine_Metabolism
{'M_23dhmp_m': 1.0} <==> {'M_3mop_m': 1.0, 'M_h2o_m': 1.0}	R_DHAD2m	0.003	R_dihydroxy_acid_dehydratase__2_3_dihydroxy_3_methylpentanoate___mitochondrial	YJR016C	S_Valine__Leucine__and_Isoleucine_Metabolism
{'M_nadph_c': 1.0, 'M_h_c': 1.0, 'M_dhf_c': 1.0} <==> {'M_nadp_c': 1.0, 'M_thf_c': 1.0}	R_DHFRi	7.202	R_dihydrofolate_reductase__irreversible_	YOR236W	S_Folate_Metabolism
{'M_glu_L_c': 1.0, 'M_atp_c': 1.0, 'M_dhpt_c': 1.0} <==> {'M_pi_c': 1.0, 'M_h_c': 1.0, 'M_adp_c': 1.0, 'M_dhf_c': 1.0}	R_DHFS	0.002	R_dihydrofolate_synthase		S_Folate_Metabolism
{'M_dhnpt_m': 1.0} <==> {'M_2ahhmp_m': 1.0, 'M_h_m': 1.0, 'M_gcald_m': 1.0}	R_DHNPAm	0.002	R_dihydroneopterin_aldolase	YNL256W	S_Folate_Metabolism
{'M_dhnpt_c': 1.0} <==> {'M_dhnpt_m': 1.0}	R_DHNPTtm	0.002	R_dhnpt_mitochondrial_transport		S_Transport__Mitochondrial
{'M_fum_c': 1.0, 'M_dhor_S_c': 1.0} ---> {'M_orot_c': 1.0, 'M_succ_c': 1.0}	R_DHORDfum	209.201	R_Fumarate_dependent_DHORD	YKL216W	S_Purine_and_Pyrimidine_Biosynthesis
{'M_h2o_c': 1.0, 'M_dhor_S_c': 1.0} <==> {'M_h_c': 1.0, 'M_cbasp_c': 1.0}	R_DHORTS	-209.201	R_dihydroorotase	( YLR420W or YJL130C )	S_Purine_and_Pyrimidine_Biosynthesis
{'M_dhpt_c': 1.0} <==> {'M_dhpt_m': 1.0}	R_DHPTtm	-0.002	R_Dihydropteroate_mitochondrial_transport_via_diffusion		S_Transport__Mitochondrial
{'M_2dda7p_c': 1.0} <==> {'M_pi_c': 1.0, 'M_3dhq_c': 1.0}	R_DHQS	571.996	R_3_dehydroquinate_synthase	YDR127W	S_Tyrosine__Tryptophan__and_Phenylalanine_Metabolism
{'M_3dhq_c': 1.0} <==> {'M_h2o_c': 1.0, 'M_3dhsk_c': 1.0}	R_DHQTi	571.996	R_3_dehydroquinate_dehydratase__irreversible	YDR127W	S_Tyrosine__Tryptophan__and_Phenylalanine_Metabolism
{'M_h2o_c': 3.0, 'M_dkmpp_c': 1.0} <==> {'M_pi_c': 1.0, 'M_2kmb_c': 1.0, 'M_h_c': 6.0, 'M_for_c': 1.0}	R_DKMPPD2	572.195	R_2_3_diketo_5_methylthio_1_phosphopentane_degradation_reaction	( YMR009W and YEL038W )	S_Methionine_Metabolism
{'M_ipdp_c': 1.0, 'M_dmpp_c': 1.0} <==> {'M_ppi_c': 1.0, 'M_grdp_c': 1.0}	R_DMATT	0.004	R_dimethylallyltranstransferase	YJL167W	S_Sterol_Metabolism
{'M_dhpmp_c': 1.0, 'M_h2o_c': 1.0} ---> {'M_pi_c': 1.0, 'M_dhnpt_c': 1.0}	R_DNMPPA	0.002	R_Dihydroneopterin_monophosphate_dephosphorylase	YDL100C	S_Folate_Metabolism
{'M_h2o_c': 1.0, 'M_ahdt_c': 1.0} ---> {'M_dhpmp_c': 1.0, 'M_ppi_c': 1.0, 'M_h_c': 1.0}	R_DNTPPA	0.002	R_Dihydroneopterin_triphosphate_pyrophosphatase		S_Folate_Metabolism
{'M_dolmanp_r': 1.0} <==> {'M_h_r': 1.0, 'M_dolp_r': 1.0, 'M_mannan_r': 1.0}	R_DOLPMMer	1615.8	R_Dolichyl_phosphate_mannose__protein_mannosyltransferase__endoplasmic_reticular	( ( YDL095W and YAL023C ) or YOR321W or YJR143C or YDL093W or YGR199W )	S_Glycoprotein_Metabolism
{'M_gdpmann_c': 1.0, 'M_dolp_c': 1.0} <==> {'M_dolmanp_r': 1.0, 'M_gdp_c': 1.0}	R_DOLPMTcer	1615.8	R_Dolichyl_phosphate_D_mannosyltransferase	YPR183W	S_Glycoprotein_Metabolism
{'M_h_c': 1.0, 'M_dolp_c': 1.0} <==> {'M_h_r': 1.0, 'M_dolp_r': 1.0}	R_DOLPt2er	-1615.8	R_dolichol_phosphate_endoplasmic_reticular_transport_via_proton_symport		S_Transport__Endoplasmic_Reticular
{'M_dpcoa_c': 1.0, 'M_atp_c': 1.0} <==> {'M_h_c': 1.0, 'M_adp_c': 1.0, 'M_coa_c': 1.0}	R_DPCOAK	0.00200001	R_dephospho_CoA_kinase		S_Pantothenate_and_CoA_Biosynthesis
{'M_5dpmev_c': 1.0, 'M_atp_c': 1.0} <==> {'M_co2_c': 1.0, 'M_adp_c': 1.0, 'M_ipdp_c': 1.0, 'M_pi_c': 1.0}	R_DPMVD	0.018	R_diphosphomevalonate_decarboxylase	YNR043W	S_Sterol_Metabolism
{'M_nadph_m': 1.0, 'M_h_m': 1.0, 'M_2dhp_m': 1.0} <==> {'M_pant_R_m': 1.0, 'M_nadp_m': 1.0}	R_DPRm	572.195	R_2_dehydropantoate_2_reductase__mitochondrial	YLR355C	S_Pantothenate_and_CoA_Biosynthesis
{'M_nadph_c': 1.0, 'M_h_c': 1.0, 'M_25dhpp_c': 1.0} <==> {'M_25dthpp_c': 1.0, 'M_nadp_c': 1.0}	R_DROPPRy	1.982	R_2_5_diamino_6_ribosylamino_4_3H__pyrimidinone_5__phosphate_reductase__nadph_	YBR153W	S_Riboflavin_Metabolism
{'M_h2o_c': 1.0, 'M_h_c': 1.0, 'M_25dthpp_c': 1.0} <==> {'M_nh4_c': 1.0, 'M_5aprbu_c': 1.0}	R_DRTPPD	1.982	R_2_5_diamino_6_ribitylamino_4_3H__pyrimidinone_5__phosphate_deaminase	YOL066C	S_Riboflavin_Metabolism
{'M_duri_c': 1.0, 'M_atp_c': 1.0} ---> {'M_dump_c': 1.0, 'M_h_c': 1.0, 'M_adp_c': 1.0}	R_DURIK1	11.998	R_deoxyuridine_kinase__ATPDeoxyuridine_		S_Purine_and_Pyrimidine_Biosynthesis
{'M_duri_c': 1.0, 'M_pi_c': 1.0} <==> {'M_ura_c': 1.0, 'M_2dr1p_c': 1.0}	R_DURIPP	-11.998	R_deoxyuridine_phosphorylase	YLR209C	S_Purine_and_Pyrimidine_Biosynthesis
{'M_h2o_c': 1.0, 'M_dutp_c': 1.0} <==> {'M_dump_c': 1.0, 'M_ppi_c': 1.0, 'M_h_c': 1.0}	R_DUTPDP	0.002	R_dUTP_diphosphatase	YBR252W	S_Purine_and_Pyrimidine_Biosynthesis
{'M_lac_D_c': 1.0, 'M_pyr_m': 1.0} <==> {'M_pyr_c': 1.0, 'M_lac_D_m': 1.0}	R_D_LACt2m	-0.001	R_D_lactatepyruvate_antiport__mitochondrial		S_Transport__Mitochondrial
{'M_lac_D_c': 1.0, 'M_h_c': 1.0} <==> {'M_lac_D_m': 1.0, 'M_h_m': 1.0}	R_D_LACtm	0.001	R_D_lactate_transport__mitochondrial		S_Transport__Mitochondrial
{'M_2pg_c': 1.0} <==> {'M_h2o_c': 1.0, 'M_pep_c': 1.0}	R_ENO	203981	R_enolase	( YPL281C or YGR254W or YHR174W or YOR393W or YMR323W )	S_GlycolysisGluconeogenesis
{'M_ergst_r': 1.0} <==> {'M_ergst_c': 1.0}	R_ERGSTter	1.4	R_ergosterol_endoplasmic_reticular_transport		S_Transport__Endoplasmic_Reticular
{'M_ergtetrol_c': 1.0} <==> {'M_ergtetrol_r': 1.0}	R_ERGTETROLter	1.4	R_Ergosta_5_6_22_24__28__tetraen_3beta_ol_endoplamic_reticular_transport		S_Transport__Endoplasmic_Reticular
{'M_etha_c': 1.0, 'M_atp_c': 1.0} <==> {'M_h_c': 1.0, 'M_adp_c': 1.0, 'M_ethamp_c': 1.0}	R_ETHAK	8.9	R_Ethanolamine_kinase	YDR147W	S_Phospholipid_Biosynthesis
{'M_cdpea_c': 1.0, 'M_12dgr_SC_c': 0.01} <==> {'M_pe_SC_c': 0.01, 'M_h_c': 1.0, 'M_cmp_c': 1.0}	R_ETHAPT_SC	8.9	R_Ethanolaminephosphotransferase__yeast_specific	YHR123W	S_Phospholipid_Biosynthesis
{'M_etha_e': 1.0} <==> {'M_etha_c': 1.0}	R_ETHAt	8.9	R_ethanolamine_transport_via_diffusion__extracellular_		S_Transport__Extracellular
{'M_2mbac_e': 1.0} <==> {'M_2mbac_b': 1.0}	R_EX_2mbac_e_	0.002	R_2_methylbutyl_acetate_exchange		S_
{'M_3c3hmp_e': 1.0} <==> {'M_3c3hmp_b': 1.0}	R_EX_3c3hmp_e_	0.001	R_3_Carboxy_3_hydroxy_4_methylpentanoate_exchange		S_
{'M_4abz_e': 1.0} <==> {'M_4abz_b': 1.0}	R_EX_4abz_e_	-0.002	R_4_Aminobenzoate_exchange		S_
{'M_5aop_e': 1.0} <==> {'M_5aop_b': 1.0}	R_EX_5aop_e_	-0.016	R_5_Amino_4_oxopentanoate_exchange		S_
{'M_acald_e': 1.0} <==> {'M_acald_b': 1.0}	R_EX_acald_e_	-8622.56	R_Acetaldehyde_exchange		S_
{'M_ade_e': 1.0} <==> {'M_ade_b': 1.0}	R_EX_ade_e_	-7886.59	R_Adenine_exchange		S_
{'M_arg_L_e': 1.0} <==> {'M_arg_L_b': 1.0}	R_EX_arg_L_e_	-7259.34	R_L_Arginine_exchange		S_
{'M_btd_RR_e': 1.0} <==> {'M_btd_RR_b': 1.0}	R_EX_btd_RR_e_	0.002	R__R_R__2_3_Butanediol_exchange		S_
{'M_chol_e': 1.0} <==> {'M_chol_b': 1.0}	R_EX_chol_e_	-12	R_Choline_exchange		S_
{'M_cit_e': 1.0} <==> {'M_cit_b': 1.0}	R_EX_cit_e_	-572.4	R_Citrate_exchange		S_
{'M_csn_e': 1.0} <==> {'M_csn_b': 1.0}	R_EX_csn_e_	-11.999	R_Cytosine_exchange		S_
{'M_cys_L_e': 1.0} <==> {'M_cys_L_b': 1.0}	R_EX_cys_L_e_	-13.201	R_L_Cysteine_exchange		S_
{'M_dad_2_e': 1.0} <==> {'M_dad_2_b': 1.0}	R_EX_dad_2_e_	-11.998	R_Deoxyadenosine_exchange		S_
{'M_dca_e': 1.0} <==> {'M_dca_b': 1.0}	R_EX_dca_e_	2.23988	R_Decanoate__n_C100__exchange		S_
{'M_ddca_e': 1.0} <==> {'M_ddca_b': 1.0}	R_EX_ddca_e_	6.71965	R_Dodecanoate__n_C120__exchange		S_
{'M_etha_e': 1.0} <==> {'M_etha_b': 1.0}	R_EX_etha_e_	-8.9	R_Ethanolamine_exchange		S_
{'M_fe2_e': 1.0} <==> {'M_fe2_b': 1.0}	R_EX_fe2_e_	-0.002	R_Fe2_exchange		S_
{'M_fmn_e': 1.0} <==> {'M_fmn_b': 1.0}	R_EX_fmn_e_	-0.001	R_FMN_exchange		S_
{'M_fru_e': 1.0} <==> {'M_fru_b': 1.0}	R_EX_fru_e_	-0.001	R_D_Fructose_exchange		S_
{'M_g3pi_e': 1.0} <==> {'M_g3pi_b': 1.0}	R_EX_g3pi_e_	55.9971	R_sn_Glycero_3_phospho_1_inositol_exchange		S_
{'M_gam6p_e': 1.0} <==> {'M_gam6p_b': 1.0}	R_EX_gam6p_e_	-0.001	R_D_Glucosamine_6_phosphate_exchange		S_
{'M_gcald_e': 1.0} <==> {'M_gcald_b': 1.0}	R_EX_gcald_e_	0.002	R_Glycolaldehyde_exchange		S_
{'M_glc_D_e': 1.0} <==> {'M_glc_D_b': 1.0}	R_EX_glc_e_	-106839	R_D_Glucose_exchange		S_
{'M_gln_L_e': 1.0} <==> {'M_gln_L_b': 1.0}	R_EX_gln_L_e_	-814.402	R_L_Glutamine_exchange		S_
{'M_h_e': 1.0} <==> {'M_h_b': 1.0}	R_EX_h_e_	209052	R_H_exchange		S_
{'M_hdca_e': 1.0} <==> {'M_hdca_b': 1.0}	R_EX_hdca_e_	-0.00352937	R_Hexadecanoate__n_C160__exchange		S_
{'M_his_L_e': 1.0} <==> {'M_his_L_b': 1.0}	R_EX_his_L_e_	445.544	R_L_Histidine_exchange		S_
{'M_hxan_e': 1.0} <==> {'M_hxan_b': 1.0}	R_EX_hxan_e_	8472.19	R_Hypoxanthine_exchange		S_
{'M_iamac_e': 1.0} <==> {'M_iamac_b': 1.0}	R_EX_iamac_e_	0.00099997	R_isoamyl_acetate_exchange		S_
{'M_ibutac_e': 1.0} <==> {'M_ibutac_b': 1.0}	R_EX_ibutac_e_	0.001	R_isobutyl_acetate_exchange		S_
{'M_id3acald_e': 1.0} <==> {'M_id3acald_b': 1.0}	R_EX_id3acald_e_	-208714	R_Indole_3_acetaldehyde_exchange		S_
{'M_ile_L_e': 1.0} <==> {'M_ile_L_b': 1.0}	R_EX_ile_L_e_	-385.399	R_L_Isoleucine_exchange		S_
{'M_ind3eth_e': 1.0} <==> {'M_ind3eth_b': 1.0}	R_EX_ind3eth_e_	208714	R_Indole_3_ethanol_exchange		S_
{'M_inost_e': 1.0} <==> {'M_inost_b': 1.0}	R_EX_inost_e_	-10.6	R_myo_Inositol_exchange		S_
{'M_lac_L_e': 1.0} <==> {'M_lac_L_b': 1.0}	R_EX_lac_L_e_	0.001	R_L_Lactate_exchange		S_
{'M_leu_L_e': 1.0} <==> {'M_leu_L_b': 1.0}	R_EX_leu_L_e_	-592.801	R_L_Leucine_exchange		S_
{'M_man_e': 1.0} <==> {'M_man_b': 1.0}	R_EX_man_e_	-1615.8	R_D_Mannose_exchange		S_
{'M_met_L_e': 1.0} <==> {'M_met_L_b': 1.0}	R_EX_met_L_e_	-101.401	R_L_Methionine_exchange		S_
{'M_nadp_e': 1.0} <==> {'M_nadp_b': 1.0}	R_EX_nadp_e_	-0.002	R_Nicotinamide_adenine_dinucleotide_phosphate_exchange		S_
{'M_nh4_e': 1.0} <==> {'M_nh4_b': 1.0}	R_EX_nh4_e_	-992.819	R_Ammonia_exchange		S_
{'M_o2_e': 1.0} <==> {'M_o2_b': 1.0}	R_EX_o2_e_	-965.818	R_O2_exchange		S_
{'M_ocdca_e': 1.0} <==> {'M_ocdca_b': 1.0}	R_EX_ocdca_e_	-0.000294114	R_octadecanoate__n_C180__exchange		S_
{'M_pap_e': 1.0} <==> {'M_pap_b': 1.0}	R_EX_pap_e_	-771.591	R_Adenosine_3__5__bisphosphate_exchange		S_
{'M_phe_L_e': 1.0} <==> {'M_phe_L_b': 1.0}	R_EX_phe_L_e_	-8266.34	R_L_Phenylalanine_exchange		S_
{'M_pheac_e': 1.0} <==> {'M_pheac_b': 1.0}	R_EX_pheac_e_	7998.54	R_Phenethyl_acetate_exchange		S_
{'M_pi_e': 1.0} <==> {'M_pi_b': 1.0}	R_EX_pi_e_	1147.77	R_Phosphate_exchange		S_
{'M_pnto_R_e': 1.0} <==> {'M_pnto_R_b': 1.0}	R_EX_pnto_R_e_	572.193	R__R__Pantothenate_exchange		S_
{'M_pro_L_e': 1.0} <==> {'M_pro_L_b': 1.0}	R_EX_pro_L_e_	6608.54	R_L_Proline_exchange		S_
{'M_ptd1ino_SC_e': 1.0} <==> {'M_ptd1ino_SC_b': 1.0}	R_EX_ptd1ino_SC_e_	-0.559971	R_phosphatidyl_1D_myo_inositol__yeast_specific_exchange		S_
{'M_ptrc_e': 1.0} <==> {'M_ptrc_b': 1.0}	R_EX_ptrc_e_	0.001	R_Putrescine_exchange		S_
{'M_pyr_e': 1.0} <==> {'M_pyr_b': 1.0}	R_EX_pyr_e_	200529	R_Pyruvate_exchange		S_
{'M_ribflv_e': 1.0} <==> {'M_ribflv_b': 1.0}	R_EX_ribflv_e_	0.001	R_Riboflavin_exchange		S_
{'M_so4_e': 1.0} <==> {'M_so4_b': 1.0}	R_EX_so4_e_	-40	R_Sulfate_exchange		S_
{'M_thm_e': 1.0} <==> {'M_thm_b': 1.0}	R_EX_thm_e_	0.001	R_Thiamin_exchange		S_
{'M_thmmp_e': 1.0} <==> {'M_thmmp_b': 1.0}	R_EX_thmmp_e_	-0.002	R_Thiamin_monophosphate_exchange		S_
{'M_thmpp_e': 1.0} <==> {'M_thmpp_b': 1.0}	R_EX_thmpp_e_	-0.001	R_Thiamine_diphosphate_exchange		S_
{'M_tre_e': 1.0} <==> {'M_tre_b': 1.0}	R_EX_tre_e_	-46.81	R_Trehalose_exchange		S_
{'M_trp_L_e': 1.0} <==> {'M_trp_L_b': 1.0}	R_EX_trp_L_e_	-56.8	R_L_Tryptophan_exchange		S_
{'M_ttdca_e': 1.0} <==> {'M_ttdca_b': 1.0}	R_EX_ttdca_e_	0.00241177	R_tetradecanoate__n_C140__exchange		S_
{'M_tyr_L_e': 1.0} <==> {'M_tyr_L_b': 1.0}	R_EX_tyr_L_e_	367.994	R_L_Tyrosine_exchange		S_
{'M_urea_e': 1.0} <==> {'M_urea_b': 1.0}	R_EX_urea_e_	15836.8	R_Urea_exchange		S_
{'M_val_L_e': 1.0} <==> {'M_val_L_b': 1.0}	R_EX_val_L_e_	-1101.19	R_L_Valine_exchange		S_
{'M_zymst_e': 1.0} <==> {'M_zymst_b': 1.0}	R_EX_zymst_e_	-4.399	R_zymosterol_exchange		S_
{'M_ttdca_c': 1.0, 'M_atp_c': 1.0, 'M_coa_c': 1.0} <==> {'M_ppi_c': 1.0, 'M_tdcoa_c': 1.0, 'M_amp_c': 1.0}	R_FACOAL140	11.205	R_fatty_acid__CoA_ligase__tetradecanoate_	( YOR317W or YIL009W or YMR246W )	S_Fatty_Acid__Biosynthesis
{'M_hdca_c': 1.0, 'M_atp_c': 1.0, 'M_coa_c': 1.0} <==> {'M_ppi_c': 1.0, 'M_pmtcoa_c': 1.0, 'M_amp_c': 1.0}	R_FACOAL160	30.2535	R_fatty_acid__CoA_ligase__hexadecanoate_	( YOR317W or YIL009W or YMR246W )	S_Fatty_Acid__Biosynthesis
{'M_atp_c': 1.0, 'M_hdcea_c': 1.0, 'M_coa_c': 1.0} <==> {'M_ppi_c': 1.0, 'M_hdcoa_c': 1.0, 'M_amp_c': 1.0}	R_FACOAL161	19.0485	R_fatty_acid__CoA_ligase__hexadecenoate_	( YOR317W or YIL009W or YMR246W )	S_Fatty_Acid__Biosynthesis
{'M_ocdca_c': 1.0, 'M_atp_c': 1.0, 'M_coa_c': 1.0} <==> {'M_ppi_c': 1.0, 'M_stcoa_c': 1.0, 'M_amp_c': 1.0}	R_FACOAL180	5.6025	R_fatty_acid__CoA_ligase__octadecanoate_	( YOR317W or YIL009W or YMR246W )	S_Fatty_Acid__Biosynthesis
{'M_ocdcea_c': 1.0, 'M_atp_c': 1.0, 'M_coa_c': 1.0} <==> {'M_ppi_c': 1.0, 'M_odecoa_c': 1.0, 'M_amp_c': 1.0}	R_FACOAL181	26.8925	R_fatty_acid__CoA_ligase__octadecenoate_	( YOR317W or YIL009W or YMR246W )	S_Fatty_Acid__Biosynthesis
{'M_atp_c': 1.0, 'M_coa_c': 1.0, 'M_ocdcya_c': 1.0} <==> {'M_ppi_c': 1.0, 'M_ocdycacoa_c': 1.0, 'M_amp_c': 1.0}	R_FACOAL182	10.084	R_fatty_acid__CoA_ligase__octadecynoate_	( YOR317W or YMR246W or YIL009W )	S_Fatty_Acid__Biosynthesis
{'M_malcoa_c': 1.0, 'M_nadph_c': 2.0, 'M_h_c': 3.0, 'M_occoa_c': 1.0} <==> {'M_h2o_c': 1.0, 'M_co2_c': 1.0, 'M_nadp_c': 2.0, 'M_coa_c': 1.0, 'M_dcacoa_c': 1.0}	R_FAS100COA	8.964	R_fatty_acyl_CoA_synthase__n_C100CoA_	( YGR037C and YNR016C and ( YKL182W and YPL231W ) )	S_Fatty_Acid__Biosynthesis
{'M_malcoa_c': 1.0, 'M_nadph_c': 2.0, 'M_h_c': 3.0, 'M_dca_c': 1.0} <==> {'M_h2o_c': 1.0, 'M_co2_c': 1.0, 'M_ddca_c': 1.0, 'M_coa_c': 1.0, 'M_nadp_c': 2.0}	R_FAS120	0.001	R_fatty_acid_synthase__n_C120_	( YGR037C and YNR016C and ( YKL182W and YPL231W ) )	S_Fatty_Acid__Biosynthesis
{'M_malcoa_c': 1.0, 'M_nadph_c': 2.0, 'M_h_c': 3.0, 'M_dcacoa_c': 1.0} <==> {'M_h2o_c': 1.0, 'M_co2_c': 1.0, 'M_ddcacoa_c': 1.0, 'M_nadp_c': 2.0, 'M_coa_c': 1.0}	R_FAS120COA	6.723	R_fatty_acyl_CoA_synthase__n_C120CoA_	( YGR037C and YNR016C and ( YKL182W and YPL231W ) )	S_Fatty_Acid__Biosynthesis
{'M_malcoa_c': 1.0, 'M_nadph_c': 2.0, 'M_h_c': 3.0, 'M_ddca_c': 1.0} <==> {'M_h2o_c': 1.0, 'M_co2_c': 1.0, 'M_ttdca_c': 1.0, 'M_nadp_c': 2.0, 'M_coa_c': 1.0}	R_FAS140	0.004	R_fatty_acid_synthase__n_C140_	( YGR037C and YNR016C and ( YKL182W and YPL231W ) )	S_Fatty_Acid__Biosynthesis
{'M_malcoa_c': 1.0, 'M_nadph_c': 3.0, 'M_o2_c': 1.0, 'M_h_c': 4.0, 'M_ttdca_c': 1.0} <==> {'M_h2o_c': 3.0, 'M_co2_c': 1.0, 'M_hdcea_c': 1.0, 'M_coa_c': 1.0, 'M_nadp_c': 3.0}	R_FAS161	0.001	R_fatty_acid_synthase__n_C161_	YJL196C	S_Fatty_Acid__Biosynthesis
{'M_malcoa_c': 1.0, 'M_hdca_c': 1.0, 'M_o2_c': 1.0, 'M_nadph_c': 3.0, 'M_h_c': 4.0} <==> {'M_h2o_c': 3.0, 'M_co2_c': 1.0, 'M_ocdcea_c': 1.0, 'M_nadp_c': 3.0, 'M_coa_c': 1.0}	R_FAS181	0.00194115	R_fatty_acid_synthase__n_C181_	YJL196C	S_Fatty_Acid__Biosynthesis
{'M_accoa_c': 1.0, 'M_malcoa_c': 3.0, 'M_nadph_c': 6.0, 'M_h_c': 9.0} <==> {'M_h2o_c': 3.0, 'M_co2_c': 3.0, 'M_occoa_c': 1.0, 'M_nadp_c': 6.0, 'M_coa_c': 3.0}	R_FAS80COA_L	8.964	R_fatty_acyl_CoA_synthase__n_C80CoA___lumped_reaction	( YGR037C and YNR016C and ( YKL182W and YPL231W ) )	S_Fatty_Acid__Biosynthesis
{'M_s17bp_c': 1.0} <==> {'M_e4p_c': 1.0, 'M_dhap_c': 1.0}	R_FBA3	102815	R_Sedoheptulose_1_7_bisphosphate_D_glyceraldehyde_3_phosphate_lyase	YKL060C	S_GlycolysisGluconeogenesis
{'M_h2o_c': 1.0, 'M_f26bp_c': 1.0} <==> {'M_pi_c': 1.0, 'M_f6p_c': 1.0}	R_FBP26	0.001	R_Fructose_2_6_bisphosphate_2_phosphatase	YJL155C	S_Fructose_and_Mannose_Metabolism
{'M_ppp9_m': 1.0, 'M_fe2_m': 1.0} <==> {'M_h_m': 2.0, 'M_pheme_m': 1.0}	R_FCLTm	0.002	R_Ferrochelatase__mitochondrial	YOR176W	S_Porphyrin_and_Chlorophyll_Metabolism
{'M_fe2_e': 1.0} <==> {'M_fe2_c': 1.0}	R_FE2t	0.002	R_iron__II__transport	YMR319C	S_Transport__Extracellular
{'M_fe2_c': 1.0} <==> {'M_fe2_m': 1.0}	R_FE2utm	0.002	R_iron__II__uptake__mitochondrial_		S_Transport__Mitochondrial
{'M_h_c': 1.0, 'M_atp_c': 1.0, 'M_fmn_c': 1.0} <==> {'M_ppi_c': 1.0, 'M_fad_c': 1.0}	R_FMNAT	0.002	R_FMN_adenylyltransferase	YDL045C	S_Riboflavin_Metabolism
{'M_4abz_m': 1.0, 'M_2ahhmd_m': 1.0} ---> {'M_dhpt_m': 1.0, 'M_ppi_m': 1.0}	R_FOLD3m	0.002	R_dihydropteroate_synthase__mitochondrial	YNL256W	S_Folate_Metabolism
{'M_fum_c': 1.0, 'M_fadh2_m': 1.0} <==> {'M_fad_m': 1.0, 'M_succ_c': 1.0}	R_FRDcm	363.199	R_fumarate_reductase__cytosolicmitochondrial	YEL047C	S_Transport__Mitochondrial
{'M_frdp_c': 1.0, 'M_ipdp_c': 1.0} <==> {'M_ppi_c': 1.0, 'M_ggdp_c': 1.0}	R_FRTT	0.002	R_farnesyltranstransferase	YPL069C	S_Sterol_Metabolism
{'M_fru_e': 1.0, 'M_h_e': 1.0} <==> {'M_h_c': 1.0, 'M_fru_c': 1.0}	R_FRUt2	0.001	R_D_fructose_transport_in_via_proton_symport	( YHR094C or YFL011W or YOL156W or YEL069C or YDL245C or YJR158W or YNR072W or YMR011W or YDR345C or YHR092C or YHR096C or YDR343C or YDR342C or YJL214W or YJL219W )	S_Transport__Extracellular
{'M_for_c': 1.0, 'M_atp_c': 1.0, 'M_thf_c': 1.0} ---> {'M_pi_c': 1.0, 'M_adp_c': 1.0, 'M_10fthf_c': 1.0}	R_FTHFLi	578.144	R_formate_tetrahydrofolate_ligase	YGR204W	S_Folate_Metabolism
{'M_h2o_c': 1.0, 'M_fum_c': 1.0} <==> {'M_mal_L_c': 1.0}	R_FUM	8805.84	R_fumarase	YPL262W	S_Oxidative_Phosphorylation
{'M_h2o_m': 1.0, 'M_fum_m': 1.0} <==> {'M_mal_L_m': 1.0}	R_FUMm	572.4	R_fumarase__mitochondrial	YPL262W	S_Oxidative_Phosphorylation
{'M_dhap_m': 1.0, 'M_h_m': 1.0, 'M_nadh_m': 1.0} <==> {'M_nad_m': 1.0, 'M_glyc3p_m': 1.0}	R_G3PD1irm	363.199	R_glycerol_3_phosphate_dehydrogenase__NAD___mitochondrial	YOL059W	S_Glycerolipid_Metabolism
{'M_fad_m': 1.0, 'M_glyc3p_m': 1.0} <==> {'M_fadh2_m': 1.0, 'M_dhap_m': 1.0}	R_G3PDm	363.199	R_glycerol_3_phosphate_dehydrogenase__FAD___mitochondrial	YIL155C	S_Glycerolipid_Metabolism
{'M_glyc3p_c': 1.0, 'M_h2o_c': 1.0} <==> {'M_pi_c': 1.0, 'M_glyc_c': 1.0}	R_G3PT	0.001	R_glycerol_3_phosphatase	( YER062C or YIL053W )	S_Glycerolipid_Metabolism
{'M_glu5sa_c': 1.0} <==> {'M_h2o_c': 1.0, 'M_1pyr5c_c': 1.0, 'M_h_c': 1.0}	R_G5SADr	6937.94	R_L_glutamate_5_semialdehyde_dehydratase__reversible		S_Arginine_and_Proline_Metabolism
{'M_g6p_r': 1.0, 'M_nadp_r': 1.0} <==> {'M_h_r': 1.0, 'M_nadph_r': 1.0, 'M_6pgl_r': 1.0}	R_G6PDH2er	1.401	R_glucose_6_phosphate_dehydrogenase__endoplasmic_reticulum		S_Pentose_Phosphate_Pathway
{'M_g6p_c': 1.0} <==> {'M_g6p_B_c': 1.0}	R_G6PI	103531	R_Glucose_6_phosphate_isomerase	YBR196C	S_GlycolysisGluconeogenesis
{'M_g6p_B_c': 1.0} <==> {'M_f6p_c': 1.0}	R_G6PI3	103531	R_Glucose_6_phosphate_isomerase	YBR196C	S_GlycolysisGluconeogenesis
{'M_g6p_c': 1.0} <==> {'M_g6p_r': 1.0}	R_G6Pter	1.401	R_glucose_6_phosphate_endoplasmic_reticular_transport_via_diffusion		S_Transport__Endoplasmic_Reticular
{'M_utp_c': 1.0, 'M_h_c': 1.0, 'M_g1p_c': 1.0} <==> {'M_ppi_c': 1.0, 'M_udpg_c': 1.0}	R_GALU	3306.6	R_UTP_glucose_1_phosphate_uridylyltransferase	( YKL035W or YHL012W )	S_Galactose_metabolism
{'M_gam6p_e': 1.0} <==> {'M_gam6p_c': 1.0}	R_GAM6Pt	0.001	R_D_glucosamine_6_phosphate_reversible_uniport		S_Transport__Extracellular
{'M_pi_c': 1.0, 'M_nad_c': 1.0, 'M_g3p_c': 1.0} <==> {'M_13dpg_c': 1.0, 'M_h_c': 1.0, 'M_nadh_c': 1.0}	R_GAPD	204936	R_glyceraldehyde_3_phosphate_dehydrogenase	( YJL052W or YJR009C or YGR192C )	S_GlycolysisGluconeogenesis
{'M_ddcacoa_c': 0.059999999999999998, 'M_dcacoa_c': 0.02, 'M_tdcoa_c': 0.10000000000000001, 'M_ocdycacoa_c': 0.089999999999999997, 'M_pmtcoa_c': 0.27000000000000002, 'M_dhap_c': 1.0, 'M_hdcoa_c': 0.17000000000000001, 'M_stcoa_c': 0.050000000000000003, 'M_odecoa_c': 0.23999999999999999} ---> {'M_coa_c': 1.0, 'M_1agly3p_SC_c': 0.01}	R_GAT2_SC	49.4	R_glycerol_3_phosphate_acyltransferase__glycerone_phosphate___yeast_specific	( YKR067W or YBL011W )	S_Phospholipid_Biosynthesis
{'M_gcald_e': 1.0} <==> {'M_gcald_c': 1.0}	R_GCALDt	-0.002	R_Glycoaldehydye_reversible_transport		S_Transport__Extracellular
{'M_gcald_c': 1.0} <==> {'M_gcald_m': 1.0}	R_GCALDtm	-0.002	R_glycoaldehyde_mitochondrial_transport		S_Transport__Mitochondrial
{'M_gln_L_c': 1.0, 'M_f6p_c': 1.0} <==> {'M_glu_L_c': 1.0, 'M_gam6p_c': 1.0}	R_GF6PTA	0.001	R_glutamine_fructose_6_phosphate_transaminase	( YMR085W or YKL104C or YMR084W )	S_Glutamine_Metabolism
{'M_ggdp_c': 1.0, 'M_ipdp_c': 1.0} <==> {'M_ppi_c': 1.0, 'M_pendp_c': 1.0}	R_GGTT	0.002	R_geranylgeranyltranstransferase		S_Quinone_Biosynthesis
{'M_ser_L_c': 1.0, 'M_thf_c': 1.0} <==> {'M_h2o_c': 1.0, 'M_mlthf_c': 1.0, 'M_gly_c': 1.0}	R_GHMT2r	580.8	R_glycine_hydroxymethyltransferase__reversible	YLR058C	S_Glycine_and_Serine_Metabolism
{'M_gmp_c': 1.0, 'M_datp_c': 1.0} <==> {'M_gdp_c': 1.0, 'M_dadp_c': 1.0}	R_GK2	7.2	R_guanylate_kinase__GMPdATP_	YDR454C	S_Purine_and_Pyrimidine_Biosynthesis
{'M_udpg_c': 1.0} <==> {'M_glycogen_c': 1.0, 'M_udp_c': 1.0, 'M_h_c': 1.0}	R_GLCS2	1037	R_glycogen_synthase__UDPGlc_	( ( YKR058W and YLR258W ) or ( YKR058W and YFR015C ) or ( YJL137C and YFR015C ) or ( YJL137C and YLR258W ) )	S_Alternate_Carbon_Metabolism
{'M_glc_D_e': 1.0} <==> {'M_glc_D_c': 1.0}	R_GLCt1	106839	R_glucose_transport__uniport_	( YHR092C or YLR081W or YOL156W or YDR536W or YHR094C or YEL069C or YDL245C or YJR158W or YFL011W or YNR072W or YMR011W or YDR345C or YHR096C or YDR343C or YDR342C or YJL214W or YJL219W )	S_Transport__Extracellular
{'M_glc_D_c': 1.0} <==> {'M_glc_D_v': 1.0}	R_GLCtv	-0.02	R_glucose_transport__vacuolar		S_Transport__Vacuolar
{'M_glu_L_c': 1.0, 'M_atp_c': 1.0, 'M_nh4_c': 1.0} ---> {'M_pi_c': 1.0, 'M_gln_L_c': 1.0, 'M_adp_c': 1.0, 'M_h_c': 1.0}	R_GLNS	9384.81	R_glutamine_synthetase	YPR035W	S_Glutamine_Metabolism
{'M_gln_L_e': 1.0, 'M_h_e': 1.0} <==> {'M_h_c': 1.0, 'M_gln_L_c': 1.0}	R_GLNt2r	814.402	R_L_glutamine_reversible_transport_via_proton_symport	( YKR039W or YCL025C or YDR508C or YPL265W )	S_Transport__Extracellular
{'M_gln_L_c': 1.0, 'M_h_v': 1.0} <==> {'M_h_c': 1.0, 'M_gln_L_v': 1.0}	R_GLNt6	0.001	R_L_glutamine_transport_in_via_proton_antiport__vacuolar_	YJR001W	S_Transport__Vacuolar
{'M_h_v': 1.0, 'M_gln_L_v': 1.0} <==> {'M_h_c': 1.0, 'M_gln_L_c': 1.0}	R_GLNt7	0.001	R_L_glutamine_transport_out_via_proton_symport__vacuolar	( YKL146W or YNL101W )	S_Transport__Vacuolar
{'M_glyc_c': 1.0, 'M_atp_c': 1.0} ---> {'M_glyc3p_c': 1.0, 'M_h_c': 1.0, 'M_adp_c': 1.0}	R_GLYK	0.001	R_glycerol_kinase	YHL032C	S_Glycerolipid_Metabolism
{'M_h2o_c': 1.0, 'M_xmp_c': 1.0, 'M_gln_L_c': 1.0, 'M_atp_c': 1.0} ---> {'M_glu_L_c': 1.0, 'M_gmp_c': 1.0, 'M_h_c': 2.0, 'M_ppi_c': 1.0, 'M_amp_c': 1.0}	R_GMPS2	98.784	R_GMP_synthase	YMR217W	S_Purine_and_Pyrimidine_Biosynthesis
{'M_nadp_c': 1.0, 'M_6pgc_c': 1.0} <==> {'M_co2_c': 1.0, 'M_nadph_c': 1.0, 'M_ru5p_D_c': 1.0}	R_GND	1.401	R_phosphogluconate_dehydrogenase	( YGR256W or YHR183W )	S_Pentose_Phosphate_Pathway
{'M_grdp_c': 1.0, 'M_ipdp_c': 1.0} <==> {'M_ppi_c': 1.0, 'M_frdp_c': 1.0}	R_GRTT	0.004	R_geranyltranstransferase	YJL167W	S_Sterol_Metabolism
{'M_h2o_c': 1.0, 'M_gtp_c': 1.0} <==> {'M_ahdt_c': 1.0, 'M_h_c': 1.0, 'M_for_c': 1.0}	R_GTPCI	0.002	R_GTP_cyclohydrolase_I	YGR267C	S_Folate_Metabolism
{'M_h2o_c': 3.0, 'M_gtp_c': 1.0} <==> {'M_ppi_c': 1.0, 'M_h_c': 2.0, 'M_for_c': 1.0, 'M_25dhpp_c': 1.0}	R_GTPCII	1.982	R_GTP_cyclohydrolase_II	YBL033C	S_Riboflavin_Metabolism
{'M_h2o_c': 2.0, 'M_gtp_c': 1.0} <==> {'M_gmp_c': 1.0, 'M_h_c': 2.0, 'M_pi_c': 2.0}	R_GTPH1	0.001	R_GTP_diphosphohydrolase	YER005W	S_Nucleotide_Salvage_Pathway
{'M_h2o_e': 1.0} <==> {'M_h2o_c': 1.0}	R_H2Ot	-111.999	R_H2O_transport_via_diffusion	( YPR192W or YLL052C )	S_Transport__Extracellular
{'M_h2o_c': 1.0} <==> {'M_h2o_r': 1.0}	R_H2Oter	-0.001	R_H2O_endoplasmic_reticulum_transport		S_Transport__Endoplasmic_Reticular
{'M_h2o_c': 1.0} <==> {'M_h2o_m': 1.0}	R_H2Otm	-373.283	R_H2O_transport__mitochondrial		S_Transport__Mitochondrial
{'M_h2o_c': 1.0} <==> {'M_h2o_v': 1.0}	R_H2Otv	0.00999999	R_H2O_transport__vacuolar		S_Transport__Vacuolar
{'M_b124tc_m': 1.0, 'M_h2o_m': 1.0} <==> {'M_hicit_m': 1.0}	R_HACNHm	572.4	R_homoacontinate_hydratase__mitochondrial	YDR234W	S_Threonine_and_Lysine_Metabolism
{'M_4hbz_m': 1.0, 'M_hexdp_m': 1.0} <==> {'M_3ophb_5_m': 1.0, 'M_ppi_m': 1.0}	R_HBZOPT6m	0.002	R_Hydroxybenzoate_octaprenyltransferase__mitochondrial	YNR041C	S_Quinone_Biosynthesis
{'M_akg_m': 1.0, 'M_h2o_m': 1.0, 'M_accoa_m': 1.0} <==> {'M_coa_m': 1.0, 'M_hcit_m': 1.0, 'M_h_m': 1.0}	R_HCITSm	572.4	R_homocitrate_synthase		S_Pyruvate_Metabolism
{'M_h2o_c': 1.0, 'M_co2_c': 1.0} <==> {'M_h_c': 1.0, 'M_hco3_c': 1.0}	R_HCO3E	10541.1	R_HCO3_equilibration_reaction		S_Other
{'M_hdca_e': 1.0} <==> {'M_hdca_c': 1.0}	R_HDCAt	30.2419	R_Hexadecanoate__n_C160__transport_in_via_uniport		S_Transport__Extracellular
{'M_hdcea_e': 1.0} ---> {'M_hdcea_c': 1.0}	R_HDCEAt	19.039	R_hexadecenoate__n_C161__transport_in_via_uniport		S_Transport__Extracellular
{'M_atp_c': 1.0, 'M_glc_D_c': 1.0} <==> {'M_g6p_c': 1.0, 'M_h_c': 1.0, 'M_adp_c': 1.0}	R_HEX1	106839	R_hexokinase__D_glucoseATP_	( YFR053C or YGL253W or YCL040W )	S_GlycolysisGluconeogenesis
{'M_atp_c': 1.0, 'M_man_c': 1.0} <==> {'M_h_c': 1.0, 'M_adp_c': 1.0, 'M_man6p_c': 1.0}	R_HEX4	1615.8	R_hexokinase__D_mannoseATP_	( YFR053C or YGL253W )	S_GlycolysisGluconeogenesis
{'M_fru_c': 1.0, 'M_atp_c': 1.0} <==> {'M_h_c': 1.0, 'M_adp_c': 1.0, 'M_f6p_c': 1.0}	R_HEX7	0.001	R_hexokinase__D_fructoseATP_	( YFR053C or YGL253W )	S_GlycolysisGluconeogenesis
{'M_hicit_m': 1.0, 'M_nad_m': 1.0} <==> {'M_nadh_m': 1.0, 'M_h_m': 1.0, 'M_oxag_m': 1.0}	R_HICITDm	572.4	R_homoisocitrate_dehydrogenase	YIL094C	S_Threonine_and_Lysine_Metabolism
{'M_h2o_c': 1.0, 'M_nad_c': 2.0, 'M_histd_c': 1.0} <==> {'M_h_c': 3.0, 'M_nadh_c': 2.0, 'M_his_L_c': 1.0}	R_HISTD	578.144	R_histidinol_dehydrogenase	YCL030C	S_Histidine_Metabolism
{'M_h2o_c': 1.0, 'M_hisp_c': 1.0} <==> {'M_pi_c': 1.0, 'M_histd_c': 1.0}	R_HISTP	578.144	R_histidinol_phosphatase	YFR025C	S_Histidine_Metabolism
{'M_his_L_e': 1.0, 'M_h_e': 1.0} <==> {'M_h_c': 1.0, 'M_his_L_c': 1.0}	R_HISt2r	-445.544	R_L_histidine_reversible_transport_via_proton_symport	( YGR191W or YKR039W or YCL025C or YBR069C )	S_Transport__Extracellular
{'M_h2o_c': 1.0, 'M_ppbng_c': 4.0} <==> {'M_hmbil_c': 1.0, 'M_nh4_c': 4.0}	R_HMBS	0.002	R_hydroxymethylbilane_synthase	YDL205C	S_Porphyrin_and_Chlorophyll_Metabolism
{'M_mev_R_c': 1.0, 'M_nadp_c': 2.0, 'M_coa_c': 1.0} <==> {'M_nadph_c': 2.0, 'M_h_c': 2.0, 'M_hmgcoa_c': 1.0}	R_HMGCOAR	-0.018	R_Hydroxymethylglutaryl_CoA_reductase	( YLR450W or YML075C )	S_Sterol_Metabolism
{'M_hmgcoa_c': 1.0, 'M_h_c': 1.0, 'M_coa_c': 1.0} <==> {'M_accoa_c': 1.0, 'M_h2o_c': 1.0, 'M_aacoa_c': 1.0}	R_HMGCOAS	-0.017	R_Hydroxymethylglutaryl_CoA_synthase	YML126C	S_Sterol_Metabolism
{'M_coa_m': 1.0, 'M_h_m': 1.0, 'M_hmgcoa_m': 1.0} <==> {'M_aacoa_m': 1.0, 'M_h2o_m': 1.0, 'M_accoa_m': 1.0}	R_HMGCOASm	-0.001	R_Hydroxymethylglutaryl_CoA_synthase__mitochondrial	YML126C	S_Sterol_Metabolism
{'M_hmgcoa_c': 1.0} <==> {'M_hmgcoa_m': 1.0}	R_HMGCOAtm	-0.001	R_Hydroxymethylglutaryl_CoA_reversible_mitochondrial_transport		S_Transport__Mitochondrial
{'M_2ahhmp_m': 1.0, 'M_atp_m': 1.0} ---> {'M_amp_m': 1.0, 'M_h_m': 1.0, 'M_2ahhmd_m': 1.0}	R_HPPKm	0.002	R_2_amino_4_hydroxy_6_hydroxymethyldihydropteridine_diphosphokinase__mitochondrial	YNL256W	S_Folate_Metabolism
{'M_h_c': 1.0, 'M_nadh_c': 1.0, 'M_aspsa_c': 1.0} <==> {'M_nad_c': 1.0, 'M_hom_L_c': 1.0}	R_HSDxi	382.801	R_homoserine_dehydrogenase__NADH___irreversible	YJR139C	S_Glycine_and_Serine_Metabolism
{'M_nadph_c': 1.0, 'M_h_c': 1.0, 'M_aspsa_c': 1.0} <==> {'M_nadp_c': 1.0, 'M_hom_L_c': 1.0}	R_HSDyi	0.001	R_homoserine_dehydrogenase__NADP___irreversible	YJR139C	S_Glycine_and_Serine_Metabolism
{'M_atp_c': 1.0, 'M_hom_L_c': 1.0} <==> {'M_h_c': 1.0, 'M_adp_c': 1.0, 'M_phom_c': 1.0}	R_HSK	382.802	R_homoserine_kinase	YHR025W	S_Glycine_and_Serine_Metabolism
{'M_glu_L_c': 1.0, 'M_imacp_c': 1.0} <==> {'M_akg_c': 1.0, 'M_hisp_c': 1.0}	R_HSTPT	578.144	R_histidinol_phosphate_transaminase	YIL116W	S_Histidine_Metabolism
{'M_h_e': 1.0, 'M_hxan_e': 1.0} <==> {'M_hxan_c': 1.0, 'M_h_c': 1.0}	R_HXANt2r	-8472.19	R_hypoxanthine_reversible_transport_via_proton_symport		S_Transport__Extracellular
{'M_iamac_c': 1.0} ---> {'M_iamac_e': 1.0}	R_IAMACt	0.00099997	R_Isoamyl_acetate_transport__extracellular_		S_Transport__Extracellular
{'M_ibutac_c': 1.0} ---> {'M_ibutac_e': 1.0}	R_IBUTACt	0.001	R_Isobutyl_acetate_transport__extracellular_		S_Transport__Extracellular
{'M_nadp_m': 1.0, 'M_icit_m': 1.0} ---> {'M_nadph_m': 1.0, 'M_akg_m': 1.0, 'M_co2_m': 1.0}	R_ICDHym	572.4	R_Isocitrate_dehydrogenase__NADP_	YDL066W	S_Citric_Acid_Cycle
{'M_id3acald_c': 1.0} <==> {'M_id3acald_e': 1.0}	R_ID3ACALDt	-208714	R_Indoleacetaldehyde_transport__extracellular_		S_Transport__Extracellular
{'M_gln_L_c': 1.0, 'M_prlp_c': 1.0} <==> {'M_glu_L_c': 1.0, 'M_h_c': 1.0, 'M_eig3p_c': 1.0, 'M_aicar_c': 1.0}	R_IG3PS	578.144	R_Imidazole_glycerol_3_phosphate_synthase	YBR248C	S_Histidine_Metabolism
{'M_eig3p_c': 1.0} <==> {'M_h2o_c': 1.0, 'M_imacp_c': 1.0}	R_IGPDH	578.144	R_imidazoleglycerol_phosphate_dehydratase	YOR202W	S_Histidine_Metabolism
{'M_ile_L_m': 1.0, 'M_akg_m': 1.0} <==> {'M_3mop_m': 1.0, 'M_glu_L_m': 1.0}	R_ILETAm	-0.001	R_isoleucine_transaminase__mitochondrial	YHR208W	S_Valine__Leucine__and_Isoleucine_Metabolism
{'M_ile_L_e': 1.0, 'M_h_e': 1.0} <==> {'M_h_c': 1.0, 'M_ile_L_c': 1.0}	R_ILEt2r	385.399	R_L_isoleucine_reversible_transport_via_proton_symport	( YBR069C or YKR039W or YCL025C or YBR068C or YDR046C )	S_Transport__Extracellular
{'M_h_v': 1.0, 'M_ile_L_c': 1.0} <==> {'M_ile_L_v': 1.0, 'M_h_c': 1.0}	R_ILEt6	0.000999998	R_L_isoleucine_transport_in_via_proton_antiport__vacuolar_	YJR001W	S_Transport__Vacuolar
{'M_ile_L_v': 1.0, 'M_h_v': 1.0} <==> {'M_h_c': 1.0, 'M_ile_L_c': 1.0}	R_ILEt7	0.000999997	R_L_isoleucine_transport_out_via_proton_symport__vacuolar	( YKL146W or YNL101W )	S_Transport__Vacuolar
{'M_ile_L_m': 1.0} <==> {'M_ile_L_c': 1.0}	R_ILEtmi	0.001	R_Isoleucine_transport_from_mitochondria_to_cytosol		S_Transport__Mitochondrial
{'M_h2o_c': 1.0, 'M_imp_c': 1.0} <==> {'M_fprica_c': 1.0}	R_IMPC	-578.144	R_IMP_cyclohydrolase	( YLR028C or YMR120C )	S_Purine_and_Pyrimidine_Biosynthesis
{'M_h2o_c': 1.0, 'M_nad_c': 1.0, 'M_imp_c': 1.0} <==> {'M_xmp_c': 1.0, 'M_h_c': 1.0, 'M_nadh_c': 1.0}	R_IMPD	98.784	R_IMP_dehydrogenase	( YHR216W or YLR432W or YAR075W or YML056C or YAR073W )	S_Purine_and_Pyrimidine_Biosynthesis
{'M_ind3eth_c': 1.0} <==> {'M_ind3eth_e': 1.0}	R_IND3ETHt	208714	R_Tryptophol_transport__extracellular		S_Transport__Extracellular
{'M_inost_e': 1.0, 'M_h_e': 1.0} <==> {'M_inost_c': 1.0, 'M_h_c': 1.0}	R_INSTt2	10.6	R_inositol_transport_in_via_proton_symport	( YDR497C or YOL103W )	S_Transport__Extracellular
{'M_h2o_c': 1.0, 'M_ipc124_SC_c': 0.01} <==> {'M_cer1_24_c': 1.0, 'M_h_c': 1.0, 'M_mi1p_D_c': 1.0}	R_IPC124PLC_SC	0.001	R_inositol_phosphorylceramide__ceramide_1__24C__phospholipase_C	YER019W	S_Sphingolipid_Metabolism
{'M_h2o_c': 1.0, 'M_ipc126_SC_c': 0.01} <==> {'M_h_c': 1.0, 'M_mi1p_D_c': 1.0, 'M_cer1_26_c': 1.0}	R_IPC126PLC_SC	0.001	R_inositol_phosphorylceramide__ceramide_1__26C__phospholipase_C	YER019W	S_Sphingolipid_Metabolism
{'M_h2o_c': 1.0, 'M_ipc224_SC_c': 0.01} <==> {'M_mi1p_D_c': 1.0, 'M_h_c': 1.0, 'M_cer2_24_c': 1.0}	R_IPC224PLC_SC	44.244	R_inositol_phosphorylceramide__ceramide_2__24C__phospholipase_C	YER019W	S_Sphingolipid_Metabolism
{'M_h2o_c': 1.0, 'M_ipc226_SC_c': 0.01} <==> {'M_cer2_26_c': 1.0, 'M_h_c': 1.0, 'M_mi1p_D_c': 1.0}	R_IPC226PLC_SC	0.001	R_inositol_phosphorylceramide__ceramide_2__26C__phospholipase_C	YER019W	S_Sphingolipid_Metabolism
{'M_h2o_c': 1.0, 'M_ipc324_SC_c': 0.01} <==> {'M_h_c': 1.0, 'M_mi1p_D_c': 1.0, 'M_cer3_24_c': 1.0}	R_IPC324PLC_SC	0.001	R_inositol_phosphorylceramide__ceramide_3__24C__phospholipase_C	YER019W	S_Sphingolipid_Metabolism
{'M_h2o_c': 1.0, 'M_ipc326_SC_c': 0.01} <==> {'M_cer3_26_c': 1.0, 'M_h_c': 1.0, 'M_mi1p_D_c': 1.0}	R_IPC326PLC_SC	0.001	R_inositol_phosphorylceramide__ceramide_3__26C__phospholipase_C	YER019W	S_Sphingolipid_Metabolism
{'M_cer1_24_c': 1.0, 'M_ptd1ino_SC_c': 0.01} <==> {'M_ipc124_SC_c': 0.01, 'M_12dgr_SC_c': 0.01}	R_IPCS124_SC	0.001	R_Inositol_phosphorylceramide_synthase__ceramide_1__24C___yeast_specific	YKL004W	S_Sphingolipid_Metabolism
{'M_ptd1ino_SC_c': 0.01, 'M_cer1_26_c': 1.0} <==> {'M_ipc126_SC_c': 0.01, 'M_12dgr_SC_c': 0.01}	R_IPCS126_SC	0.001	R_Inositol_phosphorylceramide_synthase__ceramide_1__26C___yeast_specific	YKL004W	S_Sphingolipid_Metabolism
{'M_ptd1ino_SC_c': 0.01, 'M_cer2_24_c': 1.0} <==> {'M_ipc224_SC_c': 0.01, 'M_12dgr_SC_c': 0.01}	R_IPCS224_SC	44.244	R_Inositol_phosphorylceramide_synthase__ceramide_2__24C___yeast_specific	YKL004W	S_Sphingolipid_Metabolism
{'M_cer2_26_c': 1.0, 'M_ptd1ino_SC_c': 0.01} <==> {'M_ipc226_SC_c': 0.01, 'M_12dgr_SC_c': 0.01}	R_IPCS226_SC	0.001	R_Inositol_phosphoryceramide_synthase__ceramide_2__26C___yeast_specific	YKL004W	S_Sphingolipid_Metabolism
{'M_ptd1ino_SC_c': 0.01, 'M_cer3_24_c': 1.0} <==> {'M_ipc324_SC_c': 0.01, 'M_12dgr_SC_c': 0.01}	R_IPCS324_SC	0.001	R_Inositol_phosphorylceramide_synthase__ceramide_3__24C___yeast_specific	YKL004W	S_Sphingolipid_Metabolism
{'M_cer3_26_c': 1.0, 'M_ptd1ino_SC_c': 0.01} <==> {'M_ipc326_SC_c': 0.01, 'M_12dgr_SC_c': 0.01}	R_IPCS326_SC	0.001	R_Inositol_phosphorylceramide_synthase__ceramide_3__26C___yeast_specific	YKL004W	S_Sphingolipid_Metabolism
{'M_ipdp_c': 1.0} <==> {'M_dmpp_c': 1.0}	R_IPDDI	0.004	R_isopentenyl_diphosphate_D_isomerase	YPL117C	S_Sterol_Metabolism
{'M_ipdp_c': 1.0} <==> {'M_ipdp_m': 1.0}	R_IPDPtm	0.002	R_Isopentenyl_diphosphate_transport__mitochondrial		S_Transport__Mitochondrial
{'M_accoa_c': 1.0, 'M_3mob_c': 1.0, 'M_h2o_c': 1.0} <==> {'M_h_c': 1.0, 'M_3c3hmp_c': 1.0, 'M_coa_c': 1.0}	R_IPPS	0.001	R_2_isopropylmalate_synthase	( YOR108W or YNL104C )	S_Valine__Leucine__and_Isoleucine_Metabolism
{'M_nadph_m': 1.0, 'M_h_m': 1.0, 'M_alac_S_m': 1.0} <==> {'M_23dhmb_m': 1.0, 'M_nadp_m': 1.0}	R_KARA1im	0.202	R_acetohydroxy_acid_isomeroreductase__mitochondrial	YLR355C	S_Valine__Leucine__and_Isoleucine_Metabolism
{'M_nadph_m': 1.0, 'M_2ahbut_m': 1.0, 'M_h_m': 1.0} <==> {'M_nadp_m': 1.0, 'M_23dhmp_m': 1.0}	R_KARA2im	0.003	R_ketol_acid_reductoisomerase__2_Aceto_2_hydroxybutanoate___mitochondrial	YLR355C	S_Valine__Leucine__and_Isoleucine_Metabolism
{'M_nadph_c': 1.0, 'M_h_c': 1.0, 'M_mthgxl_c': 1.0} <==> {'M_lald_L_c': 1.0, 'M_nadp_c': 1.0}	R_LALDO3	0.001	R_L_LactaldehydeNADP_1_oxidoreductase	( YOL151W or YHR104W )	S_Alternate_Carbon_Metabolism
{'M_h2o_c': 1.0, 'M_lald_L_c': 1.0, 'M_nad_c': 1.0} <==> {'M_lac_L_c': 1.0, 'M_h_c': 2.0, 'M_nadh_c': 1.0}	R_LCADi	0.001	R_lactaldehyde_dehydrogenase		S_Alternate_Carbon_Metabolism
{'M_leu_L_c': 1.0, 'M_akg_c': 1.0} <==> {'M_glu_L_c': 1.0, 'M_4mop_c': 1.0}	R_LEUTA	0.00099997	R_leucine_transaminase	YJR148W	S_Valine__Leucine__and_Isoleucine_Metabolism
{'M_h_e': 1.0, 'M_leu_L_e': 1.0} <==> {'M_leu_L_c': 1.0, 'M_h_c': 1.0}	R_LEUt2r	592.801	R_L_leucine_reversible_transport_via_proton_symport	( YBR069C or YKR039W or YCL025C or YBR068C or YDR046C or YDR508C )	S_Transport__Extracellular
{'M_leu_L_c': 1.0, 'M_h_v': 1.0} <==> {'M_h_c': 1.0, 'M_leu_L_v': 1.0}	R_LEUt6	0.001	R_L_leucine_transport_in_via_proton_antiport__vacuolar_	YJR001W	S_Transport__Vacuolar
{'M_leu_L_v': 1.0, 'M_h_v': 1.0} <==> {'M_leu_L_c': 1.0, 'M_h_c': 1.0}	R_LEUt7	0.001	R_L_leucine_transport_out_via_proton_symport__vacuolar	( YNL101W or YKL146W )	S_Transport__Vacuolar
{'M_o2_c': 3.0, 'M_h_c': 2.0, 'M_lanost_c': 1.0, 'M_nadh_c': 3.0} ---> {'M_h2o_c': 4.0, 'M_nad_c': 3.0, 'M_44mctr_c': 1.0, 'M_for_c': 1.0}	R_LNS14DMx	0.001	R_cytochrome_P450_lanosterol_14_alpha_demethylase__NAD_	( ( YNL111C and YHR007C and YKL150W ) or ( YIL043C and YNL111C and YHR007C ) )	S_Sterol_Metabolism
{'M_Ssq23epx_c': 1.0} <==> {'M_lanost_c': 1.0}	R_LNSTLS	0.001	R_lanosterol_synthase	YHR072W	S_Sterol_Metabolism
{'M_lac_L_e': 1.0, 'M_h_e': 1.0} <==> {'M_lac_L_c': 1.0, 'M_h_c': 1.0}	R_L_LACt2r	-0.001	R_L_lactate_reversible_transport_via_proton_symport	YKL217W	S_Transport__Extracellular
{'M_h_c': 1.0, 'M_man1p_c': 1.0, 'M_gtp_c': 1.0} <==> {'M_gdpmann_c': 1.0, 'M_ppi_c': 1.0}	R_MAN1PT	1615.8	R_mannose_1_phosphate_guanylyltransferase	YDL055C	S_Fructose_and_Mannose_Metabolism
{'M_man6p_c': 1.0} <==> {'M_f6p_c': 1.0}	R_MAN6PI	-0.001	R_mannose_6_phosphate_isomerase	YER003C	S_Fructose_and_Mannose_Metabolism
{'M_mannan_c': 1.0} <==> {'M_mannan_r': 1.0}	R_MANNANter	-1615.8	R_mannan_endoplasmic_reticulum_transport_via_diffusion		S_Transport__Endoplasmic_Reticular
{'M_man_e': 1.0, 'M_h_e': 1.0} <==> {'M_h_c': 1.0, 'M_man_c': 1.0}	R_MANt2	1615.8	R_D_mannose_transport_in_via_proton_symport	( YHR094C or YFL011W or YOL156W or YEL069C or YDL245C or YJR158W or YNR072W or YMR011W or YDR345C or YHR092C or YHR096C or YDR343C or YDR342C or YJL214W or YJL219W )	S_Transport__Extracellular
{'M_hcit_m': 1.0} <==> {'M_b124tc_m': 1.0, 'M_h2o_m': 1.0}	R_MCITDm	572.4	R_2_methylcitrate_dehydratase__mitochondrial		S_Threonine_and_Lysine_Metabolism
{'M_mal_L_c': 1.0, 'M_nad_c': 1.0} <==> {'M_h_c': 1.0, 'M_oaa_c': 1.0, 'M_nadh_c': 1.0}	R_MDH	9378.24	R_malate_dehydrogenase	YOL126C	S_Oxidative_Phosphorylation
{'M_5mdru1p_c': 1.0} <==> {'M_h2o_c': 1.0, 'M_dkmpp_c': 1.0}	R_MDRPD	572.195	R_5_Methylthio_5_deoxy_D_ribulose_1_phosphate_dehydratase		S_Methionine_Metabolism
{'M_h2o_c': 1.0, 'M_met_L_c': 1.0, 'M_atp_c': 1.0} <==> {'M_ppi_c': 1.0, 'M_pi_c': 1.0, 'M_amet_c': 1.0}	R_METAT	573.601	R_methionine_adenosyltransferase	( YDR502C or YLR180W )	S_Methionine_Metabolism
{'M_5mthf_c': 1.0, 'M_hcys_L_c': 1.0} <==> {'M_h_c': 1.0, 'M_met_L_c': 1.0, 'M_thf_c': 1.0}	R_METS	1.405	R_methionine_synthase	YER091C	S_Methionine_Metabolism
{'M_met_L_e': 1.0, 'M_h_e': 1.0} <==> {'M_h_c': 1.0, 'M_met_L_c': 1.0}	R_METt2r	101.401	R_L_methionine_reversible_transport_via_proton_symport	( YKR039W or YCL025C or YDR508C or YBR068C or YDR046C or YGR055W or YHL036W )	S_Transport__Extracellular
{'M_mev_R_c': 1.0, 'M_atp_c': 1.0} <==> {'M_h_c': 1.0, 'M_adp_c': 1.0, 'M_5pmev_c': 1.0}	R_MEVK1	0.015	R_mevalonate_kinase__atp_	YMR208W	S_Sterol_Metabolism
{'M_ctp_c': 1.0, 'M_mev_R_c': 1.0} <==> {'M_cdp_c': 1.0, 'M_h_c': 1.0, 'M_5pmev_c': 1.0}	R_MEVK2	0.001	R_mevalonate_kinase__ctp_	YMR208W	S_Sterol_Metabolism
{'M_mev_R_c': 1.0, 'M_gtp_c': 1.0} <==> {'M_h_c': 1.0, 'M_gdp_c': 1.0, 'M_5pmev_c': 1.0}	R_MEVK3	0.001	R_mevalonate_kinase__gtp_	YMR208W	S_Sterol_Metabolism
{'M_utp_c': 1.0, 'M_mev_R_c': 1.0} <==> {'M_udp_c': 1.0, 'M_h_c': 1.0, 'M_5pmev_c': 1.0}	R_MEVK4	0.001	R_mevalonate_kinase__utp_	YMR208W	S_Sterol_Metabolism
{'M_dhap_c': 1.0} <==> {'M_pi_c': 1.0, 'M_mthgxl_c': 1.0}	R_MGSA	0.001	R_methylglyoxal_synthase		S_Alternate_Carbon_Metabolism
{'M_h2o_c': 1.0, 'M_mi1p_D_c': 1.0} <==> {'M_pi_c': 1.0, 'M_inost_c': 1.0}	R_MI1PP	44.249	R_myo_inositol_1_phosphatase	YHR046C	S_Phospholipid_Biosynthesis
{'M_h2o_c': 1.0, 'M_3mob_c': 1.0, 'M_mlthf_c': 1.0} <==> {'M_2dhp_c': 1.0, 'M_thf_c': 1.0}	R_MOHMT	572.195	R_3_methyl_2_oxobutanoate_hydroxymethyltransferase	YBR176W	S_Pantothenate_and_CoA_Biosynthesis
{'M_pi_c': 1.0, 'M_5mta_c': 1.0} <==> {'M_ade_c': 1.0, 'M_5mdr1p_c': 1.0}	R_MTAP	572.195	R_5__methylthioadenosine_phosphorylase	YLR017W	S_Methionine_Metabolism
{'M_mlthf_c': 1.0, 'M_nadp_c': 1.0} <==> {'M_nadph_c': 1.0, 'M_methf_c': 1.0}	R_MTHFD	-0.001	R_methylenetetrahydrofolate_dehydrogenase__NADP_	YGR204W	S_Folate_Metabolism
{'M_mlthf_c': 1.0, 'M_nad_c': 1.0} <==> {'M_methf_c': 1.0, 'M_nadh_c': 1.0}	R_MTHFD2i	0.001	R_methylenetetrahydrofolate_dehydrogenase__NAD_	YKR080W	S_Folate_Metabolism
{'M_mlthf_c': 1.0, 'M_nadph_c': 1.0, 'M_h_c': 2.0} <==> {'M_5mthf_c': 1.0, 'M_nadp_c': 1.0}	R_MTHFR3	1.405	R_5_10_methylenetetrahydrofolatereductase__NADPH_	( YPL023C or YGL125W )	S_Folate_Metabolism
{'M_5mdr1p_c': 1.0} <==> {'M_5mdru1p_c': 1.0}	R_MTRI	572.195	R_5_methylthioribose_1_phosphate_isomerase		S_Methionine_Metabolism
{'M_nadh_m': 1.0, 'M_q6_m': 1.0, 'M_h_m': 1.0} <==> {'M_nad_m': 1.0, 'M_q6h2_m': 1.0}	R_NADH2_u6m	209.201	R_NADH_dehydrogenase__mitochondrial	( YML120C or YKL192C )	S_Oxidative_Phosphorylation
{'M_h2o_c': 1.0, 'M_nadp_c': 1.0} ---> {'M_pi_c': 1.0, 'M_nad_c': 1.0}	R_NADPPPS	0.002	R_NADP_phosphatase		S_NAD_Biosynthesis
{'M_nadp_c': 1.0} <==> {'M_nadp_e': 1.0}	R_NADPt	-0.002	R_NADP_transporter		S_Transport__Extracellular
{'M_h2o_c': 1.0, 'M_adp_c': 1.0} <==> {'M_pi_c': 1.0, 'M_h_c': 1.0, 'M_amp_c': 1.0}	R_NDP1	0.001	R_nucleoside_diphosphatase__ADP_	YER005W	S_Nucleotide_Salvage_Pathway
{'M_h2o_c': 1.0, 'M_gdp_c': 1.0} <==> {'M_gmp_c': 1.0, 'M_h_c': 1.0, 'M_pi_c': 1.0}	R_NDP3	0.415	R_nucleoside_diphosphatase__GDP_	YER005W	S_Nucleotide_Salvage_Pathway
{'M_h2o_c': 1.0, 'M_udp_c': 1.0} <==> {'M_pi_c': 1.0, 'M_h_c': 1.0, 'M_ump_c': 1.0}	R_NDP7	0.001	R_nucleoside_diphosphatase__UDP_	YER005W	S_Nucleotide_Salvage_Pathway
{'M_atp_c': 1.0, 'M_gdp_c': 1.0} <==> {'M_adp_c': 1.0, 'M_gtp_c': 1.0}	R_NDPK1	2101.95	R_nucleoside_diphosphate_kinase__ATPGDP_	YKL067W	S_Nucleotide_Salvage_Pathway
{'M_udp_c': 1.0, 'M_atp_c': 1.0} <==> {'M_utp_c': 1.0, 'M_adp_c': 1.0}	R_NDPK2	3396.01	R_nucleoside_diphosphate_kinase__ATPUDP_	YKL067W	S_Nucleotide_Salvage_Pathway
{'M_cdp_c': 1.0, 'M_atp_c': 1.0} <==> {'M_ctp_c': 1.0, 'M_adp_c': 1.0}	R_NDPK3	0.001	R_nucleoside_diphosphate_kinase__ATPCDP_	YKL067W	S_Nucleotide_Salvage_Pathway
{'M_atp_c': 1.0, 'M_dgdp_c': 1.0} <==> {'M_adp_c': 1.0, 'M_dgtp_c': 1.0}	R_NDPK5	-4.8	R_nucleoside_diphosphate_kinase__ATPdGDP_	YKL067W	S_Nucleotide_Salvage_Pathway
{'M_idp_c': 1.0, 'M_atp_c': 1.0} <==> {'M_itp_c': 1.0, 'M_adp_c': 1.0}	R_NDPK9	21017.6	R_nucleoside_diphosphate_kinase__ATPIDP_	YKL067W	S_Nucleotide_Salvage_Pathway
{'M_nh4_e': 1.0} <==> {'M_nh4_c': 1.0}	R_NH4t	992.82	R_ammonia_reversible_transport	( YGR121C or YNL142W or YPR138C )	S_Transport__Extracellular
{'M_nh4_c': 1.0} <==> {'M_nh4_e': 1.0}	R_NH4ti	0.001	R_ammonia_transport__efflux__cytosol_to_extracellular_	YDR384C	S_Transport__Extracellular
{'M_o2_e': 1.0} <==> {'M_o2_c': 1.0}	R_O2t	965.818	R_o2_transport__diffusion_		S_Transport__Extracellular
{'M_o2_c': 1.0} <==> {'M_o2_r': 1.0}	R_O2ter	0.001	R_O2__transport__endoplasmic_reticulum		S_Transport__Endoplasmic_Reticular
{'M_o2_c': 1.0} <==> {'M_o2_m': 1.0}	R_O2tm	390.806	R_O2_transport__diffusion_		S_Transport__Mitochondrial
{'M_cbp_c': 1.0, 'M_orn_c': 1.0} <==> {'M_h_c': 1.0, 'M_citr_L_c': 1.0, 'M_pi_c': 1.0}	R_OCBTi	8898.88	R_ornithine_carbamoyltransferase__irreversible	YJL088W	S_Arginine_and_Proline_Metabolism
{'M_ocdca_e': 1.0} ---> {'M_ocdca_c': 1.0}	R_OCDCAt	5.6	R_Octadecanoate__n_C180__transport_in_via_uniport		S_Transport__Extracellular
{'M_ocdcea_e': 1.0} ---> {'M_ocdcea_c': 1.0}	R_OCDCEAt	26.8786	R_Octadecenoate__n_C181__transport_in_via_uniport		S_Transport__Extracellular
{'M_ocdcya_e': 1.0} ---> {'M_ocdcya_c': 1.0}	R_OCDCYAt	10.0795	R_Octadecynoate__n_C182__transport_in_via_uniport		S_Transport__Extracellular
{'M_accoa_c': 1.0, 'M_etoh_c': 1.0} <==> {'M_aces_c': 1.0, 'M_coa_c': 1.0}	R_OHACT1	0.001	R_Alcohol_Acetyltransferase__ethanol_	( YOR377W or YGR177C )	S_Complex_Alcohol_Metabolism
{'M_accoa_c': 1.0, 'M_iamoh_c': 1.0} <==> {'M_iamac_c': 1.0, 'M_coa_c': 1.0}	R_OHACT2	0.00099997	R_Alcohol_Acetyltransferase__isoamyl_alcohol_	( YOR377W or YGR177C )	S_Complex_Alcohol_Metabolism
{'M_accoa_c': 1.0, 'M_2mbtoh_c': 1.0} <==> {'M_2mbac_c': 1.0, 'M_coa_c': 1.0}	R_OHACT3	0.002	R_Alcohol_Acetyltransferase__2_methylbutanol_	( YOR377W or YGR177C )	S_Complex_Alcohol_Metabolism
{'M_accoa_c': 1.0, 'M_ibutoh_c': 1.0} <==> {'M_ibutac_c': 1.0, 'M_coa_c': 1.0}	R_OHACT4	0.001	R_Alcohol_Acetyltransferase__isobutyl_alcohol_	( YOR377W or YGR177C )	S_Complex_Alcohol_Metabolism
{'M_accoa_c': 1.0, 'M_2phetoh_c': 1.0} <==> {'M_pheac_c': 1.0, 'M_coa_c': 1.0}	R_OHACT5	7998.54	R_Alcohol_Acetyltransferase__Phenylethanol_alcohol_	( YOR377W or YGR177C )	S_Complex_Alcohol_Metabolism
{'M_h_c': 1.0, 'M_orot5p_c': 1.0} <==> {'M_co2_c': 1.0, 'M_ump_c': 1.0}	R_OMPDC	209.201	R_orotidine_5__phosphate_decarboxylase	YEL021W	S_Purine_and_Pyrimidine_Biosynthesis
{'M_h_c': 1.0, 'M_orn_c': 1.0} <==> {'M_co2_c': 1.0, 'M_ptrc_c': 1.0}	R_ORNDC	0.001	R_Ornithine_Decarboxylase	YKL184W	S_Arginine_and_Proline_Metabolism
{'M_akg_c': 1.0, 'M_orn_c': 1.0} ---> {'M_glu_L_c': 1.0, 'M_glu5sa_c': 1.0}	R_ORNTA	6937.94	R_ornithine_transaminase	YLR438W	S_Arginine_and_Proline_Metabolism
{'M_ppi_c': 1.0, 'M_orot5p_c': 1.0} <==> {'M_orot_c': 1.0, 'M_prpp_c': 1.0}	R_ORPT	-209.201	R_orotate_phosphoribosyltransferase	( YML106W or YMR271C )	S_Purine_and_Pyrimidine_Biosynthesis
{'M_h_m': 1.0, 'M_oxag_m': 1.0} <==> {'M_2oxoadp_m': 1.0, 'M_co2_m': 1.0}	R_OXAGm	572.4	R_non_enzymatic_reaction		S_Threonine_and_Lysine_Metabolism
{'M_1pyr5c_c': 1.0, 'M_h_c': 2.0, 'M_nadph_c': 1.0} <==> {'M_nadp_c': 1.0, 'M_pro_L_c': 1.0}	R_P5CR	6937.94	R_pyrroline_5_carboxylate_reductase	YER023W	S_Arginine_and_Proline_Metabolism
{'M_ala_B_c': 1.0, 'M_pant_R_c': 1.0, 'M_atp_c': 1.0} <==> {'M_ppi_c': 1.0, 'M_pnto_R_c': 1.0, 'M_h_c': 1.0, 'M_amp_c': 1.0}	R_PANTS	572.195	R_pantothenate_synthase	YIL145C	S_Pantothenate_and_CoA_Biosynthesis
{'M_pant_R_c': 1.0} <==> {'M_pant_R_m': 1.0}	R_PANTtm	-572.195	R_pantothenate_mitochondrial_transport		S_Transport__Mitochondrial
{'M_pap_e': 1.0} <==> {'M_pap_c': 1.0}	R_PAPt	771.591	R_PAP_reversible_uniport		S_Transport__Extracellular
{'M_pyr_c': 1.0, 'M_atp_c': 1.0, 'M_hco3_c': 1.0} ---> {'M_oaa_c': 1.0, 'M_h_c': 1.0, 'M_adp_c': 1.0, 'M_pi_c': 1.0}	R_PC	1390.4	R_pyruvate_carboxylase	( YGL062W or YBR218C )	S_Anaplerotic_reactions
{'M_h2o_c': 1.0, 'M_camp_c': 1.0} <==> {'M_h_c': 1.0, 'M_amp_c': 1.0}	R_PDE1	0.001	R_3__5__cyclic_nucleotide_phosphodiesterase	( YOR360C or YGL248W )	S_Purine_and_Pyrimidine_Biosynthesis
{'M_pendp_c': 1.0} <==> {'M_pendp_m': 1.0}	R_PENDPtm	0.002	R_all_trans_Pentaprenyl_diphosphate_transport__mitochondrial		S_Transport__Mitochondrial
{'M_ctp_c': 1.0, 'M_h_c': 1.0, 'M_ethamp_c': 1.0} <==> {'M_ppi_c': 1.0, 'M_cdpea_c': 1.0}	R_PETHCT	8.9	R_phosphoethanolamine_cytidyltransferase	YGR007W	S_Phospholipid_Biosynthesis
{'M_pe_SC_c': 1.0} <==> {'M_pe_SC_m': 1.0}	R_PEtm_SC	-0.001	R_phosphatidylethanolamine_mitochondrial_transport__yeast_specific		S_Transport__Mitochondrial
{'M_atp_c': 1.0, 'M_f6p_c': 1.0} <==> {'M_h_c': 1.0, 'M_adp_c': 1.0, 'M_f26bp_c': 1.0}	R_PFK26	0.001	R_6_phosphofructo_2_kinase	( YIL107C or YOL136C )	S_Fructose_and_Mannose_Metabolism
{'M_atp_c': 1.0, 'M_s7p_c': 1.0} <==> {'M_s17bp_c': 1.0, 'M_h_c': 1.0, 'M_adp_c': 1.0}	R_PFK_3	102815	R_phosphofructokinase__s7p_	( YGR240C and YMR205C )	S_GlycolysisGluconeogenesis
{'M_nad_c': 1.0, 'M_3pg_c': 1.0} <==> {'M_h_c': 1.0, 'M_nadh_c': 1.0, 'M_3php_c': 1.0}	R_PGCD	955.103	R_phosphoglycerate_dehydrogenase	( YER081W or YIL074C )	S_Glycine_and_Serine_Metabolism
{'M_atp_c': 1.0, 'M_3pg_c': 1.0} <==> {'M_13dpg_c': 1.0, 'M_adp_c': 1.0}	R_PGK	-204936	R_phosphoglycerate_kinase	YCR012W	S_GlycolysisGluconeogenesis
{'M_h2o_c': 1.0, 'M_6pgl_c': 1.0} <==> {'M_h_c': 1.0, 'M_6pgc_c': 1.0}	R_PGL	1.401	R_6_phosphogluconolactonase	( YNR034W or YHR163W or YGR248W or YCR073W-A )	S_Pentose_Phosphate_Pathway
{'M_2pg_c': 1.0} <==> {'M_3pg_c': 1.0}	R_PGM	-203981	R_phosphoglycerate_mutase	( YKL152C or YDL021W or YOL056W )	S_GlycolysisGluconeogenesis
{'M_g1p_c': 1.0} <==> {'M_g6p_c': 1.0}	R_PGMT	-3306.6	R_phosphoglucomutase	( YKL127W or YMR105C )	S_Pentose_Phosphate_Pathway
{'M_pheac_c': 1.0} <==> {'M_pheac_e': 1.0}	R_PHEACt	7998.54	R_Phenethyl_acetate_transport__extracellular_		S_Transport__Extracellular
{'M_akg_c': 1.0, 'M_phe_L_c': 1.0} <==> {'M_glu_L_c': 1.0, 'M_phpyr_c': 1.0}	R_PHETA1	7998.54	R_phenylalanine_transaminase	( YHR137W or YGL202W )	S_Tyrosine__Tryptophan__and_Phenylalanine_Metabolism
{'M_h_e': 1.0, 'M_phe_L_e': 1.0} <==> {'M_h_c': 1.0, 'M_phe_L_c': 1.0}	R_PHEt2r	8266.34	R_L_phenylalanine_reversible_transport_via_proton_symport	( YKR039W or YCL025C or YOL020W or YBR068C or YDR046C )	S_Transport__Extracellular
{'M_cdpdag_SC_c': 0.01, 'M_inost_c': 1.0} <==> {'M_h_c': 1.0, 'M_ptd1ino_SC_c': 0.01, 'M_cmp_c': 1.0}	R_PINOS_SC	54.849	R_phosphatidylinositol_synthase__yeast_specific	YPR113W	S_Phospholipid_Biosynthesis
{'M_pi_c': 1.0, 'M_h_c': 1.0} <==> {'M_h_m': 1.0, 'M_pi_m': 1.0}	R_PIt2m	1308.66	R_phosphate_transporter__mitochondrial	YJR077C	S_Transport__Mitochondrial
{'M_h_e': 1.0, 'M_pi_e': 1.0} <==> {'M_pi_c': 1.0, 'M_h_c': 1.0}	R_PIt2r	-1147.77	R_phosphate_reversible_transport_via_symport	( YML123C or YCR037C or YBR296C or YJL198W or YNR013C )	S_Transport__Extracellular
{'M_ptd1ino_SC_e': 0.0050000000000000001, 'M_h2o_e': 1.0} <==> {'M_g3pi_e': 0.5, 'M_ocdcya_e': 0.089999999999999997, 'M_dca_e': 0.02, 'M_ocdcea_e': 0.23999999999999999, 'M_ttdca_e': 0.10000000000000001, 'M_hdcea_e': 0.17000000000000001, 'M_ocdca_e': 0.050000000000000003, 'M_ddca_e': 0.059999999999999998, 'M_hdca_e': 0.27000000000000002, 'M_h_e': 1.0}	R_PLBP1I_SCe	111.994	R_phospholipase_B__phosphatidylinositol___yeast_specific__extracellular_	( YMR008C or YMR006C or YOL011W )	S_Phospholipid_Metabolism
{'M_h2o_c': 1.0, 'M_pc_SC_c': 0.01} ---> {'M_h_c': 1.0, 'M_pa_SC_c': 0.01, 'M_chol_c': 1.0}	R_PLD_SC	10.149	R_phospholipase_D__yeast_specific	YKR031C	S_Phospholipid_Metabolism
{'M_man1p_c': 1.0} <==> {'M_man6p_c': 1.0}	R_PMANM	-1615.8	R_phosphomannomutase	YFL045C	S_Fructose_and_Mannose_Metabolism
{'M_h2o_c': 1.0, 'M_5aprbu_c': 1.0} <==> {'M_pi_c': 1.0, 'M_4r5au_c': 1.0}	R_PMDPHT	1.982	R_pyrimidine_phosphatase		S_Riboflavin_Metabolism
{'M_atp_c': 1.0, 'M_5pmev_c': 1.0} <==> {'M_5dpmev_c': 1.0, 'M_adp_c': 1.0}	R_PMEVK	0.018	R_phosphomevalonate_kinase	YMR220W	S_Sterol_Metabolism
{'M_pnto_R_c': 1.0, 'M_atp_c': 1.0} <==> {'M_h_c': 1.0, 'M_adp_c': 1.0, 'M_4ppan_c': 1.0}	R_PNTK	0.00200001	R_pantothenate_kinase	YDR531W	S_Pantothenate_and_CoA_Biosynthesis
{'M_pnto_R_e': 1.0, 'M_h_e': 1.0} <==> {'M_pnto_R_c': 1.0, 'M_h_c': 1.0}	R_PNTOt2	-572.193	R_Pantothenate_reversible_transport_via_proton_symport	YCR028C	S_Transport__Extracellular
{'M_h2o_c': 1.0, 'M_o2_c': 1.0, 'M_sprm_c': 1.0} ---> {'M_aproa_c': 1.0, 'M_spmd_c': 1.0, 'M_h2o2_c': 1.0}	R_POLYAO3	572.195	R_poylamine_oxidase	YMR020W	S_Pantothenate_and_CoA_Biosynthesis
{'M_h2o_c': 1.0, 'M_ppi_c': 1.0} ---> {'M_pi_c': 2.0, 'M_h_c': 1.0}	R_PPA	26024.2	R_inorganic_diphosphatase	YBR011C	S_Oxidative_Phosphorylation
{'M_ppi_m': 1.0, 'M_h2o_m': 1.0} <==> {'M_h_m': 1.0, 'M_pi_m': 2.0}	R_PPAm	0.006	R_inorganic_diphosphatase	YMR267W	S_Oxidative_Phosphorylation
{'M_5aop_c': 2.0} <==> {'M_h2o_c': 2.0, 'M_h_c': 1.0, 'M_ppbng_c': 1.0}	R_PPBNGS	0.008	R_porphobilinogen_synthase	YGL040C	S_Porphyrin_and_Chlorophyll_Metabolism
{'M_h_c': 1.0, 'M_4ppcys_c': 1.0} <==> {'M_co2_c': 1.0, 'M_pan4p_c': 1.0}	R_PPCDC	0.00200001	R_phosphopantothenoylcysteine_decarboxylase		S_Pantothenate_and_CoA_Biosynthesis
{'M_r1p_c': 1.0} <==> {'M_r5p_c': 1.0}	R_PPM	1.406	R_phosphopentomutase	( YKL127W or YMR105C )	S_Pentose_Phosphate_Pathway
{'M_ctp_c': 1.0, 'M_cys_L_c': 1.0, 'M_4ppan_c': 1.0} <==> {'M_ppi_c': 1.0, 'M_h_c': 1.0, 'M_cmp_c': 1.0, 'M_4ppcys_c': 1.0}	R_PPNCL2	0.00200001	R_phosphopantothenate_cysteine_ligase		S_Pantothenate_and_CoA_Biosynthesis
{'M_pphn_c': 1.0, 'M_nadp_c': 1.0} ---> {'M_co2_c': 1.0, 'M_nadph_c': 1.0, 'M_34hpp_c': 1.0}	R_PPND2	571.994	R_prephenate_dehydrogenase__NADP_	YBR166C	S_Tyrosine__Tryptophan__and_Phenylalanine_Metabolism
{'M_pppg9_c': 1.0} <==> {'M_pppg9_m': 1.0}	R_PPPG9tm	0.002	R_protoporphyrinogen_IX_mitochondrial_transport		S_Transport__Mitochondrial
{'M_o2_m': 3.0, 'M_pppg9_m': 2.0} <==> {'M_ppp9_m': 2.0, 'M_h2o_m': 6.0}	R_PPPGOm	0.001	R_protoporphyrinogen_oxidase__mitochondrial	YER014W	S_Porphyrin_and_Chlorophyll_Metabolism
{'M_ipdp_m': 1.0, 'M_pendp_m': 1.0} <==> {'M_ppi_m': 1.0, 'M_hexdp_m': 1.0}	R_PPTTm	0.002	R_trans_pentaprenyltranstransferase__mitochondrial	YBR003W	S_Quinone_Biosynthesis
{'M_h_c': 1.0, 'M_phpyr_c': 1.0} <==> {'M_co2_c': 1.0, 'M_pacald_c': 1.0}	R_PPYRDC	7998.54	R_Phenylpyruvate_decarboxylase	( YLR044C or YLR134W or YGR087C or YDR380W )	S_Complex_Alcohol_Metabolism
{'M_h2o_c': 1.0, 'M_prbamp_c': 1.0} <==> {'M_prfp_c': 1.0}	R_PRAMPC	578.144	R_phosphoribosyl_AMP_cyclohydrolase	YCL030C	S_Histidine_Metabolism
{'M_h2o_c': 1.0, 'M_prbatp_c': 1.0} <==> {'M_ppi_c': 1.0, 'M_h_c': 1.0, 'M_prbamp_c': 1.0}	R_PRATPP	578.144	R_phosphoribosyl_ATP_pyrophosphatase	YCL030C	S_Histidine_Metabolism
{'M_prfp_c': 1.0} <==> {'M_prlp_c': 1.0}	R_PRMICIi	578.144	R_1__5_phosphoribosyl__5__5_phosphoribosylamino_methylideneamino_imidazole_4_carboxamide_isomerase__irreversible_	YIL020C	S_Histidine_Metabolism
{'M_pro_L_e': 1.0, 'M_h_e': 1.0} <==> {'M_h_c': 1.0, 'M_pro_L_c': 1.0}	R_PROt2r	-6608.54	R_L_proline_reversible_transport_via_proton_symport	( YKR039W or YOR348C )	S_Transport__Extracellular
{'M_r5p_c': 1.0, 'M_atp_c': 1.0} <==> {'M_prpp_c': 1.0, 'M_h_c': 1.0, 'M_amp_c': 1.0}	R_PRPPS	787.346	R_phosphoribosylpyrophosphate_synthetase	( YER099C or YOL061W or YBL068W or YHL011C or YKL181W )	S_Histidine_Metabolism
{'M_pep_c': 1.0, 'M_skm5p_c': 1.0} <==> {'M_3psme_c': 1.0, 'M_pi_c': 1.0}	R_PSCVTi	571.996	R_3_phosphoshikimate_1_carboxyvinyltransferase__irreversible	YDR127W	S_Tyrosine__Tryptophan__and_Phenylalanine_Metabolism
{'M_ps_SC_m': 0.01, 'M_h_m': 1.0} <==> {'M_pe_SC_m': 0.01, 'M_co2_m': 1.0}	R_PSERDm_SC	0.1	R_phosphatidylserine_decarboxylase__yeast_specific__mitochondrial	YNL169C	S_Phospholipid_Biosynthesis
{'M_ser_L_c': 1.0, 'M_cdpdag_SC_c': 0.01} <==> {'M_h_c': 1.0, 'M_cmp_c': 1.0, 'M_ps_SC_c': 0.01}	R_PSERS_SC	3.5	R_phosphatidylserine_synthase__yeast_specific	YER026C	S_Phospholipid_Biosynthesis
{'M_glu_L_c': 1.0, 'M_3php_c': 1.0} <==> {'M_akg_c': 1.0, 'M_pser_L_c': 1.0}	R_PSERT	955.103	R_phosphoserine_transaminase	YOR184W	S_Glycine_and_Serine_Metabolism
{'M_h2o_c': 1.0, 'M_pser_L_c': 1.0} <==> {'M_ser_L_c': 1.0, 'M_pi_c': 1.0}	R_PSP_L	955.103	R_phosphoserine_phosphatase__L_serine_	YGR208W	S_Glycine_and_Serine_Metabolism
{'M_ps_SC_c': 1.0} <==> {'M_ps_SC_m': 1.0}	R_PStm_SC	0.001	R_phosphatidylserine_mitochondrial__transport__yeast_specific		S_Transport__Mitochondrial
{'M_h_c': 1.0, 'M_atp_c': 1.0, 'M_pan4p_c': 1.0} <==> {'M_ppi_c': 1.0, 'M_dpcoa_c': 1.0}	R_PTPATi	0.00200001	R_pantetheine_phosphate_adenylyltransferase		S_Pantothenate_and_CoA_Biosynthesis
{'M_ptrc_c': 1.0} <==> {'M_ptrc_e': 1.0}	R_PTRCtex2	0.001	R_putrescine_excretion__cytosol_to_extracellular_	YKL174C	S_Transport__Extracellular
{'M_pi_c': 1.0, 'M_ins_c': 1.0} <==> {'M_hxan_c': 1.0, 'M_r1p_c': 1.0}	R_PUNP5	1.406	R_purine_nucleoside_phosphorylase__Inosine_	YLR209C	S_Nucleotide_Salvage_Pathway
{'M_din_c': 1.0, 'M_pi_c': 1.0} <==> {'M_hxan_c': 1.0, 'M_2dr1p_c': 1.0}	R_PUNP6	11.998	R_purine_nucleoside_phosphorylase__Deoxyinosine_	YLR209C	S_Nucleotide_Salvage_Pathway
{'M_pep_c': 1.0, 'M_h_c': 1.0, 'M_adp_c': 1.0} ---> {'M_pyr_c': 1.0, 'M_atp_c': 1.0}	R_PYK	202837	R_pyruvate_kinase	( YAL038W or YOR347C )	S_GlycolysisGluconeogenesis
{'M_pyr_c': 1.0, 'M_h_c': 1.0} <==> {'M_co2_c': 1.0, 'M_acald_c': 1.0}	R_PYRDC	0.001	R_pyruvate_decarboxylase	( YGR087C or YLR134W or YLR044C )	S_Pyruvate_Metabolism
{'M_pyr_c': 1.0, 'M_h_c': 1.0, 'M_acald_c': 1.0} <==> {'M_co2_c': 1.0, 'M_actn_R_c': 1.0}	R_PYRDC2	0.001	R_pyruvate_decarboxylase__acetoin_forming_	( YLR044C or YGR087C or YLR134W )	S_Pyruvate_Metabolism
{'M_pyr_c': 1.0} ---> {'M_pyr_e': 1.0}	R_PYRt	200529	R_Pyruvate_exchange__diffusion		S_Transport__Extracellular
{'M_pyr_c': 1.0, 'M_h_c': 1.0} <==> {'M_h_m': 1.0, 'M_pyr_m': 1.0}	R_PYRt2m	0.406	R_pyruvate_mitochondrial_transport_via_proton_symport		S_Transport__Mitochondrial
{'M_atp_c': 1.0, 'M_ribflv_c': 1.0} <==> {'M_h_c': 1.0, 'M_adp_c': 1.0, 'M_fmn_c': 1.0}	R_RBFK	0.002	R_riboflavin_kinase	YDR236C	S_Riboflavin_Metabolism
{'M_db4p_c': 1.0, 'M_4r5au_c': 1.0} <==> {'M_h2o_c': 2.0, 'M_pi_c': 1.0, 'M_dmlz_c': 1.0}	R_RBFSa	3.964	R_riboflavin_synthase	YOL143C	S_Riboflavin_Metabolism
{'M_dmlz_c': 2.0} <==> {'M_ribflv_c': 1.0, 'M_4r5au_c': 1.0}	R_RBFSb	1.982	R_riboflavin_synthase	YBR256C	S_Riboflavin_Metabolism
{'M_trdrd_c': 1.0, 'M_atp_c': 1.0} <==> {'M_h2o_c': 1.0, 'M_trdox_c': 1.0, 'M_datp_c': 1.0}	R_RNTR1	7.2	R_ribonucleoside_triphosphate_reductase__ATP_	( YLR043C or YGR209C )	S_Nucleotide_Salvage_Pathway
{'M_trdrd_c': 1.0, 'M_gtp_c': 1.0} <==> {'M_h2o_c': 1.0, 'M_trdox_c': 1.0, 'M_dgtp_c': 1.0}	R_RNTR2	4.8	R_ribonucleoside_triphosphate_reductase__GTP_	( YLR043C or YGR209C )	S_Nucleotide_Salvage_Pathway
{'M_ctp_c': 1.0, 'M_trdrd_c': 1.0} <==> {'M_h2o_c': 1.0, 'M_dctp_c': 1.0, 'M_trdox_c': 1.0}	R_RNTR3	0.001	R_ribonucleoside_triphosphate_reductase__CTP_	( YGR209C or YLR043C )	S_Nucleotide_Salvage_Pathway
{'M_utp_c': 1.0, 'M_trdrd_c': 1.0} <==> {'M_h2o_c': 1.0, 'M_dutp_c': 1.0, 'M_trdox_c': 1.0}	R_RNTR4	0.001	R_ribonucleoside_triphosphate_reductase__UTP_	( YLR043C or YGR209C )	S_Nucleotide_Salvage_Pathway
{'M_ru5p_D_c': 1.0} <==> {'M_xu5p_D_c': 1.0}	R_RPE	-716.334	R_ribulose_5_phosphate_3_epimerase	YJL121C	S_Pentose_Phosphate_Pathway
{'M_r5p_c': 1.0} <==> {'M_ru5p_D_c': 1.0}	R_RPI	-713.771	R_ribose_5_phosphate_isomerase	YOR095C	S_Pentose_Phosphate_Pathway
{'M_glu_L_c': 1.0, 'M_L2aadp6sa_c': 1.0, 'M_nadph_c': 1.0, 'M_h_c': 1.0} <==> {'M_h2o_c': 1.0, 'M_nadp_c': 1.0, 'M_saccrp_L_c': 1.0}	R_SACCD1	572.4	R_saccharopine_dehydrogenase__NADP__L_glutamate_forming_	YNR050C	S_Threonine_and_Lysine_Metabolism
{'M_h2o_c': 1.0, 'M_nad_c': 1.0, 'M_saccrp_L_c': 1.0} <==> {'M_akg_c': 1.0, 'M_h_c': 1.0, 'M_lys_L_c': 1.0, 'M_nadh_c': 1.0}	R_SACCD2	572.4	R_saccharopine_dehydrogenase__NAD__L_lysine_forming_	YIR034C	S_Threonine_and_Lysine_Metabolism
{'M_zymst_c': 1.0, 'M_amet_c': 1.0} <==> {'M_h_c': 1.0, 'M_fecost_c': 1.0, 'M_ahcys_c': 1.0}	R_SAM24MT	1.4	R_S_adenosyl_methionine_delta_24_sterol_c_methyltransferase	YML008C	S_Sterol_Metabolism
{'M_ser_L_c': 1.0} <==> {'M_pyr_c': 1.0, 'M_nh4_c': 1.0}	R_SERD_L	0.001	R_L_serine_deaminase	( YCL064C or YIL168W )	S_Glycine_and_Serine_Metabolism
{'M_nadph_c': 1.0, 'M_h_c': 1.0, 'M_3dhsk_c': 1.0} <==> {'M_nadp_c': 1.0, 'M_skm_c': 1.0}	R_SHK3D	571.996	R_shikimate_dehydrogenase	YDR127W	S_Tyrosine__Tryptophan__and_Phenylalanine_Metabolism
{'M_atp_c': 1.0, 'M_skm_c': 1.0} <==> {'M_skm5p_c': 1.0, 'M_h_c': 1.0, 'M_adp_c': 1.0}	R_SHKK	571.996	R_shikimate_kinase	YDR127W	S_Tyrosine__Tryptophan__and_Phenylalanine_Metabolism
{'M_so4_e': 1.0} <==> {'M_so4_c': 1.0}	R_SO4ti	40	R_sulfate_irreversible_uniport	( YBR294W or YLR092W or YGR125W )	S_Transport__Extracellular
{'M_spmd_e': 1.0, 'M_h_c': 1.0} ---> {'M_spmd_c': 1.0, 'M_h_e': 1.0}	R_SPMDt3i	188411	R_spermidine_transport_in_via_proton_antiport	( YOR273C or YLL028W )	S_Transport__Extracellular
{'M_spmd_c': 1.0} <==> {'M_spmd_e': 1.0}	R_SPMDtex2	188411	R_spermidine_excretion__cytosol_to_extracellular_	YKL174C	S_Transport__Extracellular
{'M_ametam_c': 1.0, 'M_spmd_c': 1.0} <==> {'M_h_c': 1.0, 'M_sprm_c': 1.0, 'M_5mta_c': 1.0}	R_SPRMS	572.195	R_spermine_synthase	YLR146C	S_Arginine_and_Proline_Metabolism
{'M_Ssq23epx_r': 1.0} <==> {'M_Ssq23epx_c': 1.0}	R_SQ23EPXter	0.001	R_Squalene_2_3_epoxide_endoplamic_reticular_transport		S_Transport__Endoplasmic_Reticular
{'M_h_r': 1.0, 'M_nadph_r': 1.0, 'M_sql_r': 1.0, 'M_o2_r': 1.0} <==> {'M_Ssq23epx_r': 1.0, 'M_h2o_r': 1.0, 'M_nadp_r': 1.0}	R_SQLEr	0.001	R_Squalene_epoxidase__endoplasmic_reticular__NADP_	( YGR175C and YHR042W )	S_Sterol_Metabolism
{'M_frdp_c': 2.0, 'M_h_c': 1.0, 'M_nadph_c': 1.0} <==> {'M_ppi_c': 2.0, 'M_nadp_c': 1.0, 'M_sql_c': 1.0}	R_SQLS	0.001	R_Squalene_synthase	YHR190W	S_Sterol_Metabolism
{'M_sql_c': 1.0} <==> {'M_sql_r': 1.0}	R_SQLter	0.001	R_squalene_endoplamic_reticular_transport		S_Transport__Endoplasmic_Reticular
{'M_succ_c': 1.0, 'M_pi_m': 1.0} ---> {'M_pi_c': 1.0, 'M_succ_m': 1.0}	R_SUCCtm	572.4	R_succinate_transport__mitochondrial	YLR348C	S_Transport__Mitochondrial
{'M_succ_m': 1.0, 'M_q6_m': 1.0} <==> {'M_q6h2_m': 1.0, 'M_fum_m': 1.0}	R_SUCD2_u6m	572.4	R_succinate_dehydrogenase__ubiquinone_6___mitochondrial	( ( YDR178W and YKL141W and YKL148C and YLL041C ) or ( YKL141W and YKL148C and YLL041C and YLR164W ) or ( YDR178W and YKL148C and YLL041C and YMR118C ) or ( YDR178W and YJL045W and YKL141W and YLL041C ) )	S_Citric_Acid_Cycle
{'M_h2o_c': 1.0, 'M_triglyc_SC_c': 0.01} <==> {'M_ttdca_c': 0.10000000000000001, 'M_ocdcea_c': 0.23999999999999999, 'M_dca_c': 0.02, 'M_ocdcya_c': 0.089999999999999997, 'M_ocdca_c': 0.050000000000000003, 'M_hdcea_c': 0.17000000000000001, 'M_hdca_c': 0.27000000000000002, 'M_h_c': 1.0, 'M_ddca_c': 0.059999999999999998, 'M_12dgr_SC_c': 0.01}	R_TAGL_SC	0.05	R_Triacylglycerol_lipase__yeast_specific	( YDR058C or YMR313C )	S_Glycerolipid_Metabolism
{'M_s7p_c': 1.0, 'M_g3p_c': 1.0} <==> {'M_e4p_c': 1.0, 'M_f6p_c': 1.0}	R_TALA	-102887	R_transaldolase	( YLR354C or YGR043C )	S_Pentose_Phosphate_Pathway
{'M_trdrd_c': 1.0, 'M_h2o2_c': 1.0} ---> {'M_h2o_c': 2.0, 'M_trdox_c': 1.0}	R_THIORDXi	572.195	R_hydrogen_peroxide_reductase__thioredoxin_	( ( YLR043C and YDR453C ) or ( YGR209C and YDR453C ) )	S_Other
{'M_thmpp_e': 1.0, 'M_h2o_e': 2.0} <==> {'M_h_e': 1.0, 'M_thm_e': 1.0, 'M_pi_e': 2.0}	R_THMDPe	0.001	R_thiamin_diphosphatase__extracellular	YBR092C	S_Thiamine_Metabolism
{'M_h2o_e': 1.0, 'M_thmmp_e': 1.0} <==> {'M_thm_e': 1.0, 'M_pi_e': 1.0}	R_THMPe	0.002	R_thiamin_phosphatase__extracellular	YBR092C	S_Thiamine_Metabolism
{'M_h_e': 1.0, 'M_thm_e': 1.0} ---> {'M_thm_c': 1.0, 'M_h_c': 1.0}	R_THMt2	0.002	R_Thiamine_transport_in_via_proton_symport	( YLR237W or YOR071C or YOR192C )	S_Transport__Extracellular
{'M_thr_L_c': 1.0} <==> {'M_2obut_c': 1.0, 'M_nh4_c': 1.0}	R_THRD_L	0.002	R_L_threonine_deaminase	( YCL064C or YKL218C )	S_Threonine_and_Lysine_Metabolism
{'M_h2o_c': 1.0, 'M_phom_c': 1.0} <==> {'M_thr_L_c': 1.0, 'M_pi_c': 1.0}	R_THRS	382.802	R_threonine_synthase	YCR053W	S_Threonine_and_Lysine_Metabolism
{'M_r5p_c': 1.0, 'M_xu5p_D_c': 1.0} <==> {'M_s7p_c': 1.0, 'M_g3p_c': 1.0}	R_TKT1	-72.169	R_transketolase	( YBR117C or YPR074C )	S_Pentose_Phosphate_Pathway
{'M_e4p_c': 1.0, 'M_xu5p_D_c': 1.0} <==> {'M_f6p_c': 1.0, 'M_g3p_c': 1.0}	R_TKT2	-644.165	R_transketolase	( YPR074C or YBR117C )	S_Pentose_Phosphate_Pathway
{'M_thm_c': 1.0, 'M_atp_c': 1.0} ---> {'M_h_c': 1.0, 'M_thmpp_c': 1.0, 'M_amp_c': 1.0}	R_TMDPK	0.002	R_thiamine_diphosphokinase	YOR143C	S_Thiamine_Metabolism
{'M_atp_c': 1.0, 'M_thmpp_c': 1.0} <==> {'M_thmtp_c': 1.0, 'M_adp_c': 1.0}	R_TMDPPK	0.002	R_thiamine_diphosphate_kinase	YOR143C	S_Thiamine_Metabolism
{'M_dump_c': 1.0, 'M_mlthf_c': 1.0} <==> {'M_dtmp_c': 1.0, 'M_dhf_c': 1.0}	R_TMDS	7.2	R_thymidylate_synthase	YOR074C	S_Purine_and_Pyrimidine_Biosynthesis
{'M_dhap_c': 1.0} <==> {'M_g3p_c': 1.0}	R_TPI	102766	R_triose_phosphate_isomerase	YDR050C	S_GlycolysisGluconeogenesis
{'M_nadph_c': 1.0, 'M_h_c': 1.0, 'M_trdox_c': 1.0} <==> {'M_trdrd_c': 1.0, 'M_nadp_c': 1.0}	R_TRDR	584.197	R_thioredoxin_reductase__NADPH_	( ( YDR353W and YDR353W ) or YLR043C or ( YDR353W and YGR209C ) )	S_Purine_and_Pyrimidine_Biosynthesis
{'M_h2o_v': 1.0, 'M_tre_v': 1.0} <==> {'M_glc_D_v': 2.0}	R_TREHv	0.00999999	R_alpha_alpha_trehalase__vacuolar_	YPR026W	S_Alternate_Carbon_Metabolism
{'M_tre_e': 1.0, 'M_h_e': 1.0} <==> {'M_tre_c': 1.0, 'M_h_c': 1.0}	R_TREt2	46.81	R_trehalose_transport_in_via_proton_symporter		S_Transport__Extracellular
{'M_tre_c': 1.0, 'M_h_c': 1.0} <==> {'M_h_v': 1.0, 'M_tre_v': 1.0}	R_TREt2v	0.00999999	R_trehalose_vacuolar_transport_via_proton_symport		S_Transport__Vacuolar
{'M_ddcacoa_c': 0.059999999999999998, 'M_dcacoa_c': 0.02, 'M_tdcoa_c': 0.10000000000000001, 'M_ocdycacoa_c': 0.089999999999999997, 'M_pmtcoa_c': 0.27000000000000002, 'M_hdcoa_c': 0.17000000000000001, 'M_stcoa_c': 0.050000000000000003, 'M_odecoa_c': 0.23999999999999999, 'M_12dgr_SC_c': 0.01} <==> {'M_coa_c': 1.0, 'M_triglyc_SC_c': 0.01}	R_TRIGS_SC	13.25	R_triglycerol_synthesis	( YOR245C or YCR048W or YNR019W )	S_Glycerolipid_Metabolism
{'M_trp_L_e': 1.0, 'M_h_e': 1.0} <==> {'M_h_c': 1.0, 'M_trp_L_c': 1.0}	R_TRPt2r	56.8	R_L_tryptophan_reversible_transport_via_proton_symport	( YBR069C or YKR039W or YOL020W or YBR068C or YDR046C )	S_Transport__Extracellular
{'M_ttdca_e': 1.0} <==> {'M_ttdca_c': 1.0}	R_TTDCAtr	11.197	R_fatty_acid_transport		S_Transport__Extracellular
{'M_34hpp_m': 1.0, 'M_glu_L_m': 1.0} <==> {'M_akg_m': 1.0, 'M_tyr_L_m': 1.0}	R_TYRTAim	571.994	R_tyrosine_transaminase__irreversible__mitochondrial_	YKL106W	S_Tyrosine__Tryptophan__and_Phenylalanine_Metabolism
{'M_tyr_L_c': 1.0, 'M_h_c': 1.0} <==> {'M_h_m': 1.0, 'M_tyr_L_m': 1.0}	R_TYRt2m	-571.994	R_tyrosine_mitochondrial_transport_via_proton_symport		S_Transport__Mitochondrial
{'M_h_e': 1.0, 'M_tyr_L_e': 1.0} <==> {'M_tyr_L_c': 1.0, 'M_h_c': 1.0}	R_TYRt2r	-367.994	R_L_tyrosine_reversible_transport_via_proton_symport	( YBR069C or YKR039W or YCL025C or YBR068C or YOL020W or YDR046C or YCL025C )	S_Transport__Extracellular
{'M_tyr_L_c': 1.0, 'M_h_v': 1.0} <==> {'M_h_c': 1.0, 'M_tyr_L_v': 1.0}	R_TYRt6	0.001	R_L_tyrosine_transport_in_via_proton_antiport__vacuolar_	( YBR293W or YJR001W )	S_Transport__Vacuolar
{'M_tyr_L_v': 1.0, 'M_h_v': 1.0} <==> {'M_tyr_L_c': 1.0, 'M_h_c': 1.0}	R_TYRt7	0.001	R_L_tyrosine_transport_out_via_proton_symport__vacuolar	( YKL146W or YNL101W )	S_Transport__Vacuolar
{'M_utp_c': 1.0, 'M_h_c': 1.0, 'M_acgam1p_c': 1.0} <==> {'M_ppi_c': 1.0, 'M_udpacgal_c': 1.0}	R_UDPACGLP	0.002	R_UDP_N_acetylglucosamine_diphosphorylase	YDL103C	S_Glutamate_metabolism
{'M_ump_c': 1.0, 'M_atp_c': 1.0} <==> {'M_udp_c': 1.0, 'M_adp_c': 1.0}	R_UMPK	89.404	R_UMP_kinase	YKL024C	S_Nucleotide_Salvage_Pathway
{'M_glu_L_c': 1.0, 'M_2kmb_c': 1.0} <==> {'M_akg_c': 1.0, 'M_met_L_c': 1.0}	R_UNK3	572.195	R_2_keto_4_methylthiobutyrate_transamination		S_Methionine_Metabolism
{'M_hmbil_c': 1.0} <==> {'M_h2o_c': 1.0, 'M_uppg3_c': 1.0}	R_UPP3S	0.002	R_uroporphyrinogen_III_synthase	YOR278W	S_Porphyrin_and_Chlorophyll_Metabolism
{'M_uppg3_c': 1.0, 'M_h_c': 4.0} <==> {'M_co2_c': 4.0, 'M_cpppg3_c': 1.0}	R_UPPDC1	0.002	R_uroporphyrinogen_decarboxylase__uroporphyrinogen_III_	YDR047W	S_Porphyrin_and_Chlorophyll_Metabolism
{'M_prpp_c': 1.0, 'M_ura_c': 1.0} <==> {'M_ppi_c': 1.0, 'M_ump_c': 1.0}	R_UPPRT	0.001	R_uracil_phosphoribosyltransferase	YHR128W	S_Purine_and_Pyrimidine_Biosynthesis
{'M_urea_e': 1.0, 'M_h_e': 2.0} <==> {'M_h_c': 2.0, 'M_urea_c': 1.0}	R_UREA2t2	-15836.8	R_urea_reversible_transport_via_proton_symport__2_H_	YHL016C	S_Transport__Extracellular
{'M_h2o_c': 2.0, 'M_utp_c': 1.0} <==> {'M_pi_c': 2.0, 'M_h_c': 2.0, 'M_ump_c': 1.0}	R_UTPH1	0.001	R_UTP_diphosphohydrolase	YER005W	S_Nucleotide_Salvage_Pathway
{'M_akg_m': 1.0, 'M_val_L_m': 1.0} <==> {'M_glu_L_m': 1.0, 'M_3mob_m': 1.0}	R_VALTAim	571.995	R_valine_transaminase__mitochondiral	YHR208W	S_Valine__Leucine__and_Isoleucine_Metabolism
{'M_h_c': 1.0, 'M_val_L_c': 1.0} <==> {'M_h_m': 1.0, 'M_val_L_m': 1.0}	R_VALt2m	571.995	R_Valine_reversible_mitochondrial_transport_via_proton_symport		S_Transport__Mitochondrial
{'M_h_e': 1.0, 'M_val_L_e': 1.0} <==> {'M_h_c': 1.0, 'M_val_L_c': 1.0}	R_VALt2r	1101.19	R_L_valine_reversible_transport_via_proton_symport	( YKR039W or YCL025C or YDR046C or YBR069C or YBR068C )	S_Transport__Extracellular
{'M_zymst_e': 1.0} <==> {'M_zymst_c': 1.0}	R_ZYMSTt	4.399	R_zymosterol_reversible_transport	( YIL013C or YOR011W )	S_Transport__Extracellular
{'M_ump_c': 0.059900000000000002, 'M_camp_c': 9.9999999999999995e-07, 'M_gmp_c': 0.045999999999999999, 'M_cys_L_c': 0.0066, 'M_q6_m': 9.9999999999999995e-07, 'M_fad_c': 9.9999999999999995e-07, 'M_dtmp_c': 0.0035999999999999999, 'M_13BDglcn_c': 1.1348, 'M_amp_c': 0.045999999999999999, 'M_tyr_L_c': 0.10199999999999999, 'M_atp_c': 59.276000000000003, 'M_coa_c': 9.9999999999999995e-07, 'M_glu_L_c': 0…	R_biomass_published	2000	R_biomass_published
