# Supplementary material for: Inferring Metabolic States in Uncharacterized Environments Using Gene-Expression Measurements
Source: PLoS Comput Biol. 2013 Mar 21;9(3):e1002988. doi: 10.1371/journal.pcbi.1002988 (PMC3605102; doi:10.1371/journal.pcbi.1002988)
Supplement: Table S6 — Metabolic state of yeast cells growing on YPEtOH. Reaction stoichiometries, identifiers, names, associated genes and predicted fluxes are listed. Reactions with absolute fluxes lower than 10E-10 are not shown. (XLSX) [file pcbi.1002988.s009.xlsx]

## Sheet: tableS5_metabolicState_eth_15_8
rxn	id	flux	name	genes
{'M_13BDglcn_e': 1.0, 'M_h2o_e': 1.0} <==> {'M_glc_D_e': 1.0}	R_13BGHe	5190.34	R_Exo_1_3_beta_glucan_glucohydrase	( YOR190W or YDR261C or YLR300W )	S_Starch_and_Sucrose_Metabolism
{'M_udpg_c': 1.0} <==> {'M_udp_c': 1.0, 'M_h_c': 1.0, 'M_13BDglcn_c': 1.0}	R_13GS	2269.6	R_1_3_beta_glucan_synthase	( ( ( YCR034W and YGR032W ) and YLR343W ) or ( ( YCR034W and YGR032W ) and YMR215W ) or ( ( YCR034W and YMR306W ) and YMR215W ) or ( ( YCR034W and YLR342W ) and YOL132W ) or ( ( YCR034W and YMR306W ) and YOL132W ) or ( ( YCR034W and YGR032W ) and YOL030W ) or ( ( YCR034W and YLR342W ) and YOL030W ) or ( ( YCR034W and YMR306W ) and YOL030W ) or ( ( YCR034W and YLR342W ) and YLR343W ) or ( ( YCR034…	S_Alternate_Carbon_Metabolism
{'M_amet_m': 1.0, 'M_2hpmhmbq_m': 1.0} <==> {'M_ahcys_m': 1.0, 'M_q6_m': 1.0, 'M_h_m': 1.0}	R_2HMHMBQMTm	0.002	R_2_hexaprenyl_3_methyl_5_hydroxy_6_methoxy_1_4_benzoquinone_methyltransferase__mitochondrial	( YOL096C and YDR204W and YML110C and YGR255C and YOR125C and YGL119W and YLR201C )	S_Quinone_Biosynthesis
{'M_2hp6mp_m': 1.0, 'M_o2_m': 1.0} <==> {'M_2hp6mbq_m': 1.0, 'M_h2o_m': 1.0}	R_2HP6MPMOm	0.002	R_2_Hexaprenyl_6_methoxyphenol_monooxygenase__mitochondrial	( YOL096C and YDR204W and YML110C and YGR255C and YOR125C and YGL119W and YLR201C )	S_Quinone_Biosynthesis
{'M_2hp6mbq_m': 1.0, 'M_amet_m': 1.0} <==> {'M_ahcys_m': 1.0, 'M_2hpmmbq_m': 1.0, 'M_h_m': 1.0}	R_2HPMBQMTm	0.002	R_2_hexaprenyl_6_methoxy_1_4_benzoquinone_methyltransferase__mitochondrial	( YOL096C and YDR204W and YML110C and YGR255C and YOR125C and YGL119W and YLR201C )	S_Quinone_Biosynthesis
{'M_2hpmmbq_m': 1.0, 'M_o2_m': 0.5} <==> {'M_2hpmhmbq_m': 1.0}	R_2HPMMBQMOm	0.002	R_2_hexaprenyl_3_methyl_6_methoxy_1_4_benzoquinone_monooxygenase__mitochondrial	( YOL096C and YDR204W and YML110C and YGR255C and YOR125C and YGL119W and YLR201C )	S_Quinone_Biosynthesis
{'M_2mbtoh_c': 1.0} <==> {'M_2mbtoh_e': 1.0}	R_2MBTOHt	29.232	R_2_methyl_1_butanol_transport__extracellular_		S_Transport__Extracellular
{'M_2obut_c': 1.0} <==> {'M_2obut_m': 1.0}	R_2OBUTtm	58.466	R_2obut_transporter__mitochondrial_		S_Transport__Mitochondrial
{'M_2oxoadp_m': 1.0} <==> {'M_2oxoadp_c': 1.0}	R_2OXOADPtim	0.002	R_2_oxoadipate_transport_out_of_mitochondria_via_diffusion		S_Transport__Mitochondrial
{'M_2phetoh_e': 1.0} <==> {'M_2phetoh_c': 1.0}	R_2PHETOHt	-0.001	R_2_phenylethanol_reversible_transport		S_Transport__Extracellular
{'M_amet_m': 1.0, 'M_3dh5hpb_m': 1.0} <==> {'M_3hph5mb_m': 1.0, 'M_ahcys_m': 1.0, 'M_h_m': 1.0}	R_3DH5HPBMTm	0.002	R_S_adenosyl_L_methionine3_hexaprenyl_4_5_dihydroxylate_O_methyltransferase__mitochondrial	( YOL096C and YDR204W and YML110C and YGR255C and YOR125C and YGL119W and YLR201C )	S_Quinone_Biosynthesis
{'M_3dh5hpb_c': 1.0} <==> {'M_3dh5hpb_m': 1.0}	R_3DH5HPBtm	0.002	R_3_Hexaprenyl_4_5_dihydroxybenzoate_transport__mitochondrial		S_Transport__Mitochondrial
{'M_o2_c': 1.0, 'M_3hanthrn_c': 1.0} <==> {'M_h_c': 1.0, 'M_cmusa_c': 1.0}	R_3HAO	0.001	R_3_hydroxyanthranilate_3_4_dioxygenase	YJR025C	S_Tyrosine__Tryptophan__and_Phenylalanine_Metabolism
{'M_3hph5mb_m': 1.0} <==> {'M_2hp6mp_m': 1.0, 'M_co2_m': 1.0}	R_3HPH5MBDCm	0.002	R_3_Hexaprenyl_4_hydroxy_5_methoxybenzoate_decarboxylase__mitochondrial		S_Quinone_Biosynthesis
{'M_3mob_c': 1.0, 'M_h_c': 1.0} <==> {'M_2mppal_c': 1.0, 'M_co2_c': 1.0}	R_3MOBDC	0.001	R_3_Methyl_2_oxobutanoate_decarboxylase	( YLR134W or YLR044C or ( YGR087C and YGR087C ) )	S_Complex_Alcohol_Metabolism
{'M_h_c': 1.0, 'M_3mop_c': 1.0} <==> {'M_co2_c': 1.0, 'M_2mbald_c': 1.0}	R_3MOPDC	29.232	R_3_Methyl_2_oxopentanoate_decarboxylase	( YLR044C or YDL080C or YLR134W or YGR087C or YDR380W )	S_Complex_Alcohol_Metabolism
{'M_3mop_c': 1.0} <==> {'M_3mop_m': 1.0}	R_3MOPtm	-29.232	R_3_Methyl_2_oxopentanoate_transport__diffusion__mitochondrial		S_Transport__Mitochondrial
{'M_o2_c': 0.5, 'M_3ophb_5_c': 1.0} <==> {'M_3dh5hpb_c': 1.0}	R_3OPHB5Hm	0.002	R_3_Hexaprenyl_4_5_dihydroxybenzoate_hydroxylase__mitochondrial		S_Quinone_Biosynthesis
{'M_3ophb_5_c': 1.0} <==> {'M_3ophb_5_m': 1.0}	R_3OPHB_5tm	-0.002	R_3_Octaprenyl_4_hydroxybenzoate_mitochondrial_transport		S_Transport__Mitochondrial
{'M_4abz_c': 1.0} <==> {'M_4abz_e': 1.0}	R_4ABZt	-0.002	R_4_Aminobenzoate_mitochondrial_transport_via_diffusion		S_Transport__Extracellular
{'M_4abz_c': 1.0} <==> {'M_4abz_m': 1.0}	R_4ABZtm	0.002	R_4_Aminobenzoate_mitochondrial_transport_via_diffusion		S_Transport__Mitochondrial
{'M_4hbz_c': 1.0} <==> {'M_4hbz_m': 1.0}	R_4HBZtm	0.002	R_4_Hydroxybenzoate_mitochondrial_transport		S_Transport__Mitochondrial
{'M_4mop_c': 1.0, 'M_h_c': 1.0} <==> {'M_co2_c': 1.0, 'M_3mbald_c': 1.0}	R_4MOPDC	0.001	R_4_Methyl_2_oxopentanoate_decarboxylase	( YDL080C or YDR380W )	S_Complex_Alcohol_Metabolism
{'M_5aop_e': 1.0, 'M_h_e': 1.0} ---> {'M_h_c': 1.0, 'M_5aop_c': 1.0}	R_5AOPt2	0.016	R_5_Aminolevulinate_transport_in_via_proton_symport	YDL210W	S_Transport__Extracellular
{'M_6pgl_c': 1.0} <==> {'M_6pgl_r': 1.0}	R_6PGLter	-257.351	R_6_phospho_D_glucono_1_5_lactone_endoplasmic_reticular_transport_via_diffusion		S_Transport__Endoplasmic_Reticular
{'M_L2aadp_c': 1.0, 'M_nadph_c': 1.0, 'M_h_c': 1.0, 'M_atp_c': 1.0} ---> {'M_ppi_c': 1.0, 'M_L2aadp6sa_c': 1.0, 'M_nadp_c': 1.0, 'M_amp_c': 1.0}	R_AASAD1	0.002	R_L_aminoadipate_semialdehyde_dehydrogenase__NADPH_	( YBR115C and YGL154C )	S_Threonine_and_Lysine_Metabolism
{'M_glu_L_c': 1.0, 'M_2oxoadp_c': 1.0} <==> {'M_L2aadp_c': 1.0, 'M_akg_c': 1.0}	R_AATA	0.002	R_2_aminoadipate_transaminase		S_Threonine_and_Lysine_Metabolism
{'M_4abut_c': 1.0, 'M_akg_c': 1.0} <==> {'M_glu_L_c': 1.0, 'M_sucsal_c': 1.0}	R_ABTA	65135.4	R_4_aminobutyrate_transaminase	YGR019W	S_Glutamate_metabolism
{'M_accoa_m': 2.0} ---> {'M_aacoa_m': 1.0, 'M_coa_m': 1.0}	R_ACACT1m	0.012	R_acetyl_CoA_C_acetyltransferase__mitochondrial	YPL028W	S_Fatty_Acid__Biosynthesis
{'M_acald_c': 2.0} <==> {'M_actn_R_c': 1.0}	R_ACALDCD	71538.1	R_Acetaldehyde_condensation	( YLR044C or YGR087C or YLR134W )	S_Alternate_Carbon_Metabolism
{'M_acald_e': 1.0} <==> {'M_acald_c': 1.0}	R_ACALDt	230735	R_acetaldehyde_reversible_transport		S_Transport__Extracellular
{'M_acald_m': 1.0} <==> {'M_acald_c': 1.0}	R_ACALDtm	-87658.6	R_acetaldehyde_mitochondrial_diffusion		S_Transport__Mitochondrial
{'M_accoa_c': 1.0, 'M_atp_c': 1.0, 'M_hco3_c': 1.0} <==> {'M_malcoa_c': 1.0, 'M_h_c': 1.0, 'M_adp_c': 1.0, 'M_pi_c': 1.0}	R_ACCOACr	75.04	R_acetyl_CoA_carboxylase__reversible_reaction	YNR016C	S_Fatty_Acid__Biosynthesis
{'M_accoa_c': 1.0, 'M_gam6p_c': 1.0} <==> {'M_h_c': 1.0, 'M_coa_c': 1.0, 'M_acgam6p_c': 1.0}	R_ACGAM6PS	0.002	R_N_acetylglucosamine_6_phosphate_synthase	YFL017C	S_Glutamate_metabolism
{'M_acgam6p_c': 1.0} <==> {'M_acgam1p_c': 1.0}	R_ACGAMPM	0.002	R_phosphoacetylglucosamine_mutase	YEL058W	S_Glutamate_metabolism
{'M_2obut_m': 1.0, 'M_h_m': 1.0, 'M_pyr_m': 1.0} ---> {'M_2ahbut_m': 1.0, 'M_co2_m': 1.0}	R_ACHBSm	29.232	R_2_aceto_2_hydroxybutanoate_synthase__mitochondrial	( YCL009C and YMR108W )	S_Valine__Leucine__and_Isoleucine_Metabolism
{'M_h2o_c': 1.0, 'M_iamac_c': 1.0} <==> {'M_ac_c': 1.0, 'M_iamoh_c': 1.0, 'M_h_c': 1.0}	R_ACHLE1	0.001	R_Isoamyl_acetate_hydrolyzing_esterase	YOR126C	S_Complex_Alcohol_Metabolism
{'M_h2o_m': 1.0, 'M_accoa_m': 1.0} <==> {'M_coa_m': 1.0, 'M_h_m': 1.0, 'M_ac_m': 1.0}	R_ACOAHim	0.001	R_acetyl_CoA_hydrolase__mitochondrial__irreversible_	YBL015W	S_Pyruvate_Metabolism
{'M_cit_c': 1.0} <==> {'M_icit_c': 1.0}	R_ACONT	80272.9	R_aconitase	YLR304C	S_Citric_Acid_Cycle
{'M_2mcit_m': 1.0} <==> {'M_micit_m': 1.0}	R_ACONT3m	29.234	R_aconitase__mitochondrial	YPR002W	S_Anaplerotic_reactions
{'M_cit_m': 1.0} <==> {'M_icit_m': 1.0}	R_ACONTm	7385.69	R_Aconitate_hydratase	( YLR304C or YJL200C )	S_Citric_Acid_Cycle
{'M_coa_m': 1.0, 'M_h2o_m': 1.0} <==> {'M_pan4p_m': 1.0, 'M_pap_m': 1.0, 'M_h_m': 2.0}	R_ACPSm	0.001	R_acyl_carrier_protein_synthase__mitochondrial	YPL148C	S_Pantothenate_and_CoA_Biosynthesis
{'M_ac_c': 1.0, 'M_atp_c': 1.0, 'M_coa_c': 1.0} <==> {'M_accoa_c': 1.0, 'M_ppi_c': 1.0, 'M_amp_c': 1.0}	R_ACS	84.006	R_acetyl_CoA_synthetase	YLR153C	S_Pyruvate_Metabolism
{'M_coa_m': 1.0, 'M_atp_m': 1.0, 'M_ac_m': 1.0} <==> {'M_amp_m': 1.0, 'M_ppi_m': 1.0, 'M_accoa_m': 1.0}	R_ACSm	87658.6	R_acetyl_CoA_synthetase	YAL054C	S_Pyruvate_Metabolism
{'M_h_e': 1.0, 'M_ac_e': 1.0} <==> {'M_ac_c': 1.0, 'M_h_c': 1.0}	R_ACt2r	84.005	R_acetate_reversible_transport_via_proton_symport	YCR032W	S_Transport__Extracellular
{'M_h_e': 1.0, 'M_ade_e': 1.0} <==> {'M_ade_c': 1.0, 'M_h_c': 1.0}	R_ADEt2	40.745	R_adenine_transport_in_via_proton_symport	( YER056C or YER060W or YER060W-A or YGL186C )	S_Transport__Extracellular
{'M_nadph_c': 1.0, 'M_h_c': 1.0, 'M_1agly3p_SC_c': 0.01} <==> {'M_1ag3p_SC_c': 0.01, 'M_nadp_c': 1.0}	R_ADHAPR_SC	49.399	R_acyldihydroxyacetonephosphate_reductase__yeast_specific	YIL124W	S_Phospholipid_Biosynthesis
{'M_atp_c': 1.0, 'M_amp_c': 1.0} <==> {'M_adp_c': 2.0}	R_ADK1	616.677	R_adenylate_kinase	YDR226W	S_Nucleotide_Salvage_Pathway
{'M_amp_m': 1.0, 'M_atp_m': 1.0} <==> {'M_adp_m': 2.0}	R_ADK1m	87658.6	R_adenylate_kinase__mitochondrial	YER170W	S_Nucleotide_Salvage_Pathway
{'M_itp_c': 1.0, 'M_amp_c': 1.0} <==> {'M_idp_c': 1.0, 'M_adp_c': 1.0}	R_ADK4	0.001	R_adentylate_kinase__ITP_	YDR226W	S_Nucleotide_Salvage_Pathway
{'M_atp_c': 1.0} <==> {'M_ppi_c': 1.0, 'M_camp_c': 1.0}	R_ADNCYC	0.00299999	R_adenylate_cyclase	YJL005W	S_Purine_and_Pyrimidine_Biosynthesis
{'M_prpp_c': 1.0, 'M_ade_c': 1.0} <==> {'M_ppi_c': 1.0, 'M_amp_c': 1.0}	R_ADPT	99.211	R_adenine_phosphoribosyltransferase	( YML022W or YDR441C )	S_Nucleotide_Salvage_Pathway
{'M_atp_c': 1.0, 'M_aps_c': 1.0} <==> {'M_paps_c': 1.0, 'M_h_c': 1.0, 'M_adp_c': 1.0}	R_ADSK	0.001	R_adenylyl_sulfate_kinase	YKL001C	S_Cysteine_Metabolism
{'M_ddcacoa_c': 0.059999999999999998, 'M_dcacoa_c': 0.02, 'M_tdcoa_c': 0.10000000000000001, 'M_ocdycacoa_c': 0.089999999999999997, 'M_pmtcoa_c': 0.27000000000000002, 'M_hdcoa_c': 0.17000000000000001, 'M_stcoa_c': 0.050000000000000003, 'M_odecoa_c': 0.23999999999999999, 'M_1ag3p_SC_c': 0.01} <==> {'M_pa_SC_c': 0.01, 'M_coa_c': 1.0}	R_AGAT_SC	49.4	R_1_Acyl_glycerol_3_phosphate_acyltransferase__yeast_specific	YDL052C	S_Phospholipid_Biosynthesis
{'M_ala_L_c': 1.0, 'M_glx_c': 1.0} <==> {'M_pyr_c': 1.0, 'M_gly_c': 1.0}	R_AGTi	109361	R_Alanine_glyoxylate_aminotransferase__irreversible_	YFL030W	S_Glycine_and_Serine_Metabolism
{'M_ahcys_c': 1.0} <==> {'M_ahcys_m': 1.0}	R_AHCYStm	-0.006	R_S_adenosyl_L_homocysteine_reversible_transport__mitochondrial		S_Transport__Mitochondrial
{'M_h2o_c': 1.0, 'M_ahcys_c': 1.0} <==> {'M_hcys_L_c': 1.0, 'M_adn_c': 1.0}	R_AHCi	58.466	R_adenosylhomocysteinase	YER043C	S_Methionine_Metabolism
{'M_akg_m': 1.0, 'M_h_m': 1.0, 'M_lpam_m': 1.0} <==> {'M_sdhlam_m': 1.0, 'M_co2_m': 1.0}	R_AKGDam	7385.69	R_oxoglutarate_dehydrogenase__lipoamide_	( YIL125W and YDR148C and YFL018C )	S_Citric_Acid_Cycle
{'M_coa_m': 1.0, 'M_sdhlam_m': 1.0} <==> {'M_succoa_m': 1.0, 'M_dhlam_m': 1.0}	R_AKGDbm	7385.69	R_oxoglutarate_dehydrogenase__dihydrolipoamide_S_succinyltransferase_	( YIL125W and YDR148C and YFL018C )	S_Citric_Acid_Cycle
{'M_akg_e': 1.0, 'M_h_e': 1.0} <==> {'M_akg_c': 1.0, 'M_h_c': 1.0}	R_AKGt2r	-51126.5	R_2_oxoglutarate_reversible_transport_via_symport		S_Transport__Extracellular
{'M_ala_L_m': 1.0, 'M_akg_m': 1.0} <==> {'M_pyr_m': 1.0, 'M_glu_L_m': 1.0}	R_ALATA_Lm	-0.002	R_L_alanine_transaminase__mitochondrial	YLR089C	S_Alanine_and_Aspartate_Metabolism
{'M_ala_L_e': 1.0, 'M_h_e': 1.0} <==> {'M_ala_L_c': 1.0, 'M_h_c': 1.0}	R_ALAt2r	110278	R_L_alanine_reversible_transport_via_proton_symport	( YKR039W or YPL265W or YCL025C or YOL020W or YOR348C )	S_Transport__Extracellular
{'M_ala_L_m': 1.0} ---> {'M_ala_L_c': 1.0}	R_ALAtmi	0.002	R_Alanine_transport_from_mitochondia_to_cytoplasm		S_Transport__Mitochondrial
{'M_h_c': 1.0, 'M_2mbald_c': 1.0, 'M_nadh_c': 1.0} <==> {'M_nad_c': 1.0, 'M_2mbtoh_c': 1.0}	R_ALCD22xi	29.232	R_aldehyde_dehydrogenase__2_methylbutanol__NAD_	( YBR145W or YMR303C or YDL168W or YGL256W or YOL086C )	S_Complex_Alcohol_Metabolism
{'M_2mppal_c': 1.0, 'M_h_c': 1.0, 'M_nadh_c': 1.0} <==> {'M_nad_c': 1.0, 'M_ibutoh_c': 1.0}	R_ALCD23xi	0.001	R_aldehyde_dehydrogenase__isobutyl_alcohol__NAD_	( YGL256W or YBR145W or YDL168W or YOL086C or YMR303C )	S_Complex_Alcohol_Metabolism
{'M_h_c': 1.0, 'M_3mbald_c': 1.0, 'M_nadh_c': 1.0} <==> {'M_iamoh_c': 1.0, 'M_nad_c': 1.0}	R_ALCD24xi	0.001	R_aldehyde_dehydrogenase__isoamyl_alcohol__NAD_	( YDL168W or YGL256W or YMR303C or YOL086C or YBR145W )	S_Complex_Alcohol_Metabolism
{'M_h_c': 1.0, 'M_nadh_c': 1.0, 'M_pacald_c': 1.0} <==> {'M_nad_c': 1.0, 'M_2phetoh_c': 1.0}	R_ALCD25xi	0.001	R_aldehyde_dehydrogenase__2_phenylethanol__NAD_	( YGL256W or YMR303C or YDL168W or YOL086C or YBR145W )	S_Complex_Alcohol_Metabolism
{'M_etoh_c': 1.0, 'M_nad_c': 1.0} <==> {'M_h_c': 1.0, 'M_nadh_c': 1.0, 'M_acald_c': 1.0}	R_ALCD2if	0.001	R_alcohol_dehydrogenase__forward_rxn__ethanol___acetaldehyde_	YMR303C	S_Pyruvate_Metabolism
{'M_acald_m': 1.0, 'M_nad_m': 1.0, 'M_h2o_m': 1.0} <==> {'M_nadh_m': 1.0, 'M_h_m': 2.0, 'M_ac_m': 1.0}	R_ALDD2xm	87629.4	R_aldehyde_dehydrogenase__acetylaldehyde__NAD___mitochondrial	YOR374W	S_Pyruvate_Metabolism
{'M_acald_m': 1.0, 'M_nadp_m': 1.0, 'M_h2o_m': 1.0} <==> {'M_nadph_m': 1.0, 'M_h_m': 2.0, 'M_ac_m': 1.0}	R_ALDD2ym	29.231	R_aldehyde_dehydrogenase__acetylaldehyde__NADP___mitochondrial	( YER073W or YOR374W )	S_Pyruvate_Metabolism
{'M_h2o_c': 1.0, 'M_alltt_c': 1.0} <==> {'M_urdglyc_c': 1.0, 'M_urea_c': 1.0}	R_ALLTAHr	29087.8	R_Allantoate_amidinohydrolase__reversible	YIR029W	S_Histidine_Metabolism
{'M_alltn_c': 1.0, 'M_h2o_c': 1.0} <==> {'M_h_c': 1.0, 'M_alltt_c': 1.0}	R_ALLTNr	29087.8	R_allantoinase__reversible_reaction	YIR027C	S_Histidine_Metabolism
{'M_alltn_e': 1.0} <==> {'M_alltn_c': 1.0}	R_ALLTNti	29087.8	R_allantoin_irreversible_uniport	YIR028W	S_Transport__Extracellular
{'M_alltt_e': 1.0} <==> {'M_alltt_c': 1.0}	R_ALLTTti	0.001	R_allantoate_irreversible_uniport	YJR152W	S_Transport__Extracellular
{'M_amet_e': 1.0, 'M_h_e': 1.0} <==> {'M_h_c': 1.0, 'M_amet_c': 1.0}	R_AMETt2	58.466	R_S_adenosyl_L_methionine_transport_in_via_proton_symport	YPL274W	S_Transport__Extracellular
{'M_amet_c': 1.0} <==> {'M_amet_m': 1.0}	R_AMETtm	0.006	R_S_Adenosyl_L_methionine_reversible_transport__mitochondrial	YNL003C	S_Transport__Mitochondrial
{'M_h2o_c': 1.0, 'M_ap4a_c': 1.0} <==> {'M_h_c': 2.0, 'M_adp_c': 2.0}	R_AP4AHr	0.001	R_Ap4A_hydrolase__reversible	YDR305C	S_Purine_and_Pyrimidine_Biosynthesis
{'M_h2o_c': 1.0, 'M_arg_L_c': 1.0} ---> {'M_urea_c': 1.0, 'M_orn_c': 1.0}	R_ARGN	0.001	R_arginase	YPL111W	S_Arginine_and_Proline_Metabolism
{'M_argsuc_c': 1.0} <==> {'M_fum_c': 1.0, 'M_arg_L_c': 1.0}	R_ARGSL	0.001	R_argininosuccinate_lyase	YHR018C	S_Arginine_and_Proline_Metabolism
{'M_citr_L_c': 1.0, 'M_atp_c': 1.0, 'M_asp_L_c': 1.0} <==> {'M_ppi_c': 1.0, 'M_h_c': 1.0, 'M_argsuc_c': 1.0, 'M_amp_c': 1.0}	R_ARGSSr	0.001	R_argininosuccinate_synthase__reversible	YOL058W	S_Arginine_and_Proline_Metabolism
{'M_arg_L_e': 1.0, 'M_h_e': 1.0} <==> {'M_arg_L_c': 1.0, 'M_h_c': 1.0}	R_ARGt2r	321.4	R_L_arganine_reversible_transport_via_proton_symport	( YKR039W or YEL063C or YNL270C )	S_Transport__Extracellular
{'M_h2o_e': 1.0, 'M_asn_L_e': 1.0} <==> {'M_asp_L_e': 1.0, 'M_nh4_e': 1.0}	R_ASNNe	0.001	R_L_asparaginase__extracellular	( YLR160C or YLR158C or YLR157C or YLR155C )	S_Asparagine_metabolism
{'M_h2o_c': 1.0, 'M_gln_L_c': 1.0, 'M_atp_c': 1.0, 'M_asp_L_c': 1.0} ---> {'M_asn_L_c': 1.0, 'M_glu_L_c': 1.0, 'M_h_c': 1.0, 'M_ppi_c': 1.0, 'M_amp_c': 1.0}	R_ASNS1	203.401	R_asparagine_synthase__glutamine_hydrolysing_	( YML096W or YGR124W or YPR145W )	S_Alanine_and_Aspartate_Metabolism
{'M_h_e': 1.0, 'M_asn_L_e': 1.0} <==> {'M_asn_L_c': 1.0, 'M_h_c': 1.0}	R_ASNt2r	-0.001	R_L_asparagine_reversible_transport_via_proton_symport	( YKR039W or YCL025C or YDR508C or YPL265W )	S_Transport__Extracellular
{'M_cbp_c': 1.0, 'M_asp_L_c': 1.0} <==> {'M_pi_c': 1.0, 'M_h_c': 1.0, 'M_cbasp_c': 1.0}	R_ASPCT	119.801	R_aspartate_carbamoyltransferase	YJL130C	S_Purine_and_Pyrimidine_Biosynthesis
{'M_akg_c': 1.0, 'M_asp_L_c': 1.0} <==> {'M_glu_L_c': 1.0, 'M_oaa_c': 1.0}	R_ASPTA	-174496	R_aspartate_transaminase	YLR027C	S_Alanine_and_Aspartate_Metabolism
{'M_asp_L_e': 1.0, 'M_h_e': 1.0} <==> {'M_h_c': 1.0, 'M_asp_L_c': 1.0}	R_ASPt2r	-173578	R_L_aspartate_reversible_transport_via_proton_symport	( YFL055W or YKR039W or YPL265W )	S_Transport__Extracellular
{'M_atp_c': 1.0, 'M_h_c': 1.0, 'M_adp_c': 1.0} <==> {'M_pi_c': 1.0, 'M_ap4a_c': 1.0}	R_ATPATF1	0.001	R_ATP_adenylyltransferase	YDR530C	S_Purine_and_Pyrimidine_Biosynthesis
{'M_adp_m': 1.0, 'M_h_c': 3.0, 'M_pi_m': 1.0} ---> {'M_atp_m': 1.0, 'M_h_m': 2.0, 'M_h2o_m': 1.0}	R_ATPS3m	407791	R_ATP_synthase__mitochondrial	( ( Q0080 and Q0085 and Q0130 and YBL099W and YBR039W and YDL004W and YDL181W and YDR298C and YDR377W and YJR121W and YKL016C and YLR295C and YML081C-A and YPL078C and YPL271W ) or ( Q0080 and Q0085 and Q0130 and YBL099W and YBR039W and YDL004W and YDL181W and YDR298C and YDR322C-A and YDR377W and YJR121W and YKL016C and YLR295C and YML081C-A and YOL077W-A and YPL078C and YPL271W and YPR020W ) )	S_Oxidative_Phosphorylation
{'M_atp_m': 1.0, 'M_h_c': 1.0, 'M_adp_c': 1.0} <==> {'M_adp_m': 1.0, 'M_atp_c': 1.0, 'M_h_m': 1.0}	R_ATPtm_H	239860	R_ADPATP_transporter__mitochondrial	( YBR085W or YBL030C or YMR056C )	S_Transport__Mitochondrial
{'M_nad_c': 1.0, 'M_btd_RR_c': 1.0} <==> {'M_h_c': 1.0, 'M_actn_R_c': 1.0, 'M_nadh_c': 1.0}	R_BTDD_RR	-71538.1	R__R_R__butanediol_dehydrogenase	YAL060W	S_Alternate_Carbon_Metabolism
{'M_btd_RR_c': 1.0} <==> {'M_btd_RR_e': 1.0}	R_BTDt_RR	71538.1	R__R_R__butanediol_transport		S_Transport__Extracellular
{'M_o2_c': 1.0, 'M_ergtrol_c': 1.0, 'M_h_c': 1.0, 'M_nadph_c': 1.0} <==> {'M_h2o_c': 2.0, 'M_ergtetrol_c': 1.0, 'M_nadp_c': 1.0}	R_C22STDS	234.591	R_C_22_sterol_desaturase__NADP_	( YMR015C and YHR042W )	S_Sterol_Metabolism
{'M_h_r': 1.0, 'M_nadph_r': 1.0, 'M_ergtetrol_r': 1.0} <==> {'M_ergst_r': 1.0, 'M_nadp_r': 1.0}	R_C24STRer	257.351	R_C_s24_sterol_reductase__endoplamic_reticular	YGL012W	S_Sterol_Metabolism
{'M_o2_c': 1.0, 'M_nadph_c': 1.0, 'M_h_c': 1.0, 'M_epist_c': 1.0} <==> {'M_h2o_c': 2.0, 'M_ergtrol_c': 1.0, 'M_nadp_c': 1.0}	R_C5STDS	234.591	R_C_5_sterol_desaturase	YLR056W	S_Sterol_Metabolism
{'M_h2o2_c': 2.0} <==> {'M_h2o_c': 2.0, 'M_o2_c': 1.0}	R_CAT	59.8995	R_catalase	YGR088W	S_Tyrosine__Tryptophan__and_Phenylalanine_Metabolism
{'M_h2o_c': 1.0, 'M_gln_L_c': 1.0, 'M_atp_c': 2.0, 'M_hco3_c': 1.0} <==> {'M_cbp_c': 1.0, 'M_glu_L_c': 1.0, 'M_h_c': 2.0, 'M_adp_c': 2.0, 'M_pi_c': 1.0}	R_CBPS	119.802	R_carbamoyl_phosphate_synthase__glutamine_hydrolysing_	( ( YJR109C and YOR303W ) or YJL130C )	S_Arginine_and_Proline_Metabolism
{'M_cer1_24_r': 1.0, 'M_h_r': 1.0, 'M_coa_r': 1.0} <==> {'M_sphgn_r': 1.0, 'M_ttccoa_r': 1.0}	R_CERASE124er	0.001	R_alkaline_ceramidase__ceramide_1___endoplasmic_reticulum	YPL087W	S_Sphingolipid_Metabolism
{'M_h_r': 1.0, 'M_cer1_26_r': 1.0, 'M_coa_r': 1.0} <==> {'M_hexccoa_r': 1.0, 'M_sphgn_r': 1.0}	R_CERASE126er	0.001	R_alkaline_ceramidase__ceramide_1___endoplasmic_reticulum	YPL087W	S_Sphingolipid_Metabolism
{'M_h_r': 1.0, 'M_cer2_24_r': 1.0, 'M_coa_r': 1.0} <==> {'M_ttccoa_r': 1.0, 'M_psphings_r': 1.0}	R_CERASE224er	0.001	R_alkaline_ceramidase__ceramide_2___endoplasmic_reticulum	( YPL087W or YBR183W )	S_Sphingolipid_Metabolism
{'M_h_r': 1.0, 'M_cer2_26_r': 1.0, 'M_coa_r': 1.0} <==> {'M_hexccoa_r': 1.0, 'M_psphings_r': 1.0}	R_CERASE226er	0.001	R_alkaline_ceramidase__ceramide_2___endoplasmic_reticulum	( YPL087W or YBR183W )	S_Sphingolipid_Metabolism
{'M_sphgn_r': 1.0, 'M_ttccoa_r': 1.0} <==> {'M_cer1_24_r': 1.0, 'M_h_r': 1.0, 'M_coa_r': 1.0}	R_CERS124er	0.001	R_Ceramide_1_synthase__24C___endoplasmic_reticular	( YHL003C or YKL008C or YPL087W )	S_Sphingolipid_Metabolism
{'M_hexccoa_r': 1.0, 'M_sphgn_r': 1.0} <==> {'M_h_r': 1.0, 'M_cer1_26_r': 1.0, 'M_coa_r': 1.0}	R_CERS126er	0.001	R_Ceramide_1_synthase__26C___endoplasmic_reticular	( YHL003C or YKL008C or YPL087W )	S_Sphingolipid_Metabolism
{'M_ttccoa_r': 1.0, 'M_psphings_r': 1.0} <==> {'M_h_r': 1.0, 'M_cer2_24_r': 1.0, 'M_coa_r': 1.0}	R_CERS224er	0.001	R_Ceramide_2_synthase__24C___endoplasmic_reticular	( YHL003C or YKL008C or YBR183W )	S_Sphingolipid_Metabolism
{'M_hexccoa_r': 1.0, 'M_psphings_r': 1.0} <==> {'M_h_r': 1.0, 'M_cer2_26_r': 1.0, 'M_coa_r': 1.0}	R_CERS226er	0.001	R_Ceramide_2_synthase__26C___endoplasmic_reticular	( YHL003C or YKL008C or YBR183W )	S_Sphingolipid_Metabolism
{'M_ctp_c': 1.0, 'M_h_c': 1.0, 'M_cholp_c': 1.0} <==> {'M_ppi_c': 1.0, 'M_cdpchol_c': 1.0}	R_CHLPCTD	0.101	R_choline_phosphate_cytididyltransferase	YGR202C	S_Phospholipid_Biosynthesis
{'M_zymst_c': 1.0, 'M_o2_c': 1.0, 'M_amet_c': 1.0} ---> {'M_h2o_c': 2.0, 'M_h_c': 1.0, 'M_ahcys_c': 1.0, 'M_ergtetrol_c': 1.0}	R_CHLSTI	22.76	R_cholestenol_delta_isomerase__lumped_reaction		S_Sterol_Metabolism
{'M_atp_c': 1.0, 'M_chol_c': 1.0} <==> {'M_h_c': 1.0, 'M_adp_c': 1.0, 'M_cholp_c': 1.0}	R_CHOLK	0.101	R_Choline_kinase	YLR133W	S_Phospholipid_Biosynthesis
{'M_chor_c': 1.0} <==> {'M_pphn_c': 1.0}	R_CHORM	0.001	R_chorismate_mutase	YPR060C	S_Tyrosine__Tryptophan__and_Phenylalanine_Metabolism
{'M_3psme_c': 1.0} <==> {'M_pi_c': 1.0, 'M_chor_c': 1.0}	R_CHORS	0.003	R_chorismate_synthase	YGL148W	S_Tyrosine__Tryptophan__and_Phenylalanine_Metabolism
{'M_chor_c': 1.0} ---> {'M_pyr_c': 1.0, 'M_4hbz_c': 1.0}	R_CHRPL	0.002	R_Chorismate_pyruvate_lyase		S_Quinone_Biosynthesis
{'M_udpacgal_c': 1.0} <==> {'M_udp_c': 1.0, 'M_h_c': 1.0, 'M_chitin_c': 1.0}	R_CHTNS	0.002	R_chitin_synthase	( YNL192W or YBR038W or YBR023C )	S_Glutamate_metabolism
{'M_cit_c': 1.0, 'M_mal_L_m': 1.0} <==> {'M_mal_L_c': 1.0, 'M_cit_m': 1.0}	R_CITtam	-80272.9	R_citrate_transport__mitochondrial	YBR291C	S_Transport__Mitochondrial
{'M_co2_c': 1.0} <==> {'M_co2_m': 1.0}	R_CO2tm	-14850.8	R_CO2_transport__diffusion___mitochondrial		S_Transport__Mitochondrial
{'M_coa_c': 1.0} <==> {'M_coa_m': 1.0}	R_COAtim	0.013	R_CoA_transporter__mitochondrial___irreversible	YHR002W	S_Transport__Mitochondrial
{'M_o2_c': 1.0, 'M_h_c': 2.0, 'M_cpppg3_c': 1.0} <==> {'M_h2o_c': 2.0, 'M_co2_c': 2.0, 'M_pppg9_c': 1.0}	R_CPPPGO	0.002	R_coproporphyrinogen_oxidase__O2_required_	YDR044W	S_Porphyrin_and_Chlorophyll_Metabolism
{'M_crn_m': 1.0, 'M_acrn_c': 1.0} <==> {'M_acrn_m': 1.0, 'M_crn_c': 1.0}	R_CRNCARtm	0.001	R_carnithine_acetylcarnithine_carrier__mitochondrial	YOR100C	S_Transport__Mitochondrial
{'M_acrn_m': 1.0, 'M_coa_m': 1.0} <==> {'M_crn_m': 1.0, 'M_accoa_m': 1.0}	R_CSNATm	0.001	R_carnitine_O_aceyltransferase__mitochondrial	YML042W	S_Fatty_Acid_Metabolism
{'M_accoa_c': 1.0, 'M_crn_c': 1.0} <==> {'M_coa_c': 1.0, 'M_acrn_c': 1.0}	R_CSNATr	0.001	R_carnitine_O_acetyltransferase	( YAR035W or YER024W )	S_Fatty_Acid_Metabolism
{'M_h2o_c': 1.0, 'M_csn_c': 1.0, 'M_h_c': 1.0} <==> {'M_ura_c': 1.0, 'M_nh4_c': 1.0}	R_CSND	4.798	R_Cytosine_deaminase	YPR062W	S_Purine_and_Pyrimidine_Biosynthesis
{'M_h_e': 1.0, 'M_csn_e': 1.0} <==> {'M_csn_c': 1.0, 'M_h_c': 1.0}	R_CSNt2	4.798	R_cytosine_transport_in_via_proton_symport	( YER056C or YER060W or YER060W-A or YGL186C )	S_Transport__Extracellular
{'M_oaa_m': 1.0, 'M_h2o_m': 1.0, 'M_accoa_m': 1.0} <==> {'M_coa_m': 1.0, 'M_cit_m': 1.0, 'M_h_m': 1.0}	R_CSm	87658.6	R_citrate_synthase	( YNR001C or YPR001W )	S_Citric_Acid_Cycle
{'M_ctp_c': 1.0, 'M_h_c': 2.0, 'M_cmp_m': 1.0} <==> {'M_ctp_m': 1.0, 'M_cmp_c': 1.0, 'M_h_m': 2.0}	R_CTPtm	0.1	R_CTPCMP_antiport	YBR192W	S_Transport__Mitochondrial
{'M_focytc_m': 4.0, 'M_h_m': 6.0, 'M_o2_m': 1.0} <==> {'M_ficytc_m': 4.0, 'M_h_c': 6.0, 'M_h2o_m': 2.0}	R_CYOOm	171495	R_cytochrome_c_oxidase__mitochondrial	( ( ( Q0045 and Q0250 and Q0275 and YDL067C and YGL187C and YGL191W and YHR051W and YLR038C and YLR395C and YMR256C and YNL052W ) and YEL039C ) or ( ( Q0045 and Q0250 and Q0275 and YDL067C and YGL187C and YGL191W and YHR051W and YLR038C and YLR395C and YMR256C and YNL052W ) and YJR048W ) or ( ( Q0045 and Q0250 and Q0275 and YDL067C and YGL187C and YGL191W and YHR051W and YIL111W and YLR038C and Y…	S_Oxidative_Phosphorylation
{'M_ficytc_m': 2.0, 'M_q6h2_m': 1.0, 'M_h_m': 1.5} <==> {'M_h_c': 1.5, 'M_focytc_m': 2.0, 'M_q6_m': 1.0}	R_CYOR_u6m	342990	R_ubiquinol_6_cytochrome_c_reductase	( ( ( Q0105 and YBL045C and YDR529C and YEL024W and YFR033C and YGR183C and YHR001W-A and YJL166W and YOR065W and YPR191W ) and YEL039C ) or ( ( Q0105 and YBL045C and YDR529C and YEL024W and YFR033C and YGR183C and YHR001W-A and YJL166W and YOR065W and YPR191W ) and YJR048W ) )	S_Oxidative_Phosphorylation
{'M_cyst_L_c': 1.0, 'M_h2o_c': 1.0} ---> {'M_nh4_c': 1.0, 'M_2obut_c': 1.0, 'M_cys_L_c': 1.0}	R_CYSTGL	58.466	R_cystathionine_g_lyase	YAL012W	S_Methionine_Metabolism
{'M_ser_L_c': 1.0, 'M_hcys_L_c': 1.0} ---> {'M_cyst_L_c': 1.0, 'M_h2o_c': 1.0}	R_CYSTS	58.466	R_cystathionine_beta_synthase	YGR155W	S_Glycine_and_Serine_Metabolism
{'M_cys_L_e': 1.0, 'M_h_e': 1.0} <==> {'M_h_c': 1.0, 'M_cys_L_c': 1.0}	R_CYSt2r	-45.264	R_L_cysteine_reversible_transport_via_proton_symport	( YKR039W or YDR508C or YBR068C or YDR046C or YBR069C or YOL020W )	S_Transport__Extracellular
{'M_gtp_c': 1.0, 'M_cytd_c': 1.0} ---> {'M_h_c': 1.0, 'M_cmp_c': 1.0, 'M_gdp_c': 1.0}	R_CYTDK2	89.401	R_cytidine_kinase__GTP_	YNR012W	S_Nucleotide_Salvage_Pathway
{'M_cytd_e': 1.0, 'M_h_e': 1.0} ---> {'M_h_c': 1.0, 'M_cytd_c': 1.0}	R_CYTDt2	89.401	R_cytidine_transport_in_via_proton_symport	YAL022C	S_Transport__Extracellular
{'M_atp_c': 1.0, 'M_cmp_c': 1.0} <==> {'M_cdp_c': 1.0, 'M_adp_c': 1.0}	R_CYTK1	35.004	R_cytidylate_kinase__CMP_		S_Nucleotide_Salvage_Pathway
{'M_atp_c': 1.0, 'M_dcmp_c': 1.0} <==> {'M_dcdp_c': 1.0, 'M_adp_c': 1.0}	R_CYTK2	-0.001	R_cytidylate_kinase__dCMP_		S_Nucleotide_Salvage_Pathway
{'M_damp_c': 1.0, 'M_atp_c': 1.0} <==> {'M_adp_c': 1.0, 'M_dadp_c': 1.0}	R_DADK	-7.2	R_deoxyadenylate_kinase		S_Nucleotide_Salvage_Pathway
{'M_cdpchol_c': 1.0, 'M_12dgr_SC_c': 0.01} <==> {'M_h_c': 1.0, 'M_cmp_c': 1.0, 'M_pc_SC_c': 0.01}	R_DAGCPT_SC	0.101	R_diacylglycerol_cholinephosphotransferase__yeast_specific	( YNL130C or YHR123W )	S_Phospholipid_Biosynthesis
{'M_h2o_c': 1.0, 'M_pa_SC_c': 0.01} ---> {'M_pi_c': 1.0, 'M_12dgr_SC_c': 0.01}	R_DAGPYP_SC	13.301	R_diacylglycerol_pyrophosphate_phosphatase__yeast_specific	( YDR503C or YDR284C )	S_Phospholipid_Biosynthesis
{'M_ctp_c': 1.0, 'M_h_c': 1.0, 'M_pa_SC_c': 0.01} <==> {'M_ppi_c': 1.0, 'M_cdpdag_SC_c': 0.01}	R_DASYN_SC	34.8	R_CDP_Diacylglycerol_synthetase__yeast_specific	YBR029C	S_Phospholipid_Biosynthesis
{'M_pa_SC_m': 0.01, 'M_ctp_m': 1.0, 'M_h_m': 1.0} <==> {'M_ppi_m': 1.0, 'M_cdpdag_SC_m': 0.01}	R_DASYNm_SC	0.1	R_CDP_Diacylglycerol_synthetase__yeast_specific__mitochondrial	YBR029C	S_Phospholipid_Biosynthesis
{'M_h2o_c': 1.0, 'M_h_c': 1.0, 'M_dcmp_c': 1.0} <==> {'M_dump_c': 1.0, 'M_nh4_c': 1.0}	R_DCMPDA	-4.799	R_dCMP_deaminase	YHR144C	S_Purine_and_Pyrimidine_Biosynthesis
{'M_e4p_c': 1.0, 'M_h2o_c': 1.0, 'M_pep_c': 1.0} ---> {'M_pi_c': 1.0, 'M_2dda7p_c': 1.0}	R_DDPA	0.003	R_3_deoxy_D_arabino_heptulosonate_7_phosphate_synthetase	( YBR249C or YDR035W )	S_Tyrosine__Tryptophan__and_Phenylalanine_Metabolism
{'M_o2_c': 1.0, 'M_nadph_c': 1.0, 'M_h_c': 1.0, 'M_pmtcoa_c': 1.0} <==> {'M_h2o_c': 2.0, 'M_hdcoa_c': 1.0, 'M_nadp_c': 1.0}	R_DESAT16	19.04	R_Palmitoyl_CoA_desaturase__n_C160CoA___n_C161CoA_	YGL055W	S_Fatty_Acid__Biosynthesis
{'M_o2_c': 1.0, 'M_nadph_c': 1.0, 'M_h_c': 1.0, 'M_stcoa_c': 1.0} <==> {'M_h2o_c': 2.0, 'M_odecoa_c': 1.0, 'M_nadp_c': 1.0}	R_DESAT18	26.88	R_stearoyl_CoA_desaturase__n_C180CoA___n_C181CoA_	YGL055W	S_Fatty_Acid__Biosynthesis
{'M_23dhmp_m': 1.0} ---> {'M_3mop_m': 1.0, 'M_h2o_m': 1.0}	R_DHAD2m	29.232	R_dihydroxy_acid_dehydratase__2_3_dihydroxy_3_methylpentanoate___mitochondrial	YJR016C	S_Valine__Leucine__and_Isoleucine_Metabolism
{'M_dhap_m': 1.0} <==> {'M_dhap_c': 1.0}	R_DHAPtm	49.401	R_dihydroxyacetone_phosphate_transport__mitochondrial		S_Transport__Mitochondrial
{'M_nadph_c': 1.0, 'M_h_c': 1.0, 'M_dhf_c': 1.0} <==> {'M_nadp_c': 1.0, 'M_thf_c': 1.0}	R_DHFRi	0.002	R_dihydrofolate_reductase__irreversible_	YOR236W	S_Folate_Metabolism
{'M_glu_L_c': 1.0, 'M_atp_c': 1.0, 'M_dhpt_c': 1.0} <==> {'M_pi_c': 1.0, 'M_h_c': 1.0, 'M_adp_c': 1.0, 'M_dhf_c': 1.0}	R_DHFS	0.002	R_dihydrofolate_synthase		S_Folate_Metabolism
{'M_dhnpt_m': 1.0} <==> {'M_2ahhmp_m': 1.0, 'M_h_m': 1.0, 'M_gcald_m': 1.0}	R_DHNPAm	0.002	R_dihydroneopterin_aldolase	YNL256W	S_Folate_Metabolism
{'M_dhnpt_c': 1.0} <==> {'M_dhnpt_m': 1.0}	R_DHNPTtm	0.002	R_dhnpt_mitochondrial_transport		S_Transport__Mitochondrial
{'M_o2_c': 1.0, 'M_dhor_S_c': 1.0} <==> {'M_orot_c': 1.0, 'M_h2o2_c': 1.0}	R_DHORDi	119.801	R_dihydoorotic_acid_dehydrogenase__irreversible_	YKL216W	S_Purine_and_Pyrimidine_Biosynthesis
{'M_h2o_c': 1.0, 'M_dhor_S_c': 1.0} <==> {'M_h_c': 1.0, 'M_cbasp_c': 1.0}	R_DHORTS	-119.801	R_dihydroorotase	( YLR420W or YJL130C )	S_Purine_and_Pyrimidine_Biosynthesis
{'M_2ahhmp_m': 1.0, 'M_4abz_m': 1.0} ---> {'M_dhpt_m': 1.0, 'M_h2o_m': 1.0}	R_DHPSm	0.002	R_dihydropteroate_synthase__mitochondrial	YNL256W	S_Folate_Metabolism
{'M_dhpt_c': 1.0} <==> {'M_dhpt_m': 1.0}	R_DHPTtm	-0.002	R_Dihydropteroate_mitochondrial_transport_via_diffusion		S_Transport__Mitochondrial
{'M_2dda7p_c': 1.0} <==> {'M_pi_c': 1.0, 'M_3dhq_c': 1.0}	R_DHQS	0.003	R_3_dehydroquinate_synthase	YDR127W	S_Tyrosine__Tryptophan__and_Phenylalanine_Metabolism
{'M_3dhq_c': 1.0} <==> {'M_h2o_c': 1.0, 'M_3dhsk_c': 1.0}	R_DHQTi	0.003	R_3_dehydroquinate_dehydratase__irreversible	YDR127W	S_Tyrosine__Tryptophan__and_Phenylalanine_Metabolism
{'M_ipdp_c': 1.0, 'M_dmpp_c': 1.0} <==> {'M_ppi_c': 1.0, 'M_grdp_c': 1.0}	R_DMATT	0.002	R_dimethylallyltranstransferase	YJL167W	S_Sterol_Metabolism
{'M_dhpmp_c': 1.0, 'M_h2o_c': 1.0} <==> {'M_pi_c': 1.0, 'M_dhnpt_c': 1.0}	R_DNMPPA	0.002	R_Dihydroneopterin_monophosphate_dephosphorylase	YDL100C	S_Folate_Metabolism
{'M_h2o_c': 1.0, 'M_ahdt_c': 1.0} <==> {'M_dhpmp_c': 1.0, 'M_ppi_c': 1.0, 'M_h_c': 1.0}	R_DNTPPA	0.002	R_Dihydroneopterin_triphosphate_pyrophosphatase		S_Folate_Metabolism
{'M_dolmanp_r': 1.0} <==> {'M_h_r': 1.0, 'M_dolp_r': 1.0, 'M_mannan_r': 1.0}	R_DOLPMMer	1615.8	R_Dolichyl_phosphate_mannose__protein_mannosyltransferase__endoplasmic_reticular	( ( YDL095W and YAL023C ) or YOR321W or YJR143C or YDL093W or YGR199W )	S_Glycoprotein_Metabolism
{'M_gdpmann_c': 1.0, 'M_dolp_c': 1.0} <==> {'M_dolmanp_r': 1.0, 'M_gdp_c': 1.0}	R_DOLPMTcer	1615.8	R_Dolichyl_phosphate_D_mannosyltransferase	YPR183W	S_Glycoprotein_Metabolism
{'M_h_c': 1.0, 'M_dolp_c': 1.0} <==> {'M_h_r': 1.0, 'M_dolp_r': 1.0}	R_DOLPt2er	-1615.8	R_dolichol_phosphate_endoplasmic_reticular_transport_via_proton_symport		S_Transport__Endoplasmic_Reticular
{'M_dpcoa_c': 1.0, 'M_atp_c': 1.0} <==> {'M_h_c': 1.0, 'M_adp_c': 1.0, 'M_coa_c': 1.0}	R_DPCOAK	0.003	R_dephospho_CoA_kinase		S_Pantothenate_and_CoA_Biosynthesis
{'M_5dpmev_c': 1.0, 'M_atp_c': 1.0} <==> {'M_co2_c': 1.0, 'M_adp_c': 1.0, 'M_ipdp_c': 1.0, 'M_pi_c': 1.0}	R_DPMVD	0.012	R_diphosphomevalonate_decarboxylase	YNR043W	S_Sterol_Metabolism
{'M_atp_c': 1.0, 'M_dtmp_c': 1.0} <==> {'M_dtdp_c': 1.0, 'M_adp_c': 1.0}	R_DTMPK	-7.2	R_dTMP_kinase	YJR057W	S_Nucleotide_Salvage_Pathway
{'M_dttp_e': 1.0} <==> {'M_dttp_c': 1.0}	R_DTTPt	7.2	R_dTTP_reversible_uniport		S_Transport__Extracellular
{'M_duri_c': 1.0, 'M_atp_c': 1.0} ---> {'M_dump_c': 1.0, 'M_h_c': 1.0, 'M_adp_c': 1.0}	R_DURIK1	4.798	R_deoxyuridine_kinase__ATPDeoxyuridine_		S_Purine_and_Pyrimidine_Biosynthesis
{'M_duri_c': 1.0, 'M_pi_c': 1.0} <==> {'M_ura_c': 1.0, 'M_2dr1p_c': 1.0}	R_DURIPP	-4.798	R_deoxyuridine_phosphorylase	YLR209C	S_Purine_and_Pyrimidine_Biosynthesis
{'M_h2o_c': 1.0, 'M_dutp_c': 1.0} <==> {'M_dump_c': 1.0, 'M_ppi_c': 1.0, 'M_h_c': 1.0}	R_DUTPDP	0.001	R_dUTP_diphosphatase	YBR252W	S_Purine_and_Pyrimidine_Biosynthesis
{'M_lac_D_e': 1.0, 'M_h_e': 1.0} <==> {'M_lac_D_c': 1.0, 'M_h_c': 1.0}	R_D_LACt2	-0.001	R_D_lactate_transport_via_proton_symport	YKL217W	S_Transport__Extracellular
{'M_epist_e': 1.0} <==> {'M_epist_c': 1.0}	R_EPISTt	234.591	R_episterol_reversible_transport	( YOR011W or YIL013C )	S_Transport__Extracellular
{'M_ergst_e': 1.0} <==> {'M_ergst_c': 1.0}	R_ERGSTt	-255.951	R_ergosterol_reversible_transport	( YIL013C or YOR011W )	S_Transport__Extracellular
{'M_ergst_r': 1.0} <==> {'M_ergst_c': 1.0}	R_ERGSTter	257.351	R_ergosterol_endoplasmic_reticular_transport		S_Transport__Endoplasmic_Reticular
{'M_ergtetrol_c': 1.0} <==> {'M_ergtetrol_r': 1.0}	R_ERGTETROLter	257.351	R_Ergosta_5_6_22_24__28__tetraen_3beta_ol_endoplamic_reticular_transport		S_Transport__Endoplasmic_Reticular
{'M_etoh_e': 1.0} <==> {'M_etoh_c': 1.0}	R_ETOHt	0.001	R_ethanol_reversible_transport		S_Transport__Extracellular
{'M_13BDglcn_e': 1.0} <==> {'M_13BDglcn_b': 1.0}	R_EX_13BDglcn_e_	-5190.34	R_1_3_beta_D_Glucan_exchange		S_
{'M_2mbtoh_e': 1.0} <==> {'M_2mbtoh_b': 1.0}	R_EX_2mbtoh_e_	29.232	R_2_methyl_1_butanol_exchange		S_
{'M_2phetoh_e': 1.0} <==> {'M_2phetoh_b': 1.0}	R_EX_2phetoh_e_	0.001	R_2_phenylethanol_exchange		S_
{'M_4abz_e': 1.0} <==> {'M_4abz_b': 1.0}	R_EX_4abz_e_	-0.002	R_4_Aminobenzoate_exchange		S_
{'M_5aop_e': 1.0} <==> {'M_5aop_b': 1.0}	R_EX_5aop_e_	-0.016	R_5_Amino_4_oxopentanoate_exchange		S_
{'M_Nbfortyr_e': 1.0} <==> {'M_Nbfortyr_b': 1.0}	R_EX_Nbfortyr_e_	0.000999995	R_N_N_bisformyl_dityrosine_exchange		S_
{'M_ac_e': 1.0} <==> {'M_ac_b': 1.0}	R_EX_ac_e_	-84.005	R_Acetate_exchange		S_
{'M_acald_e': 1.0} <==> {'M_acald_b': 1.0}	R_EX_acald_e_	-230735	R_Acetaldehyde_exchange		S_
{'M_ade_e': 1.0} <==> {'M_ade_b': 1.0}	R_EX_ade_e_	-40.745	R_Adenine_exchange		S_
{'M_akg_e': 1.0} <==> {'M_akg_b': 1.0}	R_EX_akg_e_	51126.5	R_2_Oxoglutarate_exchange		S_
{'M_ala_L_e': 1.0} <==> {'M_ala_L_b': 1.0}	R_EX_ala_L_e_	-110278	R_L_Alanine_exchange		S_
{'M_alltn_e': 1.0} <==> {'M_alltn_b': 1.0}	R_EX_alltn_e_	-29087.8	R_Allantoin_exchange		S_
{'M_alltt_e': 1.0} <==> {'M_alltt_b': 1.0}	R_EX_alltt_e_	-0.001	R_Allantoate_exchange		S_
{'M_amet_e': 1.0} <==> {'M_amet_b': 1.0}	R_EX_amet_e_	-58.466	R_S_Adenosyl_L_methionine_exchange		S_
{'M_arg_L_e': 1.0} <==> {'M_arg_L_b': 1.0}	R_EX_arg_L_e_	-321.4	R_L_Arginine_exchange		S_
{'M_asp_L_e': 1.0} <==> {'M_asp_L_b': 1.0}	R_EX_asp_L_e_	173578	R_L_Aspartate_exchange		S_
{'M_btd_RR_e': 1.0} <==> {'M_btd_RR_b': 1.0}	R_EX_btd_RR_e_	71538.1	R__R_R__2_3_Butanediol_exchange		S_
{'M_csn_e': 1.0} <==> {'M_csn_b': 1.0}	R_EX_csn_e_	-4.798	R_Cytosine_exchange		S_
{'M_cys_L_e': 1.0} <==> {'M_cys_L_b': 1.0}	R_EX_cys_L_e_	45.264	R_L_Cysteine_exchange		S_
{'M_cytd_e': 1.0} <==> {'M_cytd_b': 1.0}	R_EX_cytd_e_	-89.401	R_Cytidine_exchange		S_
{'M_dca_e': 1.0} <==> {'M_dca_b': 1.0}	R_EX_dca_e_	2.24	R_Decanoate__n_C100__exchange		S_
{'M_ddca_e': 1.0} <==> {'M_ddca_b': 1.0}	R_EX_ddca_e_	6.72	R_Dodecanoate__n_C120__exchange		S_
{'M_dttp_e': 1.0} <==> {'M_dttp_b': 1.0}	R_EX_dttp_e_	-7.2	R_dTTP_exchange		S_
{'M_epist_e': 1.0} <==> {'M_epist_b': 1.0}	R_EX_epist_e_	-234.591	R_episterol_exchange		S_
{'M_ergst_e': 1.0} <==> {'M_ergst_b': 1.0}	R_EX_ergst_e_	255.951	R_Ergosterol_exchange		S_
{'M_etoh_e': 1.0} <==> {'M_etoh_b': 1.0}	R_EX_etoh_e_	-0.001	R_Ethanol_exchange		S_
{'M_fe2_e': 1.0} <==> {'M_fe2_b': 1.0}	R_EX_fe2_e_	-0.002	R_Fe2_exchange		S_
{'M_fru_e': 1.0} <==> {'M_fru_b': 1.0}	R_EX_fru_e_	-0.001	R_D_Fructose_exchange		S_
{'M_g3pi_e': 1.0} <==> {'M_g3pi_b': 1.0}	R_EX_g3pi_e_	55.9	R_sn_Glycero_3_phospho_1_inositol_exchange		S_
{'M_gal_e': 1.0} <==> {'M_gal_b': 1.0}	R_EX_gal_e_	-0.001	R_D_Galactose_exchange		S_
{'M_gcald_e': 1.0} <==> {'M_gcald_b': 1.0}	R_EX_gcald_e_	0.002	R_Glycolaldehyde_exchange		S_
{'M_gln_L_e': 1.0} <==> {'M_gln_L_b': 1.0}	R_EX_gln_L_e_	-534.005	R_L_Glutamine_exchange		S_
{'M_glu_L_e': 1.0} <==> {'M_glu_L_b': 1.0}	R_EX_glu_L_e_	-116542	R_L_Glutamate_exchange		S_
{'M_gly_e': 1.0} <==> {'M_gly_b': 1.0}	R_EX_gly_e_	108780	R_Glycine_exchange		S_
{'M_glyc_e': 1.0} <==> {'M_glyc_b': 1.0}	R_EX_glyc_e_	-49.302	R_Glycerol_exchange		S_
{'M_gthox_e': 1.0} <==> {'M_gthox_b': 1.0}	R_EX_gthox_e_	-0.001	R_Oxidized_glutathione_exchange		S_
{'M_gua_e': 1.0} <==> {'M_gua_b': 1.0}	R_EX_gua_e_	-96.802	R_Guanine_exchange		S_
{'M_h_e': 1.0} <==> {'M_h_b': 1.0}	R_EX_h_e_	161853	R_H_exchange		S_
{'M_hdcea_e': 1.0} <==> {'M_hdcea_b': 1.0}	R_EX_hdcea_e_	1706.32	R_hexadecenoate__n_C161__exchange		S_
{'M_hexc_e': 1.0} <==> {'M_hexc_b': 1.0}	R_EX_hexc_e_	25.76	R_hexacosanoate__n_C260__exchange		S_
{'M_his_L_e': 1.0} <==> {'M_his_L_b': 1.0}	R_EX_his_L_e_	-132.6	R_L_Histidine_exchange		S_
{'M_iamac_e': 1.0} <==> {'M_iamac_b': 1.0}	R_EX_iamac_e_	0.001	R_isoamyl_acetate_exchange		S_
{'M_ibutac_e': 1.0} <==> {'M_ibutac_b': 1.0}	R_EX_ibutac_e_	0.001	R_isobutyl_acetate_exchange		S_
{'M_ile_L_e': 1.0} <==> {'M_ile_L_b': 1.0}	R_EX_ile_L_e_	-385.4	R_L_Isoleucine_exchange		S_
{'M_lac_D_e': 1.0} <==> {'M_lac_D_b': 1.0}	R_EX_lac_D_e_	0.001	R_D_lactate_exchange		S_
{'M_lac_L_e': 1.0} <==> {'M_lac_L_b': 1.0}	R_EX_lac_L_e_	-0.001	R_L_Lactate_exchange		S_
{'M_leu_L_e': 1.0} <==> {'M_leu_L_b': 1.0}	R_EX_leu_L_e_	-592.801	R_L_Leucine_exchange		S_
{'M_lys_L_e': 1.0} <==> {'M_lys_L_b': 1.0}	R_EX_lys_L_e_	-572.398	R_L_Lysine_exchange		S_
{'M_malt_e': 1.0} <==> {'M_malt_b': 1.0}	R_EX_malt_e_	-0.001	R_Maltose_exchange		S_
{'M_man_e': 1.0} <==> {'M_man_b': 1.0}	R_EX_man_e_	-0.001	R_D_Mannose_exchange		S_
{'M_met_L_e': 1.0} <==> {'M_met_L_b': 1.0}	R_EX_met_L_e_	-101.4	R_L_Methionine_exchange		S_
{'M_nadp_e': 1.0} <==> {'M_nadp_b': 1.0}	R_EX_nadp_e_	0.001	R_Nicotinamide_adenine_dinucleotide_phosphate_exchange		S_
{'M_nmn_e': 1.0} <==> {'M_nmn_b': 1.0}	R_EX_nmn_e_	-0.002	R_NMN_exchange		S_
{'M_o2_e': 1.0} <==> {'M_o2_b': 1.0}	R_EX_o2_e_	-172093	R_O2_exchange		S_
{'M_ocdca_e': 1.0} <==> {'M_ocdca_b': 1.0}	R_EX_ocdca_e_	82.88	R_octadecanoate__n_C180__exchange		S_
{'M_ocdcea_e': 1.0} <==> {'M_ocdcea_b': 1.0}	R_EX_ocdcea_e_	722.4	R_octadecenoate__n_C181__exchange		S_
{'M_pap_e': 1.0} <==> {'M_pap_b': 1.0}	R_EX_pap_e_	0.002	R_Adenosine_3__5__bisphosphate_exchange		S_
{'M_pc_SC_e': 1.0} <==> {'M_pc_SC_b': 1.0}	R_EX_pc_SC_e_	-0.001	R_Phosphatidylcholine__yeast_specific_exchange		S_
{'M_phe_L_e': 1.0} <==> {'M_phe_L_b': 1.0}	R_EX_phe_L_e_	-267.801	R_L_Phenylalanine_exchange		S_
{'M_pi_e': 1.0} <==> {'M_pi_b': 1.0}	R_EX_pi_e_	-373.727	R_Phosphate_exchange		S_
{'M_pnto_R_e': 1.0} <==> {'M_pnto_R_b': 1.0}	R_EX_pnto_R_e_	-0.002	R__R__Pantothenate_exchange		S_
{'M_pro_L_e': 1.0} <==> {'M_pro_L_b': 1.0}	R_EX_pro_L_e_	-329.401	R_L_Proline_exchange		S_
{'M_ptd1ino_SC_e': 1.0} <==> {'M_ptd1ino_SC_b': 1.0}	R_EX_ptd1ino_SC_e_	-0.559	R_phosphatidyl_1D_myo_inositol__yeast_specific_exchange		S_
{'M_pyr_e': 1.0} <==> {'M_pyr_b': 1.0}	R_EX_pyr_e_	-0.001	R_Pyruvate_exchange		S_
{'M_ribflv_e': 1.0} <==> {'M_ribflv_b': 1.0}	R_EX_ribflv_e_	-1.982	R_Riboflavin_exchange		S_
{'M_ser_L_e': 1.0} <==> {'M_ser_L_b': 1.0}	R_EX_ser_L_e_	-453.466	R_L_Serine_exchange		S_
{'M_so3_e': 1.0} <==> {'M_so3_b': 1.0}	R_EX_so3_e_	0.001	R_Sulfite_exchange		S_
{'M_so4_e': 1.0} <==> {'M_so4_b': 1.0}	R_EX_so4_e_	-40.001	R_Sulfate_exchange		S_
{'M_thm_e': 1.0} <==> {'M_thm_b': 1.0}	R_EX_thm_e_	-0.002	R_Thiamin_exchange		S_
{'M_thr_L_e': 1.0} <==> {'M_thr_L_b': 1.0}	R_EX_thr_L_e_	-382.8	R_L_Threonine_exchange		S_
{'M_thym_e': 1.0} <==> {'M_thym_b': 1.0}	R_EX_thym_e_	4.798	R_Thymine_exchange		S_
{'M_thymd_e': 1.0} <==> {'M_thymd_b': 1.0}	R_EX_thymd_e_	-4.798	R_Thymidine_exchange		S_
{'M_tre_e': 1.0} <==> {'M_tre_b': 1.0}	R_EX_tre_e_	-46.801	R_Trehalose_exchange		S_
{'M_trp_L_e': 1.0} <==> {'M_trp_L_b': 1.0}	R_EX_trp_L_e_	-56.801	R_L_Tryptophan_exchange		S_
{'M_ttdca_e': 1.0} <==> {'M_ttdca_b': 1.0}	R_EX_ttdca_e_	38.64	R_tetradecanoate__n_C140__exchange		S_
{'M_tyr_L_e': 1.0} <==> {'M_tyr_L_b': 1.0}	R_EX_tyr_L_e_	-204.001	R_L_Tyrosine_exchange		S_
{'M_urea_e': 1.0} <==> {'M_urea_b': 1.0}	R_EX_urea_e_	29087.8	R_Urea_exchange		S_
{'M_val_L_e': 1.0} <==> {'M_val_L_b': 1.0}	R_EX_val_L_e_	-529.201	R_L_Valine_exchange		S_
{'M_xyl_D_e': 1.0} <==> {'M_xyl_D_b': 1.0}	R_EX_xyl_D_e_	-0.001	R_D_Xylose_exchange		S_
{'M_zymstest_SC_e': 1.0} <==> {'M_zymstest_SC_b': 1.0}	R_EX_zymstest_SC_e_	-25.76	R_zymosterol_ester__yeast_specific_exchange		S_
{'M_ttdca_c': 1.0, 'M_atp_c': 1.0, 'M_coa_c': 1.0} <==> {'M_ppi_c': 1.0, 'M_tdcoa_c': 1.0, 'M_amp_c': 1.0}	R_FACOAL140	11.2	R_fatty_acid__CoA_ligase__tetradecanoate_	( YOR317W or YIL009W or YMR246W )	S_Fatty_Acid__Biosynthesis
{'M_hdca_c': 1.0, 'M_atp_c': 1.0, 'M_coa_c': 1.0} <==> {'M_ppi_c': 1.0, 'M_pmtcoa_c': 1.0, 'M_amp_c': 1.0}	R_FACOAL160	49.28	R_fatty_acid__CoA_ligase__hexadecanoate_	( YOR317W or YIL009W or YMR246W )	S_Fatty_Acid__Biosynthesis
{'M_ocdca_c': 1.0, 'M_atp_c': 1.0, 'M_coa_c': 1.0} <==> {'M_ppi_c': 1.0, 'M_stcoa_c': 1.0, 'M_amp_c': 1.0}	R_FACOAL180	32.48	R_fatty_acid__CoA_ligase__octadecanoate_	( YOR317W or YIL009W or YMR246W )	S_Fatty_Acid__Biosynthesis
{'M_atp_c': 1.0, 'M_coa_c': 1.0, 'M_ocdcya_c': 1.0} <==> {'M_ppi_c': 1.0, 'M_ocdycacoa_c': 1.0, 'M_amp_c': 1.0}	R_FACOAL182	10.08	R_fatty_acid__CoA_ligase__octadecynoate_	( YOR317W or YMR246W or YIL009W )	S_Fatty_Acid__Biosynthesis
{'M_malcoa_c': 1.0, 'M_nadph_c': 2.0, 'M_h_c': 3.0, 'M_occoa_c': 1.0} <==> {'M_h2o_c': 1.0, 'M_co2_c': 1.0, 'M_nadp_c': 2.0, 'M_coa_c': 1.0, 'M_dcacoa_c': 1.0}	R_FAS100COA	8.96	R_fatty_acyl_CoA_synthase__n_C100CoA_	( YGR037C and YNR016C and ( YKL182W and YPL231W ) )	S_Fatty_Acid__Biosynthesis
{'M_malcoa_c': 1.0, 'M_nadph_c': 2.0, 'M_h_c': 3.0, 'M_dcacoa_c': 1.0} <==> {'M_h2o_c': 1.0, 'M_co2_c': 1.0, 'M_ddcacoa_c': 1.0, 'M_nadp_c': 2.0, 'M_coa_c': 1.0}	R_FAS120COA	6.72	R_fatty_acyl_CoA_synthase__n_C120CoA_	( YGR037C and YNR016C and ( YKL182W and YPL231W ) )	S_Fatty_Acid__Biosynthesis
{'M_malcoa_c': 1.0, 'M_hdca_c': 1.0, 'M_h_c': 3.0, 'M_nadph_c': 2.0} ---> {'M_h2o_c': 1.0, 'M_co2_c': 1.0, 'M_nadp_c': 2.0, 'M_coa_c': 1.0, 'M_ocdca_c': 1.0}	R_FAS180	32.48	R_fatty_acid_synthase__n_C180_	( YGR037C and YNR016C and ( YKL182W and YPL231W ) )	S_Fatty_Acid__Biosynthesis
{'M_accoa_c': 1.0, 'M_malcoa_c': 3.0, 'M_nadph_c': 6.0, 'M_h_c': 9.0} <==> {'M_h2o_c': 3.0, 'M_co2_c': 3.0, 'M_occoa_c': 1.0, 'M_nadp_c': 6.0, 'M_coa_c': 3.0}	R_FAS80COA_L	8.96	R_fatty_acyl_CoA_synthase__n_C80CoA___lumped_reaction	( YGR037C and YNR016C and ( YKL182W and YPL231W ) )	S_Fatty_Acid__Biosynthesis
{'M_ppp9_m': 1.0, 'M_fe2_m': 1.0} <==> {'M_h_m': 2.0, 'M_pheme_m': 1.0}	R_FCLTm	0.002	R_Ferrochelatase__mitochondrial	YOR176W	S_Porphyrin_and_Chlorophyll_Metabolism
{'M_nad_c': 1.0, 'M_for_c': 1.0} <==> {'M_co2_c': 1.0, 'M_nadh_c': 1.0}	R_FDH	0.001	R_formate_dehydrogenase	( YOR388C or YPL275W or YPL276W )	S_Methane_Metabolism
{'M_fe2_e': 1.0} <==> {'M_fe2_c': 1.0}	R_FE2t	0.002	R_iron__II__transport	YMR319C	S_Transport__Extracellular
{'M_fe2_c': 1.0} <==> {'M_fe2_m': 1.0}	R_FE2utm	0.002	R_iron__II__uptake__mitochondrial_		S_Transport__Mitochondrial
{'M_h2o_c': 1.0, 'M_Lfmkynr_c': 1.0} <==> {'M_for_c': 1.0, 'M_h_c': 1.0, 'M_Lkynr_c': 1.0}	R_FKYNH	0.001	R_N_Formyl_L_kynurenine_amidohydrolase	YDR428C	S_Tyrosine__Tryptophan__and_Phenylalanine_Metabolism
{'M_h_c': 1.0, 'M_atp_c': 1.0, 'M_fmn_c': 1.0} <==> {'M_ppi_c': 1.0, 'M_fad_c': 1.0}	R_FMNAT	0.002	R_FMN_adenylyltransferase	YDL045C	S_Riboflavin_Metabolism
{'M_frdp_c': 1.0, 'M_ipdp_c': 1.0} <==> {'M_ppi_c': 1.0, 'M_ggdp_c': 1.0}	R_FRTT	0.002	R_farnesyltranstransferase	YPL069C	S_Sterol_Metabolism
{'M_fru_e': 1.0, 'M_h_e': 1.0} <==> {'M_h_c': 1.0, 'M_fru_c': 1.0}	R_FRUt2	0.001	R_D_fructose_transport_in_via_proton_symport	( YHR094C or YFL011W or YOL156W or YEL069C or YDL245C or YJR158W or YNR072W or YMR011W or YDR345C or YHR092C or YHR096C or YDR343C or YDR342C or YJL214W or YJL219W )	S_Transport__Extracellular
{'M_for_c': 1.0, 'M_atp_c': 1.0, 'M_thf_c': 1.0} ---> {'M_pi_c': 1.0, 'M_adp_c': 1.0, 'M_10fthf_c': 1.0}	R_FTHFLi	0.00199999	R_formate_tetrahydrofolate_ligase	YGR204W	S_Folate_Metabolism
{'M_h2o_c': 1.0, 'M_fum_c': 1.0} <==> {'M_mal_L_c': 1.0}	R_FUM	145408	R_fumarase	YPL262W	S_Oxidative_Phosphorylation
{'M_h2o_m': 1.0, 'M_fum_m': 1.0} <==> {'M_mal_L_m': 1.0}	R_FUMm	7414.92	R_fumarase__mitochondrial	YPL262W	S_Oxidative_Phosphorylation
{'M_g3pc_e': 1.0} <==> {'M_g3pc_c': 1.0}	R_G3PCt	0.1	R_glycero_3_phosphocholine_transport__extracellular_to_cytosol_	YCR098C	S_Transport__Extracellular
{'M_fad_m': 1.0, 'M_glyc3p_m': 1.0} <==> {'M_fadh2_m': 1.0, 'M_dhap_m': 1.0}	R_G3PDm	49.401	R_glycerol_3_phosphate_dehydrogenase__FAD___mitochondrial	YIL155C	S_Glycerolipid_Metabolism
{'M_glyc3p_c': 1.0, 'M_h2o_c': 1.0} <==> {'M_pi_c': 1.0, 'M_glyc_c': 1.0}	R_G3PT	0.001	R_glycerol_3_phosphatase	( YER062C or YIL053W )	S_Glycerolipid_Metabolism
{'M_glu5sa_m': 1.0} <==> {'M_1pyr5c_m': 1.0, 'M_h_m': 1.0, 'M_h2o_m': 1.0}	R_G5SADrm	-0.001	R_L_glutamate_5_semialdehyde_dehydratase__reversible__mitochondrial		S_Arginine_and_Proline_Metabolism
{'M_g6p_r': 1.0, 'M_nadp_r': 1.0} <==> {'M_h_r': 1.0, 'M_nadph_r': 1.0, 'M_6pgl_r': 1.0}	R_G6PDH2er	257.351	R_glucose_6_phosphate_dehydrogenase__endoplasmic_reticulum		S_Pentose_Phosphate_Pathway
{'M_g6p_B_c': 1.0} <==> {'M_f6p_c': 1.0}	R_G6PI3	1615.8	R_Glucose_6_phosphate_isomerase	YBR196C	S_GlycolysisGluconeogenesis
{'M_g6p_c': 1.0} <==> {'M_g6p_r': 1.0}	R_G6Pter	257.351	R_glucose_6_phosphate_endoplasmic_reticular_transport_via_diffusion		S_Transport__Endoplasmic_Reticular
{'M_gal_c': 1.0, 'M_atp_c': 1.0} <==> {'M_gal1p_c': 1.0, 'M_h_c': 1.0, 'M_adp_c': 1.0}	R_GALK	0.001	R_galactokinase	YBR020W	S_Galactose_metabolism
{'M_gal1p_c': 1.0, 'M_utp_c': 1.0, 'M_h_c': 1.0} <==> {'M_ppi_c': 1.0, 'M_udpgal_c': 1.0}	R_GALT	0.001	R_galactose_1_phosphate_uridylyltransferase	YBR018C	S_Galactose_metabolism
{'M_utp_c': 1.0, 'M_h_c': 1.0, 'M_g1p_c': 1.0} <==> {'M_ppi_c': 1.0, 'M_udpg_c': 1.0}	R_GALU	3306.6	R_UTP_glucose_1_phosphate_uridylyltransferase	( YKL035W or YHL012W )	S_Galactose_metabolism
{'M_h_e': 1.0, 'M_gal_e': 1.0} <==> {'M_gal_c': 1.0, 'M_h_c': 1.0}	R_GALt2	0.001	R_D_galactose_transport_in_via_proton_symport	( YLR081W or YFL011W or YOL156W or YNL318C or YJL219W or YDR536W )	S_Transport__Extracellular
{'M_ddcacoa_c': 0.059999999999999998, 'M_dcacoa_c': 0.02, 'M_tdcoa_c': 0.10000000000000001, 'M_ocdycacoa_c': 0.089999999999999997, 'M_pmtcoa_c': 0.27000000000000002, 'M_hdcoa_c': 0.17000000000000001, 'M_stcoa_c': 0.050000000000000003, 'M_glyc3p_c': 1.0, 'M_odecoa_c': 0.23999999999999999} <==> {'M_1ag3p_SC_c': 0.01, 'M_coa_c': 1.0}	R_GAT1_SC	0.001	R_glycerol_3_phosphate_acyltransferase__glycerol_3_phosphate___yeast_specific	( YKR067W or YBL011W )	S_Phospholipid_Biosynthesis
{'M_ddcacoa_c': 0.059999999999999998, 'M_dcacoa_c': 0.02, 'M_tdcoa_c': 0.10000000000000001, 'M_ocdycacoa_c': 0.089999999999999997, 'M_pmtcoa_c': 0.27000000000000002, 'M_dhap_c': 1.0, 'M_hdcoa_c': 0.17000000000000001, 'M_stcoa_c': 0.050000000000000003, 'M_odecoa_c': 0.23999999999999999} <==> {'M_coa_c': 1.0, 'M_1agly3p_SC_c': 0.01}	R_GAT2_SC	49.399	R_glycerol_3_phosphate_acyltransferase__glycerone_phosphate___yeast_specific	( YKR067W or YBL011W )	S_Phospholipid_Biosynthesis
{'M_14glun_c': 1.0} <==> {'M_glycogen_c': 1.0, 'M_h2o_c': 1.0}	R_GBEZ	0.001	R_1_4_alpha_glucan_branching_enzyme	YEL011W	S_Alternate_Carbon_Metabolism
{'M_gcald_e': 1.0} <==> {'M_gcald_c': 1.0}	R_GCALDt	-0.002	R_Glycoaldehydye_reversible_transport		S_Transport__Extracellular
{'M_gcald_c': 1.0} <==> {'M_gcald_m': 1.0}	R_GCALDtm	-0.002	R_glycoaldehyde_mitochondrial_transport		S_Transport__Mitochondrial
{'M_gln_L_c': 1.0, 'M_f6p_c': 1.0} ---> {'M_glu_L_c': 1.0, 'M_gam6p_c': 1.0}	R_GF6PTA	0.002	R_glutamine_fructose_6_phosphate_transaminase	( YMR085W or YKL104C or YMR084W )	S_Glutamine_Metabolism
{'M_ggdp_c': 1.0, 'M_ipdp_c': 1.0} <==> {'M_ppi_c': 1.0, 'M_pendp_c': 1.0}	R_GGTT	0.002	R_geranylgeranyltranstransferase		S_Quinone_Biosynthesis
{'M_thf_m': 1.0, 'M_ser_L_m': 1.0} <==> {'M_gly_m': 1.0, 'M_mlthf_m': 1.0, 'M_h2o_m': 1.0}	R_GHMT2rm	-0.1	R_glycine_hydroxymethyltransferase__reversible__mitochondrial	YBR263W	S_Glycine_and_Serine_Metabolism
{'M_gmp_c': 1.0, 'M_atp_c': 1.0} <==> {'M_adp_c': 1.0, 'M_gdp_c': 1.0}	R_GK1	4.802	R_guanylate_kinase__GMPATP_	YDR454C	S_Purine_and_Pyrimidine_Biosynthesis
{'M_glycogen_v': 1.0, 'M_h2o_v': 1.0} <==> {'M_glc_D_v': 1.0}	R_GLCGSDv	0.000999962	R_glucan_1_4_alpha_glucosidase__vacuole	YIL099W	S_Alternate_Carbon_Metabolism
{'M_glycogen_c': 1.0} <==> {'M_glycogen_v': 1.0}	R_GLCNtv	0.000999962	R_Glycogen_vacuolar__transport__via_autophagy		S_Transport__Vacuolar
{'M_udpg_c': 1.0} <==> {'M_glycogen_c': 1.0, 'M_udp_c': 1.0, 'M_h_c': 1.0}	R_GLCS2	1037	R_glycogen_synthase__UDPGlc_	( ( YKR058W and YLR258W ) or ( YKR058W and YFR015C ) or ( YJL137C and YFR015C ) or ( YJL137C and YLR258W ) )	S_Alternate_Carbon_Metabolism
{'M_glc_D_e': 1.0} <==> {'M_glc_D_c': 1.0}	R_GLCt1	5190.34	R_glucose_transport__uniport_	( YHR092C or YLR081W or YOL156W or YDR536W or YHR094C or YEL069C or YDL245C or YJR158W or YFL011W or YNR072W or YMR011W or YDR345C or YHR096C or YDR343C or YDR342C or YJL214W or YJL219W )	S_Transport__Extracellular
{'M_glc_D_c': 1.0} <==> {'M_glc_D_v': 1.0}	R_GLCtv	-0.00299996	R_glucose_transport__vacuolar		S_Transport__Vacuolar
{'M_gln_L_e': 1.0, 'M_h_e': 1.0} <==> {'M_h_c': 1.0, 'M_gln_L_c': 1.0}	R_GLNt2r	534.005	R_L_glutamine_reversible_transport_via_proton_symport	( YKR039W or YCL025C or YDR508C or YPL265W )	S_Transport__Extracellular
{'M_glu_L_c': 1.0, 'M_h_c': 1.0} <==> {'M_4abut_c': 1.0, 'M_co2_c': 1.0}	R_GLUDC	65135.4	R_Glutamate_Decarboxylase	YMR250W	S_Glutamate_metabolism
{'M_glu_L_c': 1.0, 'M_h2o_c': 1.0, 'M_nad_c': 1.0} <==> {'M_akg_c': 1.0, 'M_h_c': 1.0, 'M_nadh_c': 1.0, 'M_nh4_c': 1.0}	R_GLUDxi	6431.97	R_glutamate_dehydrogenase__NAD_	YDL215C	S_Glutamate_metabolism
{'M_akg_c': 1.0, 'M_h_c': 1.0, 'M_nadph_c': 1.0, 'M_nh4_c': 1.0} <==> {'M_glu_L_c': 1.0, 'M_h2o_c': 1.0, 'M_nadp_c': 1.0}	R_GLUDyi	64666.1	R_glutamate_dehydrogenase__NADP_	( YOR375C or YAL062W )	S_Glutamate_metabolism
{'M_atp_c': 1.0, 'M_glc_D_c': 1.0} <==> {'M_h_c': 1.0, 'M_adp_c': 1.0, 'M_g6p_B_c': 1.0}	R_GLUK	1615.8	R_Glucokinase	YCL040W	S_GlycolysisGluconeogenesis
{'M_h_e': 1.0, 'M_glu_L_e': 1.0} <==> {'M_glu_L_c': 1.0, 'M_h_c': 1.0}	R_GLUt2r	116542	R_L_glutamate_transport_via_proton_symport__reversible	( YFL055W or YDR536W or YKR039W or YCL025C or YPL265W )	S_Transport__Extracellular
{'M_glu_L_c': 1.0, 'M_oh1_m': 1.0} <==> {'M_oh1_c': 1.0, 'M_glu_L_m': 1.0}	R_GLUt5m	0.001	R_L_glutamate_transport_into_mitochondria_via_hydroxide_ion_antiport		S_Transport__Mitochondrial
{'M_glyc3p_c': 1.0} <==> {'M_glyc3p_m': 1.0}	R_GLYC3Ptm	49.401	R_glycerol_3_phosphate_shuttle		S_Transport__Mitochondrial
{'M_gly_m': 1.0, 'M_nad_m': 1.0, 'M_thf_m': 1.0} ---> {'M_nh4_m': 1.0, 'M_nadh_m': 1.0, 'M_mlthf_m': 1.0, 'M_co2_m': 1.0}	R_GLYCLm	0.1	R_glycine_cleavage_system__mitochondrial	( YDR019C and YMR189W and YAL044C and YFL018C )	S_Glycine_and_Serine_Metabolism
{'M_glyc_e': 1.0, 'M_h_e': 1.0} <==> {'M_h_c': 1.0, 'M_glyc_c': 1.0}	R_GLYCt2	49.302	R_glycerol_transport_via_symport	( YGL084C or YPL189W )	S_Transport__Extracellular
{'M_h2o_c': 1.0, 'M_udpg_c': 1.0} <==> {'M_udp_c': 1.0, 'M_h_c': 1.0, 'M_14glun_c': 1.0}	R_GLYGS	0.001	R_glycogen__starch__synthase	( ( YKR058W and YFR015C ) or ( YJL137C and YFR015C ) or ( YKR058W and YLR258W ) or ( YJL137C and YLR258W ) )	S_Alternate_Carbon_Metabolism
{'M_glyc_c': 1.0, 'M_atp_c': 1.0} <==> {'M_glyc3p_c': 1.0, 'M_h_c': 1.0, 'M_adp_c': 1.0}	R_GLYK	49.303	R_glycerol_kinase	YHL032C	S_Glycerolipid_Metabolism
{'M_h2o_c': 1.0, 'M_lgt_S_c': 1.0} <==> {'M_gthrd_c': 1.0, 'M_h_c': 1.0, 'M_lac_D_c': 1.0}	R_GLYOX	0.001	R_hydroxyacylglutathione_hydrolase	YDR272W	S_Alternate_Carbon_Metabolism
{'M_h_c': 1.0, 'M_gly_c': 1.0} <==> {'M_gly_m': 1.0, 'M_h_m': 1.0}	R_GLYt2m	0.2	R_glycine_mitochondrial_transport_via_proton_symport		S_Transport__Mitochondrial
{'M_gly_e': 1.0, 'M_h_e': 1.0} <==> {'M_h_c': 1.0, 'M_gly_c': 1.0}	R_GLYt2r	-108780	R_glycine_reversible_transport_via_proton_symport	( YKR039W or YOL020W or YPL265W or YOR348C )	S_Transport__Extracellular
{'M_nadp_c': 1.0, 'M_6pgc_c': 1.0} <==> {'M_co2_c': 1.0, 'M_nadph_c': 1.0, 'M_ru5p_D_c': 1.0}	R_GND	257.351	R_phosphogluconate_dehydrogenase	( YGR256W or YHR183W )	S_Pentose_Phosphate_Pathway
{'M_h2o_c': 1.0, 'M_g3pc_c': 1.0} <==> {'M_glyc3p_c': 1.0, 'M_h_c': 1.0, 'M_chol_c': 1.0}	R_GPDDA1	0.1	R_Glycerophosphodiester_phosphodiesterase__Glycerophosphocholine_	YPL110C	S_Glycerolipid_Metabolism
{'M_grdp_c': 1.0, 'M_ipdp_c': 1.0} <==> {'M_ppi_c': 1.0, 'M_frdp_c': 1.0}	R_GRTT	0.002	R_geranyltranstransferase	YJL167W	S_Sterol_Metabolism
{'M_atp_c': 1.0, 'M_gsn_c': 1.0} <==> {'M_gmp_c': 1.0, 'M_h_c': 1.0, 'M_adp_c': 1.0}	R_GSNK	96.802	R_guanosine_kinase		S_Nucleotide_Salvage_Pathway
{'M_gthox_c': 1.0, 'M_nadph_c': 1.0, 'M_h_c': 1.0} <==> {'M_gthrd_c': 2.0, 'M_nadp_c': 1.0}	R_GTHO	0.002	R_glutathione_oxidoreductase	( ( YPL091W and YDR513W ) or ( YPL091W and YCL035C ) or ( YPL091W and YDR098C ) or ( YPL091W and YER174C ) )	S_Other_Amino_Acid_Metabolism
{'M_gthox_e': 1.0} ---> {'M_gthox_c': 1.0}	R_GTHOXti	0.001	R_oxidized_glutathione_irreversible_uniport		S_Transport__Extracellular
{'M_gthrd_c': 2.0, 'M_h2o2_c': 1.0} <==> {'M_h2o_c': 2.0, 'M_gthox_c': 1.0}	R_GTHP	0.001	R_glutathione_peridoxase	( YDR513W or YCL035C or YBR244W or YIR037W or YKL026C )	S_Other_Amino_Acid_Metabolism
{'M_h2o_c': 1.0, 'M_gtp_c': 1.0} <==> {'M_ahdt_c': 1.0, 'M_h_c': 1.0, 'M_for_c': 1.0}	R_GTPCI	0.002	R_GTP_cyclohydrolase_I	YGR267C	S_Folate_Metabolism
{'M_h_e': 1.0, 'M_gua_e': 1.0} <==> {'M_gua_c': 1.0, 'M_h_c': 1.0}	R_GUAt2r	96.802	R_guanine_reversible_transport_via_proton_symport	( YER056C or YER060W or YER060W-A or YGL186C )	S_Transport__Extracellular
{'M_h2o_e': 1.0} <==> {'M_h2o_c': 1.0}	R_H2Ot	-7878.35	R_H2O_transport_via_diffusion	( YPR192W or YLL052C )	S_Transport__Extracellular
{'M_h2o_c': 1.0} <==> {'M_h2o_m': 1.0}	R_H2Otm	-480391	R_H2O_transport__mitochondrial		S_Transport__Mitochondrial
{'M_h2o_c': 1.0} <==> {'M_h2o_v': 1.0}	R_H2Otv	0.00199996	R_H2O_transport__vacuolar		S_Transport__Vacuolar
{'M_b124tc_m': 1.0, 'M_h2o_m': 1.0} <==> {'M_hicit_m': 1.0}	R_HACNHm	0.002	R_homoacontinate_hydratase__mitochondrial	YDR234W	S_Threonine_and_Lysine_Metabolism
{'M_4hbz_m': 1.0, 'M_hexdp_m': 1.0} <==> {'M_3ophb_5_m': 1.0, 'M_ppi_m': 1.0}	R_HBZOPT6m	0.002	R_Hydroxybenzoate_octaprenyltransferase__mitochondrial	YNR041C	S_Quinone_Biosynthesis
{'M_akg_m': 1.0, 'M_h2o_m': 1.0, 'M_accoa_m': 1.0} <==> {'M_coa_m': 1.0, 'M_hcit_m': 1.0, 'M_h_m': 1.0}	R_HCITSm	0.002	R_homocitrate_synthase		S_Pyruvate_Metabolism
{'M_h2o_c': 1.0, 'M_co2_c': 1.0} <==> {'M_h_c': 1.0, 'M_hco3_c': 1.0}	R_HCO3E	109556	R_HCO3_equilibration_reaction		S_Other
{'M_hdca_e': 1.0} <==> {'M_hdca_c': 1.0}	R_HDCAt	81.76	R_Hexadecanoate__n_C160__transport_in_via_uniport		S_Transport__Extracellular
{'M_4mhetz_c': 1.0, 'M_atp_c': 1.0} <==> {'M_4mpetz_c': 1.0, 'M_h_c': 1.0, 'M_adp_c': 1.0}	R_HETZK	0.001	R_hydroxyethylthiazole_kinase	YPL214C	S_Thiamine_Metabolism
{'M_atp_c': 1.0, 'M_glc_D_c': 1.0} <==> {'M_g6p_c': 1.0, 'M_h_c': 1.0, 'M_adp_c': 1.0}	R_HEX1	3574.55	R_hexokinase__D_glucoseATP_	( YFR053C or YGL253W or YCL040W )	S_GlycolysisGluconeogenesis
{'M_atp_c': 1.0, 'M_man_c': 1.0} <==> {'M_h_c': 1.0, 'M_adp_c': 1.0, 'M_man6p_c': 1.0}	R_HEX4	0.001	R_hexokinase__D_mannoseATP_	( YFR053C or YGL253W )	S_GlycolysisGluconeogenesis
{'M_fru_c': 1.0, 'M_atp_c': 1.0} <==> {'M_h_c': 1.0, 'M_adp_c': 1.0, 'M_f6p_c': 1.0}	R_HEX7	0.001	R_hexokinase__D_fructoseATP_	( YFR053C or YGL253W )	S_GlycolysisGluconeogenesis
{'M_hicit_m': 1.0, 'M_nad_m': 1.0} <==> {'M_nadh_m': 1.0, 'M_h_m': 1.0, 'M_oxag_m': 1.0}	R_HICITDm	0.002	R_homoisocitrate_dehydrogenase	YIL094C	S_Threonine_and_Lysine_Metabolism
{'M_his_L_e': 1.0, 'M_h_e': 1.0} <==> {'M_h_c': 1.0, 'M_his_L_c': 1.0}	R_HISt2r	132.6	R_L_histidine_reversible_transport_via_proton_symport	( YGR191W or YKR039W or YCL025C or YBR069C )	S_Transport__Extracellular
{'M_h2o_c': 1.0, 'M_hLkynr_c': 1.0} <==> {'M_ala_L_c': 1.0, 'M_3hanthrn_c': 1.0}	R_HKYNH	0.001	R_3_Hydroxy_L_kynurenine_hydrolase	YLR231C	S_Tyrosine__Tryptophan__and_Phenylalanine_Metabolism
{'M_h2o_c': 1.0, 'M_ppbng_c': 4.0} <==> {'M_hmbil_c': 1.0, 'M_nh4_c': 4.0}	R_HMBS	0.002	R_hydroxymethylbilane_synthase	YDL205C	S_Porphyrin_and_Chlorophyll_Metabolism
{'M_mev_R_c': 1.0, 'M_nadp_c': 2.0, 'M_coa_c': 1.0} <==> {'M_nadph_c': 2.0, 'M_h_c': 2.0, 'M_hmgcoa_c': 1.0}	R_HMGCOAR	-0.012	R_Hydroxymethylglutaryl_CoA_reductase	( YLR450W or YML075C )	S_Sterol_Metabolism
{'M_coa_m': 1.0, 'M_h_m': 1.0, 'M_hmgcoa_m': 1.0} <==> {'M_aacoa_m': 1.0, 'M_h2o_m': 1.0, 'M_accoa_m': 1.0}	R_HMGCOASm	-0.012	R_Hydroxymethylglutaryl_CoA_synthase__mitochondrial	YML126C	S_Sterol_Metabolism
{'M_hmgcoa_c': 1.0} <==> {'M_hmgcoa_m': 1.0}	R_HMGCOAtm	-0.012	R_Hydroxymethylglutaryl_CoA_reversible_mitochondrial_transport		S_Transport__Mitochondrial
{'M_atp_c': 1.0, 'M_4ahmmp_c': 1.0} <==> {'M_adp_c': 1.0, 'M_h_c': 1.0, 'M_4ampm_c': 1.0}	R_HMPK1	0.001	R_hydroxymethylpyrimidine_kinase__ATP_	( YOL055C or YPL258C or YPR121W )	S_Thiamine_Metabolism
{'M_iamac_c': 1.0} ---> {'M_iamac_e': 1.0}	R_IAMACt	0.001	R_Isoamyl_acetate_transport__extracellular_		S_Transport__Extracellular
{'M_ibutac_c': 1.0} ---> {'M_ibutac_e': 1.0}	R_IBUTACt	0.001	R_Isobutyl_acetate_transport__extracellular_		S_Transport__Extracellular
{'M_nad_m': 1.0, 'M_icit_m': 1.0} <==> {'M_nadh_m': 1.0, 'M_akg_m': 1.0, 'M_co2_m': 1.0}	R_ICDHxm	7385.69	R_Isocitrate_dehydrogenase__NAD_	( YNL037C and YOR136W )	S_Citric_Acid_Cycle
{'M_icit_c': 1.0, 'M_nadp_c': 1.0} <==> {'M_co2_c': 1.0, 'M_akg_c': 1.0, 'M_nadph_c': 1.0}	R_ICDHy	0.001	R_isocitrate_dehydrogenase__NADP_	YLR174W	S_Citric_Acid_Cycle
{'M_icit_c': 1.0} <==> {'M_succ_c': 1.0, 'M_glx_c': 1.0}	R_ICL	80272.9	R_Isocitrate_lyase	YER065C	S_Anaplerotic_reactions
{'M_ile_L_e': 1.0, 'M_h_e': 1.0} <==> {'M_h_c': 1.0, 'M_ile_L_c': 1.0}	R_ILEt2r	385.4	R_L_isoleucine_reversible_transport_via_proton_symport	( YBR069C or YKR039W or YCL025C or YBR068C or YDR046C )	S_Transport__Extracellular
{'M_ipdp_c': 1.0} <==> {'M_dmpp_c': 1.0}	R_IPDDI	0.002	R_isopentenyl_diphosphate_D_isomerase	YPL117C	S_Sterol_Metabolism
{'M_ipdp_c': 1.0} <==> {'M_ipdp_m': 1.0}	R_IPDPtm	0.002	R_Isopentenyl_diphosphate_transport__mitochondrial		S_Transport__Mitochondrial
{'M_nadph_m': 1.0, 'M_2ahbut_m': 1.0, 'M_h_m': 1.0} ---> {'M_nadp_m': 1.0, 'M_23dhmp_m': 1.0}	R_KARA2im	29.232	R_ketol_acid_reductoisomerase__2_Aceto_2_hydroxybutanoate___mitochondrial	YLR355C	S_Valine__Leucine__and_Isoleucine_Metabolism
{'M_o2_c': 1.0, 'M_nadph_c': 1.0, 'M_h_c': 1.0, 'M_Lkynr_c': 1.0} <==> {'M_h2o_c': 1.0, 'M_hLkynr_c': 1.0, 'M_nadp_c': 1.0}	R_KYN3OX	0.001	R_kynurenine_3_monooxygenase	YBL098W	S_Tyrosine__Tryptophan__and_Phenylalanine_Metabolism
{'M_leu_L_c': 1.0, 'M_akg_c': 1.0} <==> {'M_glu_L_c': 1.0, 'M_4mop_c': 1.0}	R_LEUTA	0.001	R_leucine_transaminase	YJR148W	S_Valine__Leucine__and_Isoleucine_Metabolism
{'M_h_e': 1.0, 'M_leu_L_e': 1.0} <==> {'M_leu_L_c': 1.0, 'M_h_c': 1.0}	R_LEUt2r	592.801	R_L_leucine_reversible_transport_via_proton_symport	( YBR069C or YKR039W or YCL025C or YBR068C or YDR046C or YDR508C )	S_Transport__Extracellular
{'M_gthrd_c': 1.0, 'M_mthgxl_c': 1.0} <==> {'M_lgt_S_c': 1.0}	R_LGTHL	0.001	R_lactoylglutathione_lyase	YML004C	S_Alternate_Carbon_Metabolism
{'M_ddcacoa_c': 0.059999999999999998, 'M_1agpc_SC_c': 0.01, 'M_dcacoa_c': 0.02, 'M_tdcoa_c': 0.10000000000000001, 'M_ocdycacoa_c': 0.089999999999999997, 'M_pmtcoa_c': 0.27000000000000002, 'M_hdcoa_c': 0.17000000000000001, 'M_stcoa_c': 0.050000000000000003, 'M_odecoa_c': 0.23999999999999999} ---> {'M_coa_c': 1.0, 'M_pc_SC_c': 0.01}	R_LPCAT_SC	13.2	R_Lyso_phosphatidylcholine_acyltransferase_acyltransferase__yeast_specific	YPR140W	S_Phospholipid_Biosynthesis
{'M_lys_L_e': 1.0, 'M_h_e': 1.0} <==> {'M_lys_L_c': 1.0, 'M_h_c': 1.0}	R_LYSt2r	572.398	R_L_lysine_reversible_transport_via_proton_symport	( YNL268W or YKR039W )	S_Transport__Extracellular
{'M_lac_L_c': 1.0, 'M_ficytc_m': 2.0} <==> {'M_pyr_c': 1.0, 'M_focytc_m': 2.0}	R_L_LACD2cm	0.001	R_L_Lactate_dehydrogenase__cytosolicmitochondrial	( ( YML054C and YEL039C ) or ( YML054C and YJR048W ) )	S_Pyruvate_Metabolism
{'M_lac_L_e': 1.0, 'M_h_e': 1.0} <==> {'M_lac_L_c': 1.0, 'M_h_c': 1.0}	R_L_LACt2r	0.001	R_L_lactate_reversible_transport_via_proton_symport	YKL217W	S_Transport__Extracellular
{'M_h2o_c': 1.0, 'M_malt_c': 1.0} <==> {'M_glc_D_c': 2.0}	R_MALT	0.001	R_alpha_glucosidase	( YBR299W or YGR292W or YJL221C or YGR287C or YIL172C or YJL216C )	S_Galactose_metabolism
{'M_malt_e': 1.0, 'M_h_e': 1.0} <==> {'M_h_c': 1.0, 'M_malt_c': 1.0}	R_MALTt2	0.001	R_maltose_transport_in_via_proton_symport	( YGR289C or YBR298C or YDL247W or YJR160C )	S_Transport__Extracellular
{'M_h_c': 1.0, 'M_man1p_c': 1.0, 'M_gtp_c': 1.0} <==> {'M_gdpmann_c': 1.0, 'M_ppi_c': 1.0}	R_MAN1PT	1615.8	R_mannose_1_phosphate_guanylyltransferase	YDL055C	S_Fructose_and_Mannose_Metabolism
{'M_man6p_c': 1.0} <==> {'M_f6p_c': 1.0}	R_MAN6PI	-1615.8	R_mannose_6_phosphate_isomerase	YER003C	S_Fructose_and_Mannose_Metabolism
{'M_mannan_c': 1.0} <==> {'M_mannan_r': 1.0}	R_MANNANter	-1615.8	R_mannan_endoplasmic_reticulum_transport_via_diffusion		S_Transport__Endoplasmic_Reticular
{'M_man_e': 1.0, 'M_h_e': 1.0} <==> {'M_h_c': 1.0, 'M_man_c': 1.0}	R_MANt2	0.001	R_D_mannose_transport_in_via_proton_symport	( YHR094C or YFL011W or YOL156W or YEL069C or YDL245C or YJR158W or YNR072W or YMR011W or YDR345C or YHR092C or YHR096C or YDR343C or YDR342C or YJL214W or YJL219W )	S_Transport__Extracellular
{'M_hcit_m': 1.0} <==> {'M_b124tc_m': 1.0, 'M_h2o_m': 1.0}	R_MCITDm	0.002	R_2_methylcitrate_dehydratase__mitochondrial		S_Threonine_and_Lysine_Metabolism
{'M_micit_m': 1.0} <==> {'M_succ_m': 1.0, 'M_pyr_m': 1.0}	R_MCITL2m	29.234	R_methylisocitrate_lyase	YPR006C	S_Anaplerotic_reactions
{'M_oaa_m': 1.0, 'M_ppcoa_m': 1.0, 'M_h2o_m': 1.0} <==> {'M_2mcit_m': 1.0, 'M_coa_m': 1.0, 'M_h_m': 1.0}	R_MCITSm	29.234	R_2_methylcitrate_synthase	YPR001W	S_Anaplerotic_reactions
{'M_mal_L_c': 1.0, 'M_nad_c': 1.0} <==> {'M_h_c': 1.0, 'M_oaa_c': 1.0, 'M_nadh_c': 1.0}	R_MDH	65135.4	R_malate_dehydrogenase	YOL126C	S_Oxidative_Phosphorylation
{'M_nad_m': 1.0, 'M_mal_L_m': 1.0} <==> {'M_oaa_m': 1.0, 'M_nadh_m': 1.0, 'M_h_m': 1.0}	R_MDHm	87687.8	R_malate_dehydrogenase__mitochondrial	YKL085W	S_Oxidative_Phosphorylation
{'M_met_L_e': 1.0, 'M_h_e': 1.0} <==> {'M_h_c': 1.0, 'M_met_L_c': 1.0}	R_METt2r	101.4	R_L_methionine_reversible_transport_via_proton_symport	( YKR039W or YCL025C or YDR508C or YBR068C or YDR046C or YGR055W or YHL036W )	S_Transport__Extracellular
{'M_utp_c': 1.0, 'M_mev_R_c': 1.0} ---> {'M_udp_c': 1.0, 'M_h_c': 1.0, 'M_5pmev_c': 1.0}	R_MEVK4	0.012	R_mevalonate_kinase__utp_	YMR208W	S_Sterol_Metabolism
{'M_ptdmeeta_SC_c': 0.01, 'M_amet_c': 1.0} <==> {'M_h_c': 1.0, 'M_ptd2meeta_SC_c': 0.01, 'M_ahcys_c': 1.0}	R_MFAPS_SC	11.9	R_methylene_fatty_acyl_phospholipid_synthase__yeast_specific	YJR073C	S_Phospholipid_Biosynthesis
{'M_dhap_c': 1.0} <==> {'M_pi_c': 1.0, 'M_mthgxl_c': 1.0}	R_MGSA	0.001	R_methylglyoxal_synthase		S_Alternate_Carbon_Metabolism
{'M_h2o_c': 1.0, 'M_mi1p_D_c': 1.0} <==> {'M_pi_c': 1.0, 'M_inost_c': 1.0}	R_MI1PP	10.6	R_myo_inositol_1_phosphatase	YHR046C	S_Phospholipid_Biosynthesis
{'M_g6p_c': 1.0} <==> {'M_mi1p_D_c': 1.0}	R_MI1PS	10.6	R_myo_Inositol_1_phosphate_synthase	YJL153C	S_Phospholipid_Biosynthesis
{'M_nadh_m': 1.0, 'M_q6_m': 1.0, 'M_h_m': 1.0} <==> {'M_nad_m': 1.0, 'M_q6h2_m': 1.0}	R_NADH2_u6m	190118	R_NADH_dehydrogenase__mitochondrial	( YML120C or YKL192C )	S_Oxidative_Phosphorylation
{'M_nad_c': 1.0, 'M_atp_c': 1.0} <==> {'M_h_c': 1.0, 'M_adp_c': 1.0, 'M_nadp_c': 1.0}	R_NADK	0.001	R_NAD_kinase	( YJR049C or YEL041W or YPL188W )	S_NAD_Biosynthesis
{'M_nadp_c': 1.0} <==> {'M_nadp_e': 1.0}	R_NADPt	0.001	R_NADP_transporter		S_Transport__Extracellular
{'M_nh4_c': 1.0, 'M_atp_c': 1.0, 'M_dnad_c': 1.0} <==> {'M_ppi_c': 1.0, 'M_h_c': 1.0, 'M_nad_c': 1.0, 'M_amp_c': 1.0}	R_NADS1	0.001	R_NAD_synthase__nh3_	YHR074W	S_NAD_Biosynthesis
{'M_h2o_c': 1.0, 'M_dgdp_c': 1.0} ---> {'M_pi_c': 1.0, 'M_dgmp_c': 1.0, 'M_h_c': 1.0}	R_NDP4	4.8	R_nucleoside_diphosphatase__dGDP_		S_Nucleotide_Salvage_Pathway
{'M_atp_c': 1.0, 'M_gdp_c': 1.0} <==> {'M_adp_c': 1.0, 'M_gtp_c': 1.0}	R_NDPK1	1710	R_nucleoside_diphosphate_kinase__ATPGDP_	YKL067W	S_Nucleotide_Salvage_Pathway
{'M_udp_c': 1.0, 'M_atp_c': 1.0} <==> {'M_utp_c': 1.0, 'M_adp_c': 1.0}	R_NDPK2	3306.62	R_nucleoside_diphosphate_kinase__ATPUDP_	YKL067W	S_Nucleotide_Salvage_Pathway
{'M_cdp_c': 1.0, 'M_atp_c': 1.0} <==> {'M_ctp_c': 1.0, 'M_adp_c': 1.0}	R_NDPK3	35.004	R_nucleoside_diphosphate_kinase__ATPCDP_	YKL067W	S_Nucleotide_Salvage_Pathway
{'M_dtdp_c': 1.0, 'M_atp_c': 1.0} <==> {'M_dttp_c': 1.0, 'M_adp_c': 1.0}	R_NDPK4	-7.2	R_nucleoside_diphosphate_kinase__ATPdTDP_	YKL067W	S_Nucleotide_Salvage_Pathway
{'M_atp_c': 1.0, 'M_dgdp_c': 1.0} <==> {'M_adp_c': 1.0, 'M_dgtp_c': 1.0}	R_NDPK5	-4.8	R_nucleoside_diphosphate_kinase__ATPdGDP_	YKL067W	S_Nucleotide_Salvage_Pathway
{'M_dcdp_c': 1.0, 'M_atp_c': 1.0} <==> {'M_dctp_c': 1.0, 'M_adp_c': 1.0}	R_NDPK7	-0.001	R_nucleoside_diphosphate_kinase__ATPdCDP_	YKL067W	S_Nucleotide_Salvage_Pathway
{'M_atp_c': 1.0, 'M_dadp_c': 1.0} <==> {'M_adp_c': 1.0, 'M_datp_c': 1.0}	R_NDPK8	-7.2	R_nucleoside_diphosphate_kinase__ATPdADP_	YKL067W	S_Nucleotide_Salvage_Pathway
{'M_idp_c': 1.0, 'M_atp_c': 1.0} <==> {'M_itp_c': 1.0, 'M_adp_c': 1.0}	R_NDPK9	0.001	R_nucleoside_diphosphate_kinase__ATPIDP_	YKL067W	S_Nucleotide_Salvage_Pathway
{'M_Nbfortyr_c': 1.0} <==> {'M_Nbfortyr_e': 1.0}	R_NFORTYRt	0.000999998	R_N_N_bisformyl_dityrosine_transport__extracellular_	YBR180W	S_Transport__Extracellular
{'M_nadph_c': 1.0, 'M_h_c': 1.0, 'M_Nfortyr_c': 2.0} <==> {'M_Nbfortyr_c': 1.0, 'M_nadp_c': 1.0}	R_NFTYROX	0.000999995	R_N_formyltyrosine_oxidase	( YDR402C and YHR042W )	S_Tyrosine__Tryptophan__and_Phenylalanine_Metabolism
{'M_nh4_e': 1.0} <==> {'M_nh4_c': 1.0}	R_NH4t	0.001	R_ammonia_reversible_transport	( YGR121C or YNL142W or YPR138C )	S_Transport__Extracellular
{'M_nh4_c': 1.0} <==> {'M_nh4_m': 1.0}	R_NH4tm	-0.1	R_NH3_mitochondrial_transport		S_Transport__Mitochondrial
{'M_h_c': 1.0, 'M_atp_c': 1.0, 'M_nmn_c': 1.0} <==> {'M_ppi_c': 1.0, 'M_nad_c': 1.0}	R_NMNAT	0.002	R_nicotinamide_nucleotide_adenylyltransferase	(YLR328W or YGR010W)	S_NAD_Biosynthesis
{'M_nmn_e': 1.0, 'M_h_e': 1.0} <==> {'M_h_c': 1.0, 'M_nmn_c': 1.0}	R_NMNTP	0.002	R_nmntp		S_Transport__Extracellular
{'M_nicrnt_c': 1.0, 'M_h_c': 1.0, 'M_atp_c': 1.0} <==> {'M_ppi_c': 1.0, 'M_dnad_c': 1.0}	R_NNAT	0.001	R_nicotinate_nucleotide_adenylyltransferase	(YLR328W or YGR010W)	S_NAD_Biosynthesis
{'M_prpp_c': 1.0, 'M_quln_c': 1.0, 'M_h_c': 2.0} <==> {'M_ppi_c': 1.0, 'M_co2_c': 1.0, 'M_nicrnt_c': 1.0}	R_NNDPR	0.001	R_nicotinate_nucleotide_diphosphorylase__carboxylating_	YFR047C	S_NAD_Biosynthesis
{'M_o2_e': 1.0} <==> {'M_o2_c': 1.0}	R_O2t	172093	R_o2_transport__diffusion_		S_Transport__Extracellular
{'M_o2_c': 1.0} <==> {'M_o2_m': 1.0}	R_O2tm	171495	R_O2_transport__diffusion_		S_Transport__Mitochondrial
{'M_coa_m': 1.0, 'M_nad_m': 1.0, 'M_2obut_m': 1.0} <==> {'M_nadh_m': 1.0, 'M_ppcoa_m': 1.0, 'M_co2_m': 1.0}	R_OBDHm	29.234	R_2_Oxobutanoate_dehydrogenase		S_Threonine_and_Lysine_Metabolism
{'M_cbp_c': 1.0, 'M_orn_c': 1.0} <==> {'M_h_c': 1.0, 'M_citr_L_c': 1.0, 'M_pi_c': 1.0}	R_OCBTi	0.001	R_ornithine_carbamoyltransferase__irreversible	YJL088W	S_Arginine_and_Proline_Metabolism
{'M_ocdcya_e': 1.0} ---> {'M_ocdcya_c': 1.0}	R_OCDCYAt	10.08	R_Octadecynoate__n_C182__transport_in_via_uniport		S_Transport__Extracellular
{'M_accoa_c': 1.0, 'M_iamoh_c': 1.0} <==> {'M_iamac_c': 1.0, 'M_coa_c': 1.0}	R_OHACT2	0.002	R_Alcohol_Acetyltransferase__isoamyl_alcohol_	( YOR377W or YGR177C )	S_Complex_Alcohol_Metabolism
{'M_accoa_c': 1.0, 'M_ibutoh_c': 1.0} ---> {'M_ibutac_c': 1.0, 'M_coa_c': 1.0}	R_OHACT4	0.001	R_Alcohol_Acetyltransferase__isobutyl_alcohol_	( YOR377W or YGR177C )	S_Complex_Alcohol_Metabolism
{'M_h_c': 1.0, 'M_orot5p_c': 1.0} <==> {'M_co2_c': 1.0, 'M_ump_c': 1.0}	R_OMPDC	119.801	R_orotidine_5__phosphate_decarboxylase	YEL021W	S_Purine_and_Pyrimidine_Biosynthesis
{'M_ppi_c': 1.0, 'M_orot5p_c': 1.0} <==> {'M_orot_c': 1.0, 'M_prpp_c': 1.0}	R_ORPT	-119.801	R_orotate_phosphoribosyltransferase	( YML106W or YMR271C )	S_Purine_and_Pyrimidine_Biosynthesis
{'M_h_m': 1.0, 'M_oxag_m': 1.0} <==> {'M_2oxoadp_m': 1.0, 'M_co2_m': 1.0}	R_OXAGm	0.002	R_non_enzymatic_reaction		S_Threonine_and_Lysine_Metabolism
{'M_pan4p_c': 1.0} <==> {'M_pan4p_m': 1.0}	R_PAN4Ptm	-0.001	R_panthetheine_4__phosphate_reversible_mitochondrial_transport		S_Transport__Mitochondrial
{'M_paps_c': 1.0, 'M_trdrd_c': 1.0} <==> {'M_so3_c': 1.0, 'M_h_c': 2.0, 'M_trdox_c': 1.0, 'M_pap_c': 1.0}	R_PAPSR	0.001	R_phosphoadenylyl_sulfate_reductase__thioredoxin_	( ( YPR167C and YLR043C ) or ( YPR167C and YGR209C ) )	S_Cysteine_Metabolism
{'M_pap_e': 1.0} <==> {'M_pap_c': 1.0}	R_PAPt	-0.002	R_PAP_reversible_uniport		S_Transport__Extracellular
{'M_pap_c': 1.0} <==> {'M_pap_m': 1.0}	R_PAPtm	-0.001	R_Adenosine_3__5__bisphosphate_mitochondrial_transport		S_Transport__Mitochondrial
{'M_pa_SC_c': 1.0} <==> {'M_pa_SC_m': 1.0}	R_PAtm_SC	0.001	R_phosphatidate_reversible_transport__mitochondrial__yeast_specific		S_Transport__Mitochondrial
{'M_pyr_c': 1.0, 'M_atp_c': 1.0, 'M_hco3_c': 1.0} <==> {'M_oaa_c': 1.0, 'M_h_c': 1.0, 'M_adp_c': 1.0, 'M_pi_c': 1.0}	R_PC	109361	R_pyruvate_carboxylase	( YGL062W or YBR218C )	S_Anaplerotic_reactions
{'M_pc_SC_c': 1.0, 'M_12dgr_SC_c': 1.0} ---> {'M_1agpc_SC_c': 1.0, 'M_triglyc_SC_c': 1.0}	R_PCDAGAT	0.132	R_phosphatidylcholine_diacylglycerol_acyltransferase	YNR008W	S_Glycerolipid_Metabolism
{'M_h2o_c': 1.0, 'M_camp_c': 1.0} <==> {'M_h_c': 1.0, 'M_amp_c': 1.0}	R_PDE1	0.00099999	R_3__5__cyclic_nucleotide_phosphodiesterase	( YOR360C or YGL248W )	S_Purine_and_Pyrimidine_Biosynthesis
{'M_nad_m': 1.0, 'M_dhlam_m': 1.0} <==> {'M_nadh_m': 1.0, 'M_h_m': 1.0, 'M_lpam_m': 1.0}	R_PDHcm	7385.69	R_pyruvate_dehydrogenase__dihydrolipoamide_dehydrogenase_	( YIL125W and YDR148C and YFL018C )	S_GlycolysisGluconeogenesis
{'M_pendp_c': 1.0} <==> {'M_pendp_m': 1.0}	R_PENDPtm	0.002	R_all_trans_Pentaprenyl_diphosphate_transport__mitochondrial		S_Transport__Mitochondrial
{'M_pe_SC_c': 0.01, 'M_amet_c': 1.0} <==> {'M_ptdmeeta_SC_c': 0.01, 'M_h_c': 1.0, 'M_ahcys_c': 1.0}	R_PETOHM_SC	11.9	R_phosphatidylethanolamine_N_methyltransferase__yeast_specific	YGR157W	S_Phospholipid_Biosynthesis
{'M_pe_SC_c': 1.0} <==> {'M_pe_SC_m': 1.0}	R_PEtm_SC	-0.209	R_phosphatidylethanolamine_mitochondrial_transport__yeast_specific		S_Transport__Mitochondrial
{'M_h2o_c': 1.0, 'M_6pgl_c': 1.0} <==> {'M_h_c': 1.0, 'M_6pgc_c': 1.0}	R_PGL	257.351	R_6_phosphogluconolactonase	( YNR034W or YHR163W or YGR248W or YCR073W-A )	S_Pentose_Phosphate_Pathway
{'M_g1p_c': 1.0} <==> {'M_g6p_c': 1.0}	R_PGMT	-3306.6	R_phosphoglucomutase	( YKL127W or YMR105C )	S_Pentose_Phosphate_Pathway
{'M_akg_c': 1.0, 'M_phe_L_c': 1.0} <==> {'M_glu_L_c': 1.0, 'M_phpyr_c': 1.0}	R_PHETA1	0.001	R_phenylalanine_transaminase	( YHR137W or YGL202W )	S_Tyrosine__Tryptophan__and_Phenylalanine_Metabolism
{'M_h_e': 1.0, 'M_phe_L_e': 1.0} <==> {'M_h_c': 1.0, 'M_phe_L_c': 1.0}	R_PHEt2r	267.801	R_L_phenylalanine_reversible_transport_via_proton_symport	( YKR039W or YCL025C or YOL020W or YBR068C or YDR046C )	S_Transport__Extracellular
{'M_cdpdag_SC_c': 0.01, 'M_inost_c': 1.0} <==> {'M_h_c': 1.0, 'M_ptd1ino_SC_c': 0.01, 'M_cmp_c': 1.0}	R_PINOS_SC	10.6	R_phosphatidylinositol_synthase__yeast_specific	YPR113W	S_Phospholipid_Biosynthesis
{'M_pi_c': 1.0, 'M_h_c': 1.0} <==> {'M_h_m': 1.0, 'M_pi_m': 1.0}	R_PIt2m	239860	R_phosphate_transporter__mitochondrial	YJR077C	S_Transport__Mitochondrial
{'M_h_e': 1.0, 'M_pi_e': 1.0} <==> {'M_pi_c': 1.0, 'M_h_c': 1.0}	R_PIt2r	373.727	R_phosphate_reversible_transport_via_symport	( YML123C or YCR037C or YBR296C or YJL198W or YNR013C )	S_Transport__Extracellular
{'M_pi_c': 1.0, 'M_oh1_m': 1.0} <==> {'M_oh1_c': 1.0, 'M_pi_m': 1.0}	R_PIt5m	-0.001	R_phosphate_transport_via_hydroxide_ion_symport__mitochondrial	YER053C	S_Transport__Mitochondrial
{'M_ptd1ino_SC_e': 0.0050000000000000001, 'M_h2o_e': 1.0} <==> {'M_g3pi_e': 0.5, 'M_ocdcya_e': 0.089999999999999997, 'M_dca_e': 0.02, 'M_ocdcea_e': 0.23999999999999999, 'M_ttdca_e': 0.10000000000000001, 'M_hdcea_e': 0.17000000000000001, 'M_ocdca_e': 0.050000000000000003, 'M_ddca_e': 0.059999999999999998, 'M_hdca_e': 0.27000000000000002, 'M_h_e': 1.0}	R_PLBP1I_SCe	111.8	R_phospholipase_B__phosphatidylinositol___yeast_specific__extracellular_	( YMR008C or YMR006C or YOL011W )	S_Phospholipid_Metabolism
{'M_pc_SC_e': 0.0050000000000000001, 'M_h2o_e': 1.0} <==> {'M_ocdcya_e': 0.089999999999999997, 'M_dca_e': 0.02, 'M_ocdcea_e': 0.23999999999999999, 'M_ttdca_e': 0.10000000000000001, 'M_hdcea_e': 0.17000000000000001, 'M_g3pc_e': 0.5, 'M_ocdca_e': 0.050000000000000003, 'M_ddca_e': 0.059999999999999998, 'M_hdca_e': 0.27000000000000002, 'M_h_e': 1.0}	R_PLBPC_SCe	0.2	R_phospholipase_B__phosphatidylcholine___yeast_specific__extracellular_	( YMR006C or YMR008C )	S_Phospholipid_Metabolism
{'M_h2o_c': 1.0, 'M_pc_SC_c': 0.01} <==> {'M_h_c': 1.0, 'M_pa_SC_c': 0.01, 'M_chol_c': 1.0}	R_PLD_SC	0.001	R_phospholipase_D__yeast_specific	YKR031C	S_Phospholipid_Metabolism
{'M_man1p_c': 1.0} <==> {'M_man6p_c': 1.0}	R_PMANM	-1615.8	R_phosphomannomutase	YFL045C	S_Fructose_and_Mannose_Metabolism
{'M_ptd2meeta_SC_c': 0.01, 'M_amet_c': 1.0} <==> {'M_h_c': 1.0, 'M_ahcys_c': 1.0, 'M_pc_SC_c': 0.01}	R_PMETM_SC	11.9	R_Phosphatidyl_N_methylethanolamine_N_methyltransferase__yeast_specific	YJR073C	S_Phospholipid_Biosynthesis
{'M_atp_c': 1.0, 'M_5pmev_c': 1.0} <==> {'M_5dpmev_c': 1.0, 'M_adp_c': 1.0}	R_PMEVK	0.012	R_phosphomevalonate_kinase	YMR220W	S_Sterol_Metabolism
{'M_atp_c': 1.0, 'M_4ampm_c': 1.0} <==> {'M_adp_c': 1.0, 'M_2mahmp_c': 1.0}	R_PMPK	0.001	R_phosphomethylpyrimidine_kinase	( YOL055C or YPL258C )	S_Thiamine_Metabolism
{'M_pnto_R_c': 1.0, 'M_atp_c': 1.0} <==> {'M_h_c': 1.0, 'M_adp_c': 1.0, 'M_4ppan_c': 1.0}	R_PNTK	0.002	R_pantothenate_kinase	YDR531W	S_Pantothenate_and_CoA_Biosynthesis
{'M_pnto_R_e': 1.0, 'M_h_e': 1.0} <==> {'M_pnto_R_c': 1.0, 'M_h_c': 1.0}	R_PNTOt2	0.002	R_Pantothenate_reversible_transport_via_proton_symport	YCR028C	S_Transport__Extracellular
{'M_h2o_c': 1.0, 'M_ppi_c': 1.0} ---> {'M_pi_c': 2.0, 'M_h_c': 1.0}	R_PPA	5566.79	R_inorganic_diphosphatase	YBR011C	S_Oxidative_Phosphorylation
{'M_ppi_m': 1.0, 'M_h2o_m': 1.0} <==> {'M_h_m': 1.0, 'M_pi_m': 2.0}	R_PPAm	87658.7	R_inorganic_diphosphatase	YMR267W	S_Oxidative_Phosphorylation
{'M_5aop_c': 2.0} <==> {'M_h2o_c': 2.0, 'M_h_c': 1.0, 'M_ppbng_c': 1.0}	R_PPBNGS	0.008	R_porphobilinogen_synthase	YGL040C	S_Porphyrin_and_Chlorophyll_Metabolism
{'M_h_c': 1.0, 'M_4ppcys_c': 1.0} <==> {'M_co2_c': 1.0, 'M_pan4p_c': 1.0}	R_PPCDC	0.002	R_phosphopantothenoylcysteine_decarboxylase		S_Pantothenate_and_CoA_Biosynthesis
{'M_oaa_c': 1.0, 'M_atp_c': 1.0} <==> {'M_co2_c': 1.0, 'M_pep_c': 1.0, 'M_adp_c': 1.0}	R_PPCK	0.006	R_phosphoenolpyruvate_carboxykinase	YKR097W	S_Anaplerotic_reactions
{'M_r1p_c': 1.0} <==> {'M_r5p_c': 1.0}	R_PPM	-38.336	R_phosphopentomutase	( YKL127W or YMR105C )	S_Pentose_Phosphate_Pathway
{'M_ctp_c': 1.0, 'M_cys_L_c': 1.0, 'M_4ppan_c': 1.0} <==> {'M_ppi_c': 1.0, 'M_h_c': 1.0, 'M_cmp_c': 1.0, 'M_4ppcys_c': 1.0}	R_PPNCL2	0.002	R_phosphopantothenate_cysteine_ligase		S_Pantothenate_and_CoA_Biosynthesis
{'M_pphn_c': 1.0, 'M_nad_c': 1.0} ---> {'M_co2_c': 1.0, 'M_34hpp_c': 1.0, 'M_nadh_c': 1.0}	R_PPND	0.001	R_prephenate_dehydrogenase		S_Tyrosine__Tryptophan__and_Phenylalanine_Metabolism
{'M_pppg9_c': 1.0} <==> {'M_pppg9_m': 1.0}	R_PPPG9tm	0.002	R_protoporphyrinogen_IX_mitochondrial_transport		S_Transport__Mitochondrial
{'M_o2_m': 3.0, 'M_pppg9_m': 2.0} <==> {'M_ppp9_m': 2.0, 'M_h2o_m': 6.0}	R_PPPGOm	0.001	R_protoporphyrinogen_oxidase__mitochondrial	YER014W	S_Porphyrin_and_Chlorophyll_Metabolism
{'M_ipdp_m': 1.0, 'M_pendp_m': 1.0} <==> {'M_ppi_m': 1.0, 'M_hexdp_m': 1.0}	R_PPTTm	0.002	R_trans_pentaprenyltranstransferase__mitochondrial	YBR003W	S_Quinone_Biosynthesis
{'M_h_c': 1.0, 'M_phpyr_c': 1.0} <==> {'M_co2_c': 1.0, 'M_pacald_c': 1.0}	R_PPYRDC	0.001	R_Phenylpyruvate_decarboxylase	( YLR044C or YLR134W or YGR087C or YDR380W )	S_Complex_Alcohol_Metabolism
{'M_pro_L_m': 1.0, 'M_nad_m': 1.0} <==> {'M_nadh_m': 1.0, 'M_1pyr5c_m': 1.0, 'M_h_m': 2.0}	R_PRO1xm	0.001	R_proline_oxidase__NAD___mitochondrial	YLR142W	S_Arginine_and_Proline_Metabolism
{'M_pro_L_e': 1.0, 'M_h_e': 1.0} <==> {'M_h_c': 1.0, 'M_pro_L_c': 1.0}	R_PROt2r	329.401	R_L_proline_reversible_transport_via_proton_symport	( YKR039W or YOR348C )	S_Transport__Extracellular
{'M_pro_L_c': 1.0} <==> {'M_pro_L_m': 1.0}	R_PROtm	0.001	R_L_proline_transport__mitochondrial		S_Transport__Mitochondrial
{'M_r5p_c': 1.0, 'M_atp_c': 1.0} <==> {'M_prpp_c': 1.0, 'M_h_c': 1.0, 'M_amp_c': 1.0}	R_PRPPS	219.013	R_phosphoribosylpyrophosphate_synthetase	( YER099C or YOL061W or YBL068W or YHL011C or YKL181W )	S_Histidine_Metabolism
{'M_pep_c': 1.0, 'M_skm5p_c': 1.0} <==> {'M_3psme_c': 1.0, 'M_pi_c': 1.0}	R_PSCVTi	0.003	R_3_phosphoshikimate_1_carboxyvinyltransferase__irreversible	YDR127W	S_Tyrosine__Tryptophan__and_Phenylalanine_Metabolism
{'M_ps_SC_m': 0.01, 'M_h_m': 1.0} ---> {'M_pe_SC_m': 0.01, 'M_co2_m': 1.0}	R_PSERDm_SC	20.9	R_phosphatidylserine_decarboxylase__yeast_specific__mitochondrial	YNL169C	S_Phospholipid_Biosynthesis
{'M_ser_L_c': 1.0, 'M_cdpdag_SC_c': 0.01} <==> {'M_h_c': 1.0, 'M_cmp_c': 1.0, 'M_ps_SC_c': 0.01}	R_PSERS_SC	24.2	R_phosphatidylserine_synthase__yeast_specific	YER026C	S_Phospholipid_Biosynthesis
{'M_ser_L_m': 1.0, 'M_cdpdag_SC_m': 0.01} <==> {'M_ps_SC_m': 0.01, 'M_cmp_m': 1.0, 'M_h_m': 1.0}	R_PSERSm_SC	0.1	R_phosphatidylserine_synthase__yeast_specific__mitochondrial	YER026C	S_Phospholipid_Biosynthesis
{'M_ps_SC_c': 1.0} <==> {'M_ps_SC_m': 1.0}	R_PStm_SC	0.208	R_phosphatidylserine_mitochondrial__transport__yeast_specific		S_Transport__Mitochondrial
{'M_h_c': 1.0, 'M_atp_c': 1.0, 'M_pan4p_c': 1.0} <==> {'M_ppi_c': 1.0, 'M_dpcoa_c': 1.0}	R_PTPATi	0.003	R_pantetheine_phosphate_adenylyltransferase		S_Pantothenate_and_CoA_Biosynthesis
{'M_pi_c': 1.0, 'M_adn_c': 1.0} <==> {'M_ade_c': 1.0, 'M_r1p_c': 1.0}	R_PUNP1	58.466	R_purine_nucleoside_phosphorylase__Adenosine_	YLR209C	S_Nucleotide_Salvage_Pathway
{'M_pi_c': 1.0, 'M_gsn_c': 1.0} <==> {'M_gua_c': 1.0, 'M_r1p_c': 1.0}	R_PUNP3	-96.802	R_purine_nucleoside_phosphorylase__Guanosine_	YLR209C	S_Nucleotide_Salvage_Pathway
{'M_nadp_m': 1.0, 'M_glu5sa_m': 1.0, 'M_h2o_m': 1.0} ---> {'M_nadph_m': 1.0, 'M_h_m': 2.0, 'M_glu_L_m': 1.0}	R_PYR5CDm	0.001	R_D1_pyrroline_5_carboxylate_dehydrogenase__mitochondrial	YHR037W	S_Glutamate_metabolism
{'M_pyr_c': 1.0, 'M_h_c': 1.0} <==> {'M_co2_c': 1.0, 'M_acald_c': 1.0}	R_PYRDC	0.001	R_pyruvate_decarboxylase	( YGR087C or YLR134W or YLR044C )	S_Pyruvate_Metabolism
{'M_pyr_c': 1.0, 'M_h_c': 1.0, 'M_acald_c': 1.0} <==> {'M_co2_c': 1.0, 'M_actn_R_c': 1.0}	R_PYRDC2	0.001	R_pyruvate_decarboxylase__acetoin_forming_	( YLR044C or YGR087C or YLR134W )	S_Pyruvate_Metabolism
{'M_h_e': 1.0, 'M_pyr_e': 1.0} <==> {'M_pyr_c': 1.0, 'M_h_c': 1.0}	R_PYRt2	0.001	R_pyruvate_transport_in_via_proton_symport	YKL217W	S_Transport__Extracellular
{'M_cmusa_c': 1.0} <==> {'M_h2o_c': 1.0, 'M_quln_c': 1.0, 'M_h_c': 1.0}	R_QUILSYN	0.001	R_Quinolinate_Synthase__Eukaryotic_		S_Quinone_Biosynthesis
{'M_atp_c': 1.0, 'M_ribflv_c': 1.0} <==> {'M_h_c': 1.0, 'M_adp_c': 1.0, 'M_fmn_c': 1.0}	R_RBFK	0.002	R_riboflavin_kinase	YDR236C	S_Riboflavin_Metabolism
{'M_ribflv_e': 1.0, 'M_h_e': 1.0} <==> {'M_h_c': 1.0, 'M_ribflv_c': 1.0}	R_RIBFLVt2	1.982	R_riboflavin_transport_in_via_proton_symport		S_Transport__Extracellular
{'M_trdrd_c': 1.0, 'M_atp_c': 1.0} <==> {'M_h2o_c': 1.0, 'M_trdox_c': 1.0, 'M_datp_c': 1.0}	R_RNTR1	7.2	R_ribonucleoside_triphosphate_reductase__ATP_	( YLR043C or YGR209C )	S_Nucleotide_Salvage_Pathway
{'M_trdrd_c': 1.0, 'M_gtp_c': 1.0} <==> {'M_h2o_c': 1.0, 'M_trdox_c': 1.0, 'M_dgtp_c': 1.0}	R_RNTR2	4.8	R_ribonucleoside_triphosphate_reductase__GTP_	( YLR043C or YGR209C )	S_Nucleotide_Salvage_Pathway
{'M_ctp_c': 1.0, 'M_trdrd_c': 1.0} <==> {'M_h2o_c': 1.0, 'M_dctp_c': 1.0, 'M_trdox_c': 1.0}	R_RNTR3	0.001	R_ribonucleoside_triphosphate_reductase__CTP_	( YGR209C or YLR043C )	S_Nucleotide_Salvage_Pathway
{'M_utp_c': 1.0, 'M_trdrd_c': 1.0} <==> {'M_h2o_c': 1.0, 'M_dutp_c': 1.0, 'M_trdox_c': 1.0}	R_RNTR4	0.001	R_ribonucleoside_triphosphate_reductase__UTP_	( YLR043C or YGR209C )	S_Nucleotide_Salvage_Pathway
{'M_r5p_c': 1.0} <==> {'M_ru5p_D_c': 1.0}	R_RPI	-257.351	R_ribose_5_phosphate_isomerase	YOR095C	S_Pentose_Phosphate_Pathway
{'M_glu_L_c': 1.0, 'M_L2aadp6sa_c': 1.0, 'M_nadph_c': 1.0, 'M_h_c': 1.0} <==> {'M_h2o_c': 1.0, 'M_nadp_c': 1.0, 'M_saccrp_L_c': 1.0}	R_SACCD1	0.002	R_saccharopine_dehydrogenase__NADP__L_glutamate_forming_	YNR050C	S_Threonine_and_Lysine_Metabolism
{'M_h2o_c': 1.0, 'M_nad_c': 1.0, 'M_saccrp_L_c': 1.0} <==> {'M_akg_c': 1.0, 'M_h_c': 1.0, 'M_lys_L_c': 1.0, 'M_nadh_c': 1.0}	R_SACCD2	0.002	R_saccharopine_dehydrogenase__NAD__L_lysine_forming_	YIR034C	S_Threonine_and_Lysine_Metabolism
{'M_h_c': 1.0, 'M_atp_c': 1.0, 'M_so4_c': 1.0} <==> {'M_ppi_c': 1.0, 'M_aps_c': 1.0}	R_SADT	0.001	R_sulfate_adenylyltransferase	YJR010W	S_Cysteine_Metabolism
{'M_h_e': 1.0, 'M_ser_L_e': 1.0} <==> {'M_ser_L_c': 1.0, 'M_h_c': 1.0}	R_SERt2r	453.466	R_L_serine_reversible_transport_via_proton_symport	( YFL055W or YCL025C or YDR508C or YKR039W or YPL265W )	S_Transport__Extracellular
{'M_nadph_c': 1.0, 'M_h_c': 1.0, 'M_3dhsk_c': 1.0} <==> {'M_nadp_c': 1.0, 'M_skm_c': 1.0}	R_SHK3D	0.003	R_shikimate_dehydrogenase	YDR127W	S_Tyrosine__Tryptophan__and_Phenylalanine_Metabolism
{'M_atp_c': 1.0, 'M_skm_c': 1.0} <==> {'M_skm5p_c': 1.0, 'M_h_c': 1.0, 'M_adp_c': 1.0}	R_SHKK	0.003	R_shikimate_kinase	YDR127W	S_Tyrosine__Tryptophan__and_Phenylalanine_Metabolism
{'M_so3_c': 1.0} <==> {'M_so3_e': 1.0}	R_SO3ti	0.001	R_sulfite_transport__efflux__cytosol_to_extracellular_	YPL092W	S_Transport__Extracellular
{'M_so4_e': 1.0} <==> {'M_so4_c': 1.0}	R_SO4ti	40.001	R_sulfate_irreversible_uniport	( YBR294W or YLR092W or YGR125W )	S_Transport__Extracellular
{'M_h2o_c': 1.0, 'M_sucsal_c': 1.0, 'M_nadp_c': 1.0} <==> {'M_nadph_c': 1.0, 'M_h_c': 2.0, 'M_succ_c': 1.0}	R_SSALy	65135.4	R_succinate_semialdehyde_dehydrogenase__NADP_	YBR006W	S_Glutamate_metabolism
{'M_fad_m': 1.0, 'M_succ_m': 1.0} <==> {'M_fadh2_m': 1.0, 'M_fum_m': 1.0}	R_SUCD1m	-49.401	R_succinate_dehydrogenase	( ( YKL141W and YKL148C and YLL041C and YLR164W ) or ( YDR178W and YKL148C and YLL041C and YMR118C ) or ( YDR178W and YJL045W and YKL141W and YLL041C ) or ( YDR178W and YKL141W and YKL148C and YLL041C ) )	S_Oxidative_Phosphorylation
{'M_succ_m': 1.0, 'M_q6_m': 1.0} <==> {'M_q6h2_m': 1.0, 'M_fum_m': 1.0}	R_SUCD2_u6m	152873	R_succinate_dehydrogenase__ubiquinone_6___mitochondrial	( ( YDR178W and YKL141W and YKL148C and YLL041C ) or ( YKL141W and YKL148C and YLL041C and YLR164W ) or ( YDR178W and YKL148C and YLL041C and YMR118C ) or ( YDR178W and YJL045W and YKL141W and YLL041C ) )	S_Citric_Acid_Cycle
{'M_succ_c': 1.0, 'M_fum_m': 1.0} <==> {'M_fum_c': 1.0, 'M_succ_m': 1.0}	R_SUCFUMtm	145408	R_succinate_fumarate_transport__mitochondrial	( YJR095W or YLR348C )	S_Transport__Mitochondrial
{'M_coa_m': 1.0, 'M_atp_m': 1.0, 'M_succ_m': 1.0} <==> {'M_succoa_m': 1.0, 'M_adp_m': 1.0, 'M_pi_m': 1.0}	R_SUCOASm	-7385.69	R_Succinate__CoA_ligase__ADP_forming_	( YGR244C and YOR142W )	S_Citric_Acid_Cycle
{'M_s7p_c': 1.0, 'M_g3p_c': 1.0} <==> {'M_e4p_c': 1.0, 'M_f6p_c': 1.0}	R_TALA	0.002	R_transaldolase	( YLR354C or YGR043C )	S_Pentose_Phosphate_Pathway
{'M_trdrd_c': 1.0, 'M_h2o2_c': 1.0} <==> {'M_h2o_c': 2.0, 'M_trdox_c': 1.0}	R_THIORDXi	0.001	R_hydrogen_peroxide_reductase__thioredoxin_	( ( YLR043C and YDR453C ) or ( YGR209C and YDR453C ) )	S_Other
{'M_h_e': 1.0, 'M_thymd_e': 1.0} ---> {'M_thymd_c': 1.0, 'M_h_c': 1.0}	R_THMDt2	4.798	R_thymidine_transport_in_via_proton_symport		S_Transport__Extracellular
{'M_h2o_c': 1.0, 'M_thmmp_c': 1.0} <==> {'M_thm_c': 1.0, 'M_pi_c': 1.0}	R_THMP	0.001	R_thiamin_phosphatase		S_Thiamine_Metabolism
{'M_h_e': 1.0, 'M_thm_e': 1.0} ---> {'M_thm_c': 1.0, 'M_h_c': 1.0}	R_THMt2	0.002	R_Thiamine_transport_in_via_proton_symport	( YLR237W or YOR071C or YOR192C )	S_Transport__Extracellular
{'M_h_e': 1.0, 'M_thr_L_e': 1.0} <==> {'M_thr_L_c': 1.0, 'M_h_c': 1.0}	R_THRt2r	382.8	R_L_threonine_reversible_transport_via_proton_symport	( YKR039W or YBR069C or YCL025C or YDR508C )	S_Transport__Extracellular
{'M_thym_c': 1.0, 'M_h_e': 1.0} <==> {'M_h_c': 1.0, 'M_thym_e': 1.0}	R_THYMt3r	4.798	R_thymine_reversible_transport_via_proton_antiport		S_Transport__Extracellular
{'M_r5p_c': 1.0, 'M_xu5p_D_c': 1.0} <==> {'M_s7p_c': 1.0, 'M_g3p_c': 1.0}	R_TKT1	0.002	R_transketolase	( YBR117C or YPR074C )	S_Pentose_Phosphate_Pathway
{'M_e4p_c': 1.0, 'M_xu5p_D_c': 1.0} <==> {'M_f6p_c': 1.0, 'M_g3p_c': 1.0}	R_TKT2	-0.001	R_transketolase	( YPR074C or YBR117C )	S_Pentose_Phosphate_Pathway
{'M_thm_c': 1.0, 'M_atp_c': 1.0} ---> {'M_h_c': 1.0, 'M_thmpp_c': 1.0, 'M_amp_c': 1.0}	R_TMDPK	0.002	R_thiamine_diphosphokinase	YOR143C	S_Thiamine_Metabolism
{'M_pi_c': 1.0, 'M_thymd_c': 1.0} <==> {'M_thym_c': 1.0, 'M_2dr1p_c': 1.0}	R_TMDPP	4.798	R_thymidine_phosphorylase	YLR209C	S_Purine_and_Pyrimidine_Biosynthesis
{'M_atp_c': 1.0, 'M_thmpp_c': 1.0} <==> {'M_thmtp_c': 1.0, 'M_adp_c': 1.0}	R_TMDPPK	0.002	R_thiamine_diphosphate_kinase	YOR143C	S_Thiamine_Metabolism
{'M_h2o_c': 1.0, 'M_thm_c': 1.0} <==> {'M_4mhetz_c': 1.0, 'M_h_c': 1.0, 'M_4ahmmp_c': 1.0}	R_TMN	0.001	R_thiaminase		S_Thiamine_Metabolism
{'M_4mpetz_c': 1.0, 'M_h_c': 1.0, 'M_2mahmp_c': 1.0} <==> {'M_ppi_c': 1.0, 'M_thmmp_c': 1.0}	R_TMPPP	0.001	R_thiamine_phosphate_diphosphorylase	YPL214C	S_Thiamine_Metabolism
{'M_dhap_c': 1.0} <==> {'M_g3p_c': 1.0}	R_TPI	0.001	R_triose_phosphate_isomerase	YDR050C	S_GlycolysisGluconeogenesis
{'M_nadph_c': 1.0, 'M_h_c': 1.0, 'M_trdox_c': 1.0} <==> {'M_trdrd_c': 1.0, 'M_nadp_c': 1.0}	R_TRDR	12.004	R_thioredoxin_reductase__NADPH_	( ( YDR353W and YDR353W ) or YLR043C or ( YDR353W and YGR209C ) )	S_Purine_and_Pyrimidine_Biosynthesis
{'M_h2o_v': 1.0, 'M_tre_v': 1.0} <==> {'M_glc_D_v': 2.0}	R_TREHv	0.001	R_alpha_alpha_trehalase__vacuolar_	YPR026W	S_Alternate_Carbon_Metabolism
{'M_tre_e': 1.0, 'M_h_e': 1.0} ---> {'M_tre_c': 1.0, 'M_h_c': 1.0}	R_TREt2	46.801	R_trehalose_transport_in_via_proton_symporter		S_Transport__Extracellular
{'M_tre_c': 1.0, 'M_h_c': 1.0} <==> {'M_h_v': 1.0, 'M_tre_v': 1.0}	R_TREt2v	0.001	R_trehalose_vacuolar_transport_via_proton_symport		S_Transport__Vacuolar
{'M_o2_c': 1.0, 'M_trp_L_c': 1.0} <==> {'M_Lfmkynr_c': 1.0}	R_TRPO2	0.001	R_L_Tryptophanoxygen_2_3_oxidoreductase__decyclizing_	YJR078W	S_Tyrosine__Tryptophan__and_Phenylalanine_Metabolism
{'M_trp_L_e': 1.0, 'M_h_e': 1.0} <==> {'M_h_c': 1.0, 'M_trp_L_c': 1.0}	R_TRPt2r	56.801	R_L_tryptophan_reversible_transport_via_proton_symport	( YBR069C or YKR039W or YOL020W or YBR068C or YDR046C )	S_Transport__Extracellular
{'M_ttdca_e': 1.0} <==> {'M_ttdca_c': 1.0}	R_TTDCAtr	11.2	R_fatty_acid_transport		S_Transport__Extracellular
{'M_tyr_L_c': 1.0, 'M_10fthf_c': 1.0} <==> {'M_h_c': 1.0, 'M_Nfortyr_c': 1.0, 'M_thf_c': 1.0}	R_TYRNFT	0.00199999	R_L_tyrosine_N_formyltransferase	YDR403W	S_Tyrosine__Tryptophan__and_Phenylalanine_Metabolism
{'M_glu_L_c': 1.0, 'M_34hpp_c': 1.0} <==> {'M_akg_c': 1.0, 'M_tyr_L_c': 1.0}	R_TYRTAi	0.001	R_tyrosine_transaminase__irreversible	( YGL202W or YHR137W or YLR027C )	S_Tyrosine__Tryptophan__and_Phenylalanine_Metabolism
{'M_h_e': 1.0, 'M_tyr_L_e': 1.0} <==> {'M_tyr_L_c': 1.0, 'M_h_c': 1.0}	R_TYRt2r	204.001	R_L_tyrosine_reversible_transport_via_proton_symport	( YBR069C or YKR039W or YCL025C or YBR068C or YOL020W or YDR046C or YCL025C )	S_Transport__Extracellular
{'M_tyr_L_c': 1.0, 'M_h_v': 1.0} ---> {'M_h_c': 1.0, 'M_tyr_L_v': 1.0}	R_TYRt6	0.0005	R_L_tyrosine_transport_in_via_proton_antiport__vacuolar_	( YBR293W or YJR001W )	S_Transport__Vacuolar
{'M_tyr_L_v': 1.0, 'M_h_v': 1.0} ---> {'M_tyr_L_c': 1.0, 'M_h_c': 1.0}	R_TYRt7	0.0005	R_L_tyrosine_transport_out_via_proton_symport__vacuolar	( YKL146W or YNL101W )	S_Transport__Vacuolar
{'M_utp_c': 1.0, 'M_h_c': 1.0, 'M_acgam1p_c': 1.0} <==> {'M_ppi_c': 1.0, 'M_udpacgal_c': 1.0}	R_UDPACGLP	0.002	R_UDP_N_acetylglucosamine_diphosphorylase	YDL103C	S_Glutamate_metabolism
{'M_udpg_c': 1.0} <==> {'M_udpgal_c': 1.0}	R_UDPG4E	-0.001	R_UDPglucose_4_epimerase	YBR019C	S_Galactose_metabolism
{'M_h2o_c': 1.0, 'M_urdglyc_c': 1.0, 'M_h_c': 2.0} <==> {'M_co2_c': 1.0, 'M_glx_c': 1.0, 'M_nh4_c': 2.0}	R_UGLYCHr	29087.8	R_Ureidoglycolate_hydrolase	YIR032C	S_Histidine_Metabolism
{'M_ump_c': 1.0, 'M_atp_c': 1.0} <==> {'M_udp_c': 1.0, 'M_adp_c': 1.0}	R_UMPK	0.001	R_UMP_kinase	YKL024C	S_Nucleotide_Salvage_Pathway
{'M_hmbil_c': 1.0} <==> {'M_h2o_c': 1.0, 'M_uppg3_c': 1.0}	R_UPP3S	0.002	R_uroporphyrinogen_III_synthase	YOR278W	S_Porphyrin_and_Chlorophyll_Metabolism
{'M_uppg3_c': 1.0, 'M_h_c': 4.0} <==> {'M_co2_c': 4.0, 'M_cpppg3_c': 1.0}	R_UPPDC1	0.002	R_uroporphyrinogen_decarboxylase__uroporphyrinogen_III_	YDR047W	S_Porphyrin_and_Chlorophyll_Metabolism
{'M_urea_e': 1.0, 'M_h_e': 2.0} <==> {'M_h_c': 2.0, 'M_urea_c': 1.0}	R_UREA2t2	-29087.8	R_urea_reversible_transport_via_proton_symport__2_H_	YHL016C	S_Transport__Extracellular
{'M_akg_c': 1.0, 'M_val_L_c': 1.0} <==> {'M_glu_L_c': 1.0, 'M_3mob_c': 1.0}	R_VALTA	0.001	R_valine_transaminase	YJR148W	S_Valine__Leucine__and_Isoleucine_Metabolism
{'M_h_e': 1.0, 'M_val_L_e': 1.0} <==> {'M_h_c': 1.0, 'M_val_L_c': 1.0}	R_VALt2r	529.201	R_L_valine_reversible_transport_via_proton_symport	( YKR039W or YCL025C or YDR046C or YBR069C or YBR068C )	S_Transport__Extracellular
{'M_atp_c': 1.0, 'M_xylu_D_c': 1.0} <==> {'M_xu5p_D_c': 1.0, 'M_h_c': 1.0, 'M_adp_c': 1.0}	R_XYLK	0.001	R_xylulokinase	YGR194C	S_Xylose_Metabolism
{'M_xyl_D_c': 1.0, 'M_nadph_c': 1.0, 'M_h_c': 1.0} ---> {'M_nadp_c': 1.0, 'M_xylt_c': 1.0}	R_XYLR	0.001	R_xylose_reductase	YHR104W	S_Xylose_Metabolism
{'M_nad_c': 1.0, 'M_xylt_c': 1.0} <==> {'M_h_c': 1.0, 'M_nadh_c': 1.0, 'M_xylu_D_c': 1.0}	R_XYLTD_D	0.001	R_xylitol_dehydrogenase__D_xyulose_forming_	YLR070C	S_Xylose_Metabolism
{'M_xyl_D_e': 1.0} <==> {'M_xyl_D_c': 1.0}	R_XYLt	0.001	R_D_xylose_reversible_transport		S_Transport__Extracellular
{'M_h2o_e': 1.0, 'M_zymstest_SC_e': 0.01} ---> {'M_zymst_e': 0.01, 'M_hexc_e': 0.01, 'M_ocdcea_e': 0.27000000000000002, 'M_ttdca_e': 0.014999999999999999, 'M_hdcea_e': 0.65500000000000003, 'M_ocdca_e': 0.029999999999999999, 'M_hdca_e': 0.02, 'M_h_e': 1.0}	R_ZYMSTESTH_SCe	2576	R_zymosterol_ester_hydrolase__yeast_specific__extracellular_	YLR020C	S_Sterol_Metabolism
{'M_zymst_e': 1.0} <==> {'M_zymst_c': 1.0}	R_ZYMSTt	25.76	R_zymosterol_reversible_transport	( YIL013C or YOR011W )	S_Transport__Extracellular
{'M_ump_c': 0.059900000000000002, 'M_camp_c': 9.9999999999999995e-07, 'M_gmp_c': 0.045999999999999999, 'M_cys_L_c': 0.0066, 'M_q6_m': 9.9999999999999995e-07, 'M_fad_c': 9.9999999999999995e-07, 'M_dtmp_c': 0.0035999999999999999, 'M_13BDglcn_c': 1.1348, 'M_amp_c': 0.045999999999999999, 'M_tyr_L_c': 0.10199999999999999, 'M_atp_c': 59.276000000000003, 'M_coa_c': 9.9999999999999995e-07, 'M_glu_L_c': 0…	R_biomass_published	2000	R_biomass_published
